# Supplementary material for: Impact of Alpha-Adrenergic Receptor Antagonists on outcomes in patients with heart failure. A post-hoc analysis using National Health Fund database
Source: Research Square preprint supplement (doi:10.21203/rs.3.rs-259923/v1), 2021-02-26
Supplement: Supplementary file 1 [file abb5a9ce488f2b9a83f092b9.csv]

gender	age	duration.of.hospitalization	advanced.chf	alpha.adrenolytic	acei	arb	mra	beta.adrenolytic	diuretic	digoxine	ccb	anticoagulant	statin	antidiabetic	type.of.bb	type.of.aa	antiplatelet	nitrate	death	time.to.death	combined.event	time.to.combined.event
2	94	12	0	0	1	1	0	1	1	0	1	1	0	0	carvedilol	NA	0	0	1	1095	1	6
1	86	14	0	0	1	0	0	1	1	0	0	0	1	0	carvedilol	NA	0	1	1	1085	1	1080
2	86	6	0	0	1	0	1	1	1	0	0	0	0	0	other	NA	0	1	1	1945	1	1945
1	86	7	0	0	1	0	1	0	1	0	0	0	1	0	NA	NA	0	1	1	1790	1	1790
1	86	10	0	0	1	0	1	0	1	0	0	0	1	1	NA	NA	0	0	1	717	1	717
2	87	4	0	0	1	0	0	0	0	0	0	0	0	0	NA	NA	0	0	1	786	1	743
1	86	2	0	0	1	0	0	0	0	0	0	0	0	0	NA	NA	0	1	1	1649	1	1649
2	87	7	0	0	1	0	0	0	0	0	0	0	0	1	NA	NA	0	0	1	1533	1	83
2	87	13	0	0	1	0	0	1	0	0	0	0	0	0	nebivolol	NA	0	0	1	9	1	9
2	86	7	0	0	0	0	0	1	1	1	0	0	0	0	carvedilol	NA	0	0	1	899	1	128
2	86	7	0	0	0	0	0	1	0	0	0	0	0	0	carvedilol	NA	0	0	0	2059	0	2059
2	86	11	0	0	1	0	1	1	1	1	0	0	0	0	nebivolol	NA	0	0	1	352	1	352
1	87	8	0	0	0	0	0	1	1	1	0	0	0	0	nebivolol	NA	0	0	1	572	1	550
1	86	12	0	1	0	0	1	0	0	0	1	0	0	0	NA	doxazosin	1	1	1	30	1	30
2	86	5	0	0	1	0	0	0	0	0	0	0	1	0	NA	NA	0	0	1	586	1	586
1	87	5	0	0	1	0	0	0	1	0	0	0	0	1	NA	NA	0	0	1	854	1	832
2	86	7	0	0	1	0	0	0	0	0	0	0	0	0	NA	NA	0	0	0	2115	0	2115
2	87	9	0	0	1	0	1	0	0	0	0	0	0	0	NA	NA	0	0	1	537	1	537
2	87	3	0	0	0	1	0	1	0	0	0	0	0	1	carvedilol	NA	0	1	1	284	1	284
2	86	10	0	0	1	0	1	1	1	0	0	0	1	0	carvedilol	NA	0	1	1	50	1	49
2	86	18	0	0	0	0	1	0	1	1	0	0	0	0	NA	NA	0	0	1	606	1	606
2	93	4	0	0	1	0	1	0	1	0	0	0	1	0	NA	NA	0	0	1	557	1	557
2	87	5	0	0	1	0	0	0	0	0	0	0	1	1	NA	NA	0	0	1	816	1	643
1	87	4	0	1	1	0	0	1	1	0	0	0	1	0	bisoprolol	doxazosin	0	1	0	1936	0	1936
2	93	6	0	0	1	0	0	0	0	0	1	0	0	0	NA	NA	0	0	1	763	1	763
2	86	10	0	0	1	1	0	1	1	0	0	1	1	0	bisoprolol	NA	0	0	1	1703	1	1124
2	87	5	0	0	0	0	1	1	1	1	0	0	1	0	carvedilol	NA	0	0	1	235	1	234
2	87	11	0	0	1	0	1	0	1	0	0	0	1	0	NA	NA	0	0	1	164	1	164
1	93	5	0	0	1	0	0	1	1	0	0	0	1	0	carvedilol	NA	0	0	1	588	1	588
2	86	7	1	0	0	0	0	1	0	0	0	0	0	0	carvedilol	NA	0	0	1	1003	1	1003
2	93	3	0	0	0	0	1	0	1	1	0	0	0	0	NA	NA	0	0	1	21	1	21
2	87	16	0	0	1	0	1	0	1	0	0	0	1	1	NA	NA	0	0	1	1354	1	1354
1	86	14	0	0	0	0	1	1	1	1	0	0	0	0	carvedilol	NA	0	0	1	44	1	44
2	86	18	0	0	1	0	0	0	0	0	0	0	0	0	NA	NA	0	0	1	995	1	995
2	87	4	0	0	0	0	1	0	0	0	0	0	1	0	NA	NA	0	1	0	1814	0	1814
2	86	11	0	0	1	0	1	0	0	0	0	0	0	0	NA	NA	0	0	1	634	1	634
2	86	11	0	0	1	0	0	0	0	0	0	0	1	0	NA	NA	0	0	1	1360	1	1324
2	87	33	0	0	1	0	0	0	1	0	0	0	1	0	NA	NA	0	0	1	10	1	10
2	86	2	0	0	0	0	0	1	0	0	1	0	0	0	bisoprolol	NA	0	0	0	2078	0	2078
1	87	7	0	0	1	0	0	0	1	0	0	0	1	1	NA	NA	0	0	0	1848	1	28
1	87	3	0	0	1	0	0	1	1	1	0	0	0	0	carvedilol	NA	0	0	1	1632	1	1631
1	93	8	0	0	1	0	0	0	0	0	0	0	1	0	NA	NA	0	1	1	5	1	5
2	86	4	0	0	0	1	1	1	1	0	0	0	0	0	carvedilol	NA	0	0	1	69	1	19
2	86	7	0	0	1	0	0	0	1	0	0	1	0	1	NA	NA	0	0	1	184	1	184
1	86	9	0	0	1	0	0	0	0	0	0	0	0	0	NA	NA	0	0	1	1112	1	1112
1	86	7	1	0	0	0	1	0	0	0	0	0	0	0	NA	NA	0	0	1	226	1	226
2	86	8	0	1	1	0	0	1	1	0	0	0	0	0	carvedilol	doxazosin	0	0	0	2074	0	2074
1	86	9	0	0	1	0	1	0	0	0	1	0	0	0	NA	NA	0	0	1	354	1	354
2	93	8	0	0	0	1	0	0	0	0	0	0	0	1	NA	NA	0	0	1	94	1	94
2	86	7	0	0	1	1	0	0	1	0	1	0	1	1	NA	NA	0	0	0	2073	0	2073
1	86	12	0	0	0	1	0	0	1	0	0	0	1	0	NA	NA	0	0	1	52	1	52
2	86	5	0	0	0	0	1	0	0	1	0	0	1	0	NA	NA	0	0	1	535	1	535
2	86	11	0	0	1	0	1	1	0	0	1	0	0	1	carvedilol	NA	0	0	1	120	1	120
2	86	9	1	0	1	0	1	1	0	1	0	0	0	0	carvedilol	NA	0	0	1	441	1	35
1	86	12	0	0	1	0	1	0	0	0	0	0	0	0	NA	NA	0	0	1	448	1	448
2	93	8	0	0	0	1	0	0	0	0	0	0	1	1	NA	NA	0	1	1	307	1	307
2	86	8	0	0	1	0	0	0	1	0	0	0	0	0	NA	NA	0	1	1	1031	1	536
2	94	6	0	0	1	0	1	0	0	0	1	0	1	0	NA	NA	0	0	1	1132	1	1132
2	86	7	0	0	1	1	0	0	1	0	0	0	0	0	NA	NA	0	0	1	1267	1	1171
2	86	5	0	0	1	0	0	0	0	0	1	0	0	0	NA	NA	0	0	1	1798	1	1798
1	87	13	0	0	1	0	0	0	1	0	0	1	0	0	NA	NA	0	0	1	562	1	562
2	86	5	0	0	1	0	0	1	0	0	1	0	1	0	carvedilol	NA	0	1	1	1250	1	1250
1	86	5	0	0	1	0	0	0	0	0	0	0	0	0	NA	NA	0	0	1	1098	1	1098
2	86	5	1	0	1	0	0	0	0	0	0	1	0	0	NA	NA	0	0	1	27	1	27
2	86	14	0	0	1	0	0	1	0	0	0	0	1	0	metoprolol	NA	0	0	1	697	1	429
2	86	6	0	0	0	0	1	0	0	1	0	0	0	0	NA	NA	0	0	1	408	1	408
1	87	6	0	0	0	0	1	0	1	0	0	0	0	1	NA	NA	0	0	1	110	1	110
1	93	4	0	0	0	1	0	1	0	0	0	0	1	0	carvedilol	NA	0	1	1	1092	1	1092
2	87	6	0	0	1	0	0	0	1	1	0	0	0	0	NA	NA	0	1	0	1824	1	510
2	87	4	0	0	0	1	0	0	1	0	0	0	1	0	NA	NA	0	1	1	136	1	136
2	86	15	0	0	1	0	0	0	0	0	0	0	0	0	NA	NA	0	0	0	2035	1	515
2	86	7	0	0	1	0	0	1	1	0	0	0	0	0	carvedilol	NA	0	0	0	1961	0	1961
2	86	4	0	0	1	0	0	0	0	1	0	0	0	0	NA	NA	0	0	1	1890	1	1890
2	86	7	0	0	1	1	0	0	0	0	1	0	0	0	NA	NA	0	1	1	17	1	17
2	86	6	0	0	1	0	1	1	0	0	1	0	1	0	bisoprolol	NA	0	0	1	1834	1	1834
1	87	7	0	0	0	1	0	0	0	1	0	0	0	0	NA	NA	0	0	1	435	1	435
2	87	5	0	0	0	0	0	1	1	0	0	1	0	0	carvedilol	NA	0	0	1	1249	1	386
2	87	5	0	0	1	0	0	1	0	0	0	0	0	0	nebivolol	NA	0	0	1	1412	1	1412
2	86	6	0	0	1	0	0	0	0	0	0	1	1	0	NA	NA	0	0	1	1115	1	1115
2	87	32	0	1	1	0	0	1	1	0	1	0	0	0	metoprolol	doxazosin	0	1	1	48	1	48
2	86	7	0	0	1	0	0	1	1	0	0	0	1	1	carvedilol	NA	0	0	0	1992	0	1992
2	87	5	0	0	1	0	0	1	0	0	0	0	1	0	carvedilol	NA	0	0	1	936	1	936
1	87	6	0	0	1	0	1	0	1	0	1	0	0	0	NA	NA	0	0	0	1850	0	1850
2	87	19	0	0	0	1	1	0	1	0	0	0	0	1	NA	NA	0	1	1	92	1	92
2	87	4	0	0	0	1	1	1	1	0	0	0	0	0	nebivolol	NA	0	0	1	476	1	476
2	86	10	0	0	1	0	1	0	1	1	0	0	0	0	NA	NA	0	1	1	1341	1	1341
2	86	8	0	0	1	0	0	0	1	0	1	0	0	0	NA	NA	0	0	1	980	1	654
2	86	9	0	0	1	0	0	0	1	0	0	0	0	0	NA	NA	0	1	1	1663	1	1033
2	86	5	0	0	1	0	0	0	0	0	0	0	1	0	NA	NA	0	0	0	2131	0	2131
2	87	4	0	0	1	0	0	0	1	0	0	0	1	0	NA	NA	0	0	1	554	1	528
2	86	6	0	0	1	0	0	0	0	1	1	0	0	0	NA	NA	0	0	1	1159	1	1048
1	87	11	0	1	0	0	1	0	0	1	0	0	0	1	NA	doxazosin	0	0	0	1930	0	1930
1	86	15	0	0	0	0	1	1	1	1	0	0	0	0	carvedilol	NA	0	0	1	766	1	749
2	86	3	0	0	0	0	0	1	1	1	0	0	0	0	carvedilol	NA	0	0	1	437	1	437
2	86	8	0	0	1	0	0	0	0	0	1	0	0	0	NA	NA	0	0	1	1828	1	1828
2	87	17	0	0	0	0	0	1	0	0	0	1	0	0	nebivolol	NA	0	0	1	1076	1	1076
1	86	17	0	0	0	0	0	1	0	0	0	0	0	0	carvedilol	NA	0	0	1	121	1	8
2	86	7	0	0	0	0	1	1	1	0	0	0	0	0	carvedilol	NA	0	0	1	763	1	763
1	86	6	0	0	1	0	1	1	1	0	0	0	1	1	nebivolol	NA	0	1	1	1855	1	1855
1	86	6	0	0	1	0	0	0	0	0	0	0	1	0	NA	NA	0	0	0	2119	0	2119
1	86	8	0	0	1	0	0	1	1	0	1	0	1	0	carvedilol	NA	0	0	1	918	1	546
2	87	16	0	0	1	0	1	1	1	0	1	0	0	1	carvedilol	NA	0	1	1	838	1	838
2	87	6	0	0	1	0	1	0	0	0	1	0	1	1	NA	NA	0	0	1	383	1	383
2	87	7	0	0	1	0	0	0	1	0	0	0	1	0	NA	NA	0	0	1	918	1	802
2	87	3	0	0	1	0	1	0	0	0	0	0	0	0	NA	NA	0	0	1	419	1	419
2	100	6	0	0	0	0	0	1	0	0	0	0	1	0	metoprolol	NA	0	0	1	1167	1	1167
2	87	4	0	0	1	0	0	0	0	0	0	0	0	1	NA	NA	0	0	1	289	1	289
2	86	9	0	1	0	1	0	1	0	0	1	1	1	1	carvedilol	doxazosin	0	0	0	2039	0	2039
1	86	7	0	0	0	1	0	0	1	0	0	1	1	0	NA	NA	0	0	1	1358	1	825
2	86	13	0	0	0	1	0	1	1	0	0	0	0	1	metoprolol	NA	0	0	0	2005	0	2005
1	87	4	0	1	0	0	1	0	0	0	0	0	1	0	NA	doxazosin	1	1	0	1814	1	1534
2	86	8	0	0	1	1	0	1	1	0	0	0	0	0	other	NA	0	0	0	1990	0	1990
2	87	6	0	0	1	0	0	0	1	0	0	0	0	0	NA	NA	0	0	1	343	1	314
1	86	12	0	0	1	0	0	0	1	1	0	0	0	0	NA	NA	0	0	1	902	1	892
2	87	17	0	0	0	0	0	1	1	0	0	0	0	0	other	NA	0	0	1	1498	1	972
2	86	10	0	0	0	0	1	0	1	1	0	0	0	0	NA	NA	0	1	1	216	1	216
2	86	9	0	0	0	0	1	0	1	0	0	0	0	0	NA	NA	0	0	1	286	1	286
2	86	4	0	0	0	0	1	1	1	0	0	0	1	0	bisoprolol	NA	1	0	0	2063	0	2063
1	87	16	0	0	0	0	1	1	1	0	0	0	0	0	carvedilol	NA	0	0	0	1893	0	1893
2	87	7	0	0	0	0	1	0	1	0	0	0	1	0	NA	NA	0	0	1	128	1	128
2	87	6	0	0	1	0	0	0	1	0	0	0	0	0	NA	NA	0	0	1	765	1	765
2	93	7	0	0	0	0	1	0	1	1	0	0	1	0	NA	NA	0	1	1	540	1	540
2	86	13	0	0	1	0	1	0	1	0	0	0	0	1	NA	NA	0	0	1	1057	1	466
1	86	10	0	0	0	0	0	1	0	0	0	0	0	0	carvedilol	NA	0	0	1	585	1	585
2	86	4	0	0	1	0	0	0	1	0	0	0	1	0	NA	NA	0	0	0	2128	0	2128
2	86	8	0	0	1	0	0	0	0	0	0	0	0	0	NA	NA	0	0	1	604	1	604
2	93	6	0	1	0	0	0	1	1	0	1	0	0	0	metoprolol	doxazosin	0	0	1	256	1	256
2	86	5	0	0	1	0	0	1	1	1	0	1	0	0	other	NA	0	0	1	1858	1	223
1	86	13	0	0	1	0	1	0	1	1	0	0	0	1	NA	NA	0	0	1	369	1	369
2	86	6	0	0	1	0	0	1	0	1	0	1	0	0	carvedilol	NA	0	0	1	613	1	613
2	86	9	0	0	0	0	1	0	0	0	0	0	0	0	NA	NA	0	0	1	618	1	595
1	86	5	0	0	1	0	1	0	1	1	0	0	0	0	NA	NA	0	0	1	795	1	328
2	86	11	0	0	1	0	0	0	1	0	1	0	0	1	NA	NA	0	0	0	1999	0	1999
2	86	7	0	0	1	0	0	1	0	0	0	0	1	0	carvedilol	NA	0	0	1	1195	1	1195
2	87	3	0	0	1	1	1	0	1	0	0	0	0	0	NA	NA	0	0	1	500	1	500
2	86	6	0	0	1	0	0	0	0	0	0	0	0	0	NA	NA	0	1	1	142	1	142
1	86	6	0	0	0	0	1	0	0	0	1	0	0	1	NA	NA	0	0	1	455	1	455
2	86	5	0	0	0	0	0	1	1	0	0	0	0	0	carvedilol	NA	0	0	1	449	1	449
2	86	6	0	0	1	0	1	1	0	1	0	0	0	1	carvedilol	NA	0	0	1	350	1	350
2	86	2	0	0	0	0	0	1	0	0	0	0	1	0	carvedilol	NA	1	0	1	1378	1	1378
1	87	3	0	0	1	0	0	1	0	0	0	0	0	0	carvedilol	NA	1	0	1	1313	1	1313
2	86	4	0	0	0	1	0	0	0	0	0	0	0	0	NA	NA	0	0	1	834	1	834
2	87	6	0	0	0	0	0	1	0	0	0	0	1	1	carvedilol	NA	0	0	1	1143	1	917
2	86	14	0	0	1	0	0	0	0	0	0	1	0	1	NA	NA	1	0	1	1227	1	286
2	94	7	0	0	0	0	1	0	0	0	0	0	0	0	NA	NA	0	0	1	665	1	665
2	87	14	0	0	1	0	1	0	1	0	1	0	0	0	NA	NA	0	0	1	1261	1	1261
2	86	5	0	0	1	0	1	0	0	0	0	0	0	1	NA	NA	0	0	0	2061	0	2061
2	86	6	0	0	0	0	1	0	1	0	0	0	1	0	NA	NA	0	0	1	317	1	317
2	86	7	0	0	0	0	1	0	0	0	0	0	0	0	NA	NA	0	0	1	87	1	87
1	86	7	0	0	0	0	0	1	1	0	0	0	1	0	carvedilol	NA	0	0	1	391	1	334
1	86	5	1	0	1	0	0	1	1	0	0	0	1	1	carvedilol	NA	0	0	1	760	1	760
2	86	2	0	0	1	0	0	0	0	0	0	0	1	0	NA	NA	0	0	0	2026	0	2026
1	86	5	0	0	0	0	0	1	0	0	0	0	0	0	carvedilol	NA	0	0	1	73	1	73
2	86	9	0	0	0	1	1	0	1	0	1	0	0	1	NA	NA	0	0	0	2035	0	2035
2	86	7	0	0	1	0	0	1	1	0	0	0	0	0	carvedilol	NA	0	0	0	1940	0	1940
2	86	8	0	0	0	1	0	0	0	0	0	0	0	1	NA	NA	0	1	1	1510	1	1395
2	86	6	0	0	0	1	0	0	1	0	0	0	0	0	NA	NA	0	0	1	1754	1	1754
2	87	3	0	0	0	0	1	0	1	0	1	0	1	1	NA	NA	0	0	1	485	1	480
1	86	5	0	0	1	0	0	0	1	0	0	0	1	0	NA	NA	0	0	1	1243	1	1243
1	87	5	0	0	0	0	0	1	1	0	0	0	0	0	carvedilol	NA	0	0	1	102	1	102
1	86	5	0	0	1	0	0	0	0	0	1	0	0	0	NA	NA	0	0	0	2032	0	2032
2	86	6	0	0	1	0	0	0	0	0	1	0	0	0	NA	NA	0	0	0	2014	0	2014
2	87	6	0	0	1	0	1	0	0	1	0	0	0	0	NA	NA	0	0	1	1131	1	1131
2	87	4	0	0	1	0	1	0	0	0	0	0	0	0	NA	NA	0	1	1	1191	1	1191
1	87	13	0	0	1	0	1	0	1	0	0	0	0	1	NA	NA	0	0	1	510	1	489
2	87	8	0	0	0	1	1	0	1	0	0	0	0	1	NA	NA	0	1	0	1864	0	1864
2	86	10	0	0	1	0	0	0	0	0	0	0	0	0	NA	NA	0	0	1	1030	1	1030
2	86	2	0	0	1	0	0	1	0	1	0	0	0	0	metoprolol	NA	0	1	1	373	1	373
2	86	6	0	0	1	0	1	0	0	1	0	0	1	0	NA	NA	0	1	1	23	1	23
2	93	5	0	0	0	1	0	1	1	0	0	0	0	0	carvedilol	NA	0	1	1	521	1	521
2	87	3	0	0	1	0	0	0	1	0	1	0	1	0	NA	NA	0	0	1	173	1	173
2	86	6	0	0	1	0	0	0	0	0	0	0	0	0	NA	NA	0	0	1	400	1	400
1	87	12	0	0	0	0	0	1	1	1	0	0	1	0	bisoprolol	NA	0	0	1	44	1	44
1	86	6	0	0	0	0	1	0	1	0	0	0	0	0	NA	NA	0	0	1	952	1	715
2	86	4	0	0	1	1	0	1	0	0	1	0	0	0	other	NA	0	0	1	1	1	1
2	87	8	0	0	0	0	0	1	0	0	0	0	0	0	carvedilol	NA	0	0	1	1395	1	1395
1	86	5	0	0	0	0	1	0	1	1	0	0	0	1	NA	NA	0	1	0	2153	0	2153
1	86	2	0	0	1	0	0	1	0	0	0	0	0	0	other	NA	0	0	0	2072	0	2072
1	87	5	0	0	1	0	0	0	1	0	0	0	1	0	NA	NA	0	0	1	1226	1	98
2	86	10	0	0	0	0	1	0	0	0	0	0	1	0	NA	NA	0	0	0	2084	1	1207
2	86	14	0	0	1	0	0	0	0	0	0	1	1	0	NA	NA	0	0	1	1052	1	1052
2	86	7	0	0	1	0	0	1	0	0	1	0	0	0	carvedilol	NA	0	0	1	319	1	317
2	87	8	0	0	1	0	0	0	1	0	0	0	1	0	NA	NA	0	0	0	1906	0	1906
2	87	6	0	0	1	0	0	1	1	0	0	0	1	1	carvedilol	NA	0	0	0	1804	0	1804
2	87	17	0	1	0	1	0	1	0	1	0	0	0	1	nebivolol	doxazosin	0	0	1	467	1	467
2	87	11	0	0	1	0	1	1	1	0	0	0	1	0	metoprolol	NA	0	1	1	1349	1	1349
2	86	3	0	0	1	0	1	0	1	0	1	0	0	0	NA	NA	0	0	0	2101	1	1342
1	87	4	0	0	1	0	0	1	0	0	1	0	0	0	metoprolol	NA	0	0	1	1604	1	103
1	87	7	0	0	1	0	0	1	1	0	0	0	1	0	carvedilol	NA	0	0	1	141	1	141
2	87	6	0	0	1	0	1	0	0	0	0	0	1	1	NA	NA	0	0	1	32	1	32
2	86	5	0	0	0	1	0	1	0	0	0	0	0	0	nebivolol	NA	0	0	1	1458	1	642
2	86	15	0	0	0	0	1	1	1	0	0	0	0	0	bisoprolol	NA	0	0	1	14	1	14
2	87	6	0	0	1	0	0	0	1	0	1	0	1	0	NA	NA	0	1	0	1821	0	1821
1	86	5	0	1	0	1	1	0	0	1	0	1	1	0	NA	doxazosin	0	0	1	977	1	977
1	87	4	0	0	1	0	0	1	1	0	0	0	1	1	bisoprolol	NA	0	1	1	1285	1	1285
1	86	7	0	0	1	0	0	0	0	0	0	0	0	0	NA	NA	0	0	1	583	1	583
2	86	8	0	0	0	0	1	1	1	1	1	1	1	0	carvedilol	NA	0	1	1	732	1	732
1	87	17	0	0	1	0	1	0	0	0	0	0	1	0	NA	NA	0	0	1	760	1	702
1	86	5	0	0	0	0	1	1	1	0	0	0	1	1	nebivolol	NA	1	1	1	753	1	753
2	86	7	0	0	1	0	0	0	1	1	1	1	0	1	NA	NA	0	0	1	1720	1	1720
2	86	8	0	0	1	0	1	0	1	0	0	0	1	1	NA	NA	0	1	1	575	1	575
2	87	7	0	0	1	0	0	0	1	0	0	0	1	1	NA	NA	0	1	1	165	1	165
2	93	9	0	0	0	0	0	1	1	0	0	0	0	0	carvedilol	NA	0	0	1	1777	1	1777
1	86	4	0	0	1	0	1	0	1	1	0	1	0	0	NA	NA	0	0	1	906	1	906
1	86	4	0	1	1	1	0	1	1	0	1	0	1	0	metoprolol	doxazosin	0	1	1	913	1	894
1	86	7	0	0	0	1	0	0	1	0	0	0	0	0	NA	NA	0	0	0	1989	0	1989
2	86	18	0	0	0	1	1	0	1	1	0	0	0	0	NA	NA	0	1	1	1992	1	1992
1	87	4	0	0	0	0	0	1	0	0	0	1	1	0	nebivolol	NA	0	0	1	100	1	100
2	86	3	0	0	1	0	0	0	0	0	0	0	1	0	NA	NA	0	0	0	2112	0	2112
2	86	14	1	0	1	0	0	1	1	1	0	0	1	1	nebivolol	NA	0	0	1	1265	1	1265
2	86	7	0	0	0	1	0	0	1	0	0	0	0	0	NA	NA	0	0	1	465	1	465
2	86	5	1	0	1	0	0	1	1	0	0	1	1	0	bisoprolol	NA	0	0	0	2075	0	2075
2	87	4	0	0	1	0	1	0	0	0	1	0	1	0	NA	NA	0	0	1	1412	1	80
2	86	4	0	0	1	0	0	1	1	0	0	0	0	0	metoprolol	NA	0	0	1	81	1	81
2	87	4	0	0	0	0	1	0	0	0	0	0	0	0	NA	NA	0	0	0	1860	0	1860
1	86	7	0	0	1	0	0	0	0	0	0	0	1	0	NA	NA	0	0	1	698	1	698
2	93	13	0	0	0	0	1	0	0	1	0	0	1	0	NA	NA	0	0	1	86	1	86
2	87	9	0	0	1	0	1	1	1	0	0	0	0	0	carvedilol	NA	0	0	1	336	1	336
2	93	6	0	0	1	0	0	0	0	0	0	0	0	0	NA	NA	0	0	1	307	1	100
2	87	5	0	0	0	0	1	0	1	0	0	0	0	0	NA	NA	0	1	1	49	1	49
2	87	7	0	0	1	0	0	0	0	0	1	0	0	0	NA	NA	0	0	0	1829	0	1829
2	86	8	0	0	1	0	0	0	0	0	0	0	0	0	NA	NA	0	0	1	1990	1	1990
2	86	4	0	0	1	0	1	0	0	0	1	0	1	1	NA	NA	0	0	1	966	1	966
2	86	14	0	0	1	0	0	1	0	0	0	0	1	0	bisoprolol	NA	0	1	1	1253	1	1253
1	86	14	0	1	0	0	0	1	0	0	0	1	1	1	other	doxazosin	1	0	0	1962	0	1962
2	86	5	0	0	0	1	0	0	1	0	0	0	0	0	NA	NA	0	0	1	1615	1	1615
2	86	6	0	0	1	0	0	0	0	0	0	0	0	0	NA	NA	0	0	1	40	1	40
2	87	7	0	0	0	1	1	1	1	0	0	1	0	0	other	NA	0	0	0	1800	1	228
1	86	3	0	0	1	0	1	0	0	0	0	0	1	0	NA	NA	0	0	1	934	1	803
1	87	9	0	1	0	1	0	1	0	0	1	0	0	0	nebivolol	doxazosin	0	1	1	808	1	808
2	86	2	0	0	1	0	0	1	0	0	0	0	0	0	carvedilol	NA	0	0	1	907	1	907
1	87	6	0	0	1	0	0	0	0	0	0	0	1	0	NA	NA	0	0	1	406	1	406
2	86	6	0	0	1	0	0	1	1	0	1	0	0	0	carvedilol	NA	0	0	1	941	1	941
2	93	11	0	0	0	1	0	0	1	1	0	0	0	0	NA	NA	0	0	1	278	1	278
2	86	5	0	0	1	0	1	0	1	1	1	0	1	0	NA	NA	0	0	1	651	1	651
2	86	7	0	0	1	0	1	0	1	0	0	0	1	0	NA	NA	0	0	0	2132	0	2132
2	86	6	0	0	1	0	0	0	1	1	0	0	0	0	NA	NA	0	0	1	231	1	206
2	86	13	0	0	1	0	0	0	1	0	1	0	0	1	NA	NA	0	0	1	1108	1	1108
2	87	7	0	0	0	0	0	1	0	0	0	0	1	0	carvedilol	NA	0	0	1	53	1	53
2	86	3	0	0	1	0	0	0	1	0	0	0	0	0	NA	NA	0	0	1	147	1	147
2	87	5	0	0	1	0	1	0	0	0	0	0	0	0	NA	NA	1	0	1	1107	1	1107
1	86	10	0	0	1	0	1	1	1	1	0	1	0	1	carvedilol	NA	0	1	1	437	1	215
2	87	6	0	0	1	0	0	0	1	1	0	1	0	0	NA	NA	0	1	1	271	1	271
1	86	7	0	0	1	0	0	0	1	0	0	0	0	0	NA	NA	0	0	1	434	1	434
1	87	6	1	0	1	0	0	1	1	0	0	0	0	0	metoprolol	NA	0	0	1	955	1	955
2	86	20	1	0	1	0	0	0	1	1	1	1	1	0	NA	NA	0	0	1	31	1	31
2	86	2	0	0	1	0	1	0	1	0	1	0	1	0	NA	NA	1	0	1	128	1	128
2	86	3	0	0	1	0	0	1	0	1	0	0	0	0	metoprolol	NA	0	0	0	2024	0	2024
2	86	3	0	0	1	0	0	0	1	0	1	0	0	0	NA	NA	0	0	0	2056	0	2056
1	86	26	1	0	1	0	0	0	1	0	0	0	1	1	NA	NA	0	0	1	665	1	665
2	86	9	0	0	0	0	0	1	0	1	0	0	0	0	carvedilol	NA	0	0	1	70	1	70
1	87	8	0	0	0	0	0	1	1	0	0	0	0	0	carvedilol	NA	0	0	1	147	1	147
2	87	4	0	0	0	0	0	1	0	0	0	0	0	0	carvedilol	NA	0	0	1	87	1	83
1	87	10	0	0	0	0	1	1	1	0	0	1	0	0	carvedilol	NA	0	0	0	1820	1	278
1	86	11	0	0	1	0	1	0	1	0	0	0	0	0	NA	NA	0	0	1	1214	1	1214
2	87	5	0	0	1	0	1	0	1	1	0	1	0	0	NA	NA	0	0	1	1371	1	1371
2	86	4	0	0	1	0	1	1	1	1	0	0	0	0	carvedilol	NA	0	0	1	419	1	419
2	87	8	0	0	0	1	0	1	0	0	1	1	1	1	other	NA	0	0	0	1821	1	58
1	86	8	0	0	1	0	1	0	0	0	0	0	0	1	NA	NA	0	0	1	1818	1	687
2	86	11	0	0	0	0	1	0	0	1	0	1	1	0	NA	NA	0	0	0	2054	0	2054
2	87	6	0	0	1	0	1	0	0	0	1	0	0	1	NA	NA	0	0	1	529	1	529
1	87	5	0	0	1	0	1	0	1	0	0	1	0	0	NA	NA	0	1	1	863	1	863
2	86	6	0	0	0	1	0	1	1	0	1	0	1	1	carvedilol	NA	0	0	1	637	1	68
2	86	6	0	0	1	0	1	0	0	0	0	0	0	1	NA	NA	0	0	1	688	1	688
2	87	7	0	0	1	0	1	0	1	0	0	0	0	0	NA	NA	0	1	0	1830	0	1830
2	86	7	0	0	1	0	1	1	1	0	0	0	1	0	carvedilol	NA	0	0	1	1312	1	1312
1	86	4	0	0	0	0	1	0	0	0	0	0	1	1	NA	NA	0	0	1	1384	1	1384
2	87	10	1	0	0	0	1	1	1	0	0	0	0	0	carvedilol	NA	0	0	1	976	1	964
2	86	3	0	0	1	0	1	0	1	0	0	0	0	1	NA	NA	0	0	1	1546	1	1546
2	87	6	0	0	1	0	0	0	0	0	0	0	1	0	NA	NA	0	1	0	1836	0	1836
2	86	7	0	0	1	0	0	0	1	0	0	0	1	0	NA	NA	0	0	1	613	1	374
1	87	4	0	0	1	0	0	0	1	0	0	0	0	0	NA	NA	0	0	1	325	1	5
1	86	2	0	0	1	0	1	1	0	0	0	0	0	1	carvedilol	NA	0	1	1	1831	1	1831
2	86	19	1	0	0	0	1	0	0	0	0	0	0	1	NA	NA	1	0	0	2010	0	2010
2	86	6	0	0	1	1	0	0	1	0	0	1	1	0	NA	NA	0	0	0	1957	0	1957
2	86	13	0	0	1	0	0	1	1	1	0	1	1	0	metoprolol	NA	0	0	1	386	1	386
2	86	8	0	0	1	0	0	0	1	0	1	0	0	0	NA	NA	0	1	0	2063	0	2063
2	86	2	1	0	0	0	1	0	0	0	1	0	0	1	NA	NA	0	0	1	869	1	850
2	87	13	0	0	1	0	1	0	1	1	0	0	0	1	NA	NA	0	0	1	785	1	785
1	86	21	0	0	1	0	0	0	0	0	0	0	0	0	NA	NA	0	0	1	142	1	142
1	87	12	0	0	1	0	0	0	1	0	1	1	1	0	NA	NA	0	0	1	1107	1	911
2	87	15	0	0	1	0	1	0	0	1	0	0	0	0	NA	NA	0	0	1	1639	1	1639
2	86	9	0	0	1	0	0	1	0	0	0	0	0	0	other	NA	0	0	1	1714	1	1714
2	86	4	0	0	1	0	0	0	0	0	0	0	1	1	NA	NA	0	0	1	5	1	5
2	87	4	0	0	1	0	0	1	1	0	0	0	1	1	carvedilol	NA	0	1	1	603	1	603
2	86	6	0	0	0	0	1	0	1	0	0	0	0	0	NA	NA	0	0	1	1264	1	1264
1	86	7	0	0	0	0	1	0	1	1	0	0	0	0	NA	NA	0	0	1	502	1	502
1	86	7	0	1	0	0	1	1	0	0	0	1	0	1	other	doxazosin	0	0	0	2122	0	2122
1	87	3	0	0	1	0	0	1	0	0	0	0	1	0	carvedilol	NA	0	0	1	1603	1	1603
2	86	7	0	0	1	0	1	0	1	1	1	0	0	0	NA	NA	0	0	1	1939	1	1939
2	86	6	0	0	0	0	1	0	0	0	0	0	0	1	NA	NA	0	0	1	1010	1	918
2	87	6	0	0	0	1	0	0	1	0	1	0	1	1	NA	NA	0	0	0	1843	0	1843
2	86	8	0	0	1	0	1	0	0	0	1	0	1	0	NA	NA	0	0	1	609	1	599
2	87	3	0	0	1	0	0	1	0	0	1	0	0	0	nebivolol	NA	0	0	0	1835	0	1835
2	86	4	0	0	1	0	0	1	1	0	0	0	0	0	bisoprolol	NA	0	0	1	932	1	925
2	87	7	0	0	1	0	1	0	0	0	0	1	0	0	NA	NA	0	0	0	1821	0	1821
1	86	6	0	0	0	0	0	1	1	0	0	0	1	0	bisoprolol	NA	0	0	1	1516	1	614
2	86	6	0	0	0	1	0	1	0	0	1	0	0	0	bisoprolol	NA	0	0	1	1331	1	678
2	87	10	0	0	1	0	0	0	1	1	0	1	1	0	NA	NA	0	0	1	691	1	691
2	86	3	0	0	0	0	0	1	1	0	0	0	0	0	metoprolol	NA	0	0	1	1573	1	1573
2	86	13	0	0	0	1	0	1	0	0	0	0	0	0	bisoprolol	NA	0	0	0	2032	0	2032
2	87	5	0	0	1	0	0	0	1	0	0	0	0	1	NA	NA	0	1	1	316	1	266
1	93	7	0	0	0	0	1	0	1	0	0	0	0	0	NA	NA	0	0	0	1909	0	1909
2	86	10	0	0	1	0	0	1	0	1	0	0	0	0	carvedilol	NA	0	0	1	1530	1	1530
2	86	8	0	0	1	0	0	0	0	0	0	0	1	0	NA	NA	0	1	1	386	1	372
2	86	5	1	0	1	0	0	1	1	0	0	0	1	0	carvedilol	NA	0	1	1	2	1	2
2	86	10	0	0	1	1	0	1	1	0	1	0	0	1	carvedilol	NA	0	0	1	1154	1	1154
2	100	7	0	0	1	0	0	0	1	1	0	0	0	0	NA	NA	0	0	1	51	1	51
2	86	6	0	0	0	0	0	1	0	1	0	1	1	1	metoprolol	NA	0	0	1	1772	1	1772
1	86	6	0	0	1	0	0	0	0	0	0	0	1	0	NA	NA	0	0	1	998	1	998
2	86	8	0	0	1	1	1	1	1	0	1	1	1	0	carvedilol	NA	0	1	1	224	1	224
1	86	13	0	0	0	0	1	1	1	0	0	1	0	1	carvedilol	NA	0	0	1	930	1	19
1	86	10	0	0	1	0	1	0	1	1	0	1	1	0	NA	NA	0	1	1	1953	1	1953
2	86	4	0	0	1	0	0	0	1	0	0	0	0	1	NA	NA	0	0	0	2020	1	954
2	86	7	0	0	0	0	1	0	1	1	0	1	0	1	NA	NA	0	0	1	796	1	796
1	86	5	0	0	1	0	1	0	0	0	0	0	1	0	NA	NA	0	0	1	66	1	66
2	87	4	0	0	0	0	0	1	1	0	0	0	1	0	bisoprolol	NA	0	1	1	372	1	372
1	86	5	0	0	1	0	0	0	1	0	1	0	0	1	NA	NA	0	0	1	787	1	787
2	87	10	0	0	1	0	1	1	1	1	0	0	1	1	nebivolol	NA	0	1	1	404	1	404
1	86	9	0	0	1	0	0	0	0	0	0	0	1	0	NA	NA	0	0	1	872	1	872
2	86	9	1	0	1	0	1	1	0	0	0	0	0	0	carvedilol	NA	0	0	1	361	1	361
2	93	12	0	0	1	0	0	0	0	1	0	0	0	0	NA	NA	0	0	1	84	1	84
2	86	19	0	0	1	0	0	1	0	1	0	0	0	1	carvedilol	NA	0	0	1	462	1	418
2	86	3	0	0	1	0	0	0	0	0	1	0	0	0	NA	NA	0	0	0	2079	0	2079
2	86	12	0	0	1	0	1	0	1	1	0	0	0	0	NA	NA	0	1	1	1447	1	1447
2	86	6	0	0	1	0	0	0	1	1	0	0	0	0	NA	NA	0	0	1	281	1	276
2	86	10	0	0	1	0	0	1	1	0	0	0	0	0	metoprolol	NA	0	0	0	1961	0	1961
2	86	7	0	0	1	0	1	0	0	0	1	0	0	0	NA	NA	0	0	1	1157	1	1157
2	87	4	0	0	1	0	0	0	1	1	0	0	0	0	NA	NA	0	0	1	559	1	557
2	100	3	0	0	0	0	0	1	1	0	0	0	0	1	carvedilol	NA	0	0	1	37	1	37
2	86	5	0	0	1	0	0	1	0	0	1	0	1	0	carvedilol	NA	0	0	1	166	1	166
1	93	7	0	1	1	0	0	0	1	0	1	0	0	0	NA	doxazosin	0	0	1	1379	1	1379
1	87	5	0	0	1	0	0	1	0	0	0	0	1	0	nebivolol	NA	0	0	1	1199	1	1199
2	87	8	0	0	1	0	0	0	0	0	0	0	0	0	NA	NA	0	0	1	539	1	539
2	86	5	0	0	1	0	1	1	0	0	0	1	0	0	carvedilol	NA	0	1	1	1138	1	1055
1	86	13	0	0	1	0	0	1	1	0	0	0	0	0	nebivolol	NA	0	0	1	259	1	259
2	87	5	0	0	1	1	1	1	1	0	0	0	0	0	nebivolol	NA	0	0	0	1796	0	1796
2	86	7	0	0	1	0	0	0	1	0	1	0	0	0	NA	NA	0	0	0	1954	0	1954
2	93	6	0	0	1	0	0	0	0	0	0	0	0	0	NA	NA	0	0	1	238	1	238
1	86	3	0	0	1	0	1	1	1	0	0	0	0	0	carvedilol	NA	0	1	1	1081	1	1081
2	86	5	0	0	1	0	1	0	1	0	0	0	1	0	NA	NA	0	1	1	1074	1	1074
2	93	7	0	0	0	0	1	0	0	1	0	1	0	0	NA	NA	0	0	1	1259	1	1251
2	86	9	0	0	0	1	1	0	1	1	0	0	0	0	NA	NA	0	1	0	1934	0	1934
1	86	3	0	0	0	0	0	1	0	0	0	1	1	0	other	NA	0	0	0	1906	1	621
1	86	7	0	0	1	0	1	1	1	0	0	1	0	0	carvedilol	NA	0	0	0	2129	1	628
2	86	13	0	0	1	0	0	0	0	0	0	0	1	0	NA	NA	0	1	0	2117	1	207
1	87	14	0	0	0	0	0	1	1	0	0	0	0	1	carvedilol	NA	0	1	1	345	1	345
2	86	6	0	0	0	0	0	1	1	0	0	0	1	0	carvedilol	NA	0	0	0	1914	0	1914
2	87	6	0	0	1	0	0	1	0	1	0	0	0	0	carvedilol	NA	0	0	1	397	1	397
1	86	11	0	0	1	0	1	0	1	0	0	0	0	0	NA	NA	0	0	1	591	1	59
1	87	15	0	0	0	0	1	1	1	0	0	0	0	0	carvedilol	NA	0	0	1	85	1	85
1	86	8	0	0	0	0	1	1	1	0	0	0	0	0	carvedilol	NA	0	0	1	95	1	95
2	86	10	0	0	1	0	0	0	1	0	0	0	1	1	NA	NA	0	0	0	1906	0	1906
2	86	4	0	0	1	0	0	0	1	0	0	1	0	0	NA	NA	0	0	0	1984	0	1984
2	86	1	0	0	1	0	0	0	0	0	1	0	0	0	NA	NA	0	0	1	1454	1	1454
2	86	6	0	0	0	0	1	0	0	1	0	0	0	0	NA	NA	0	0	1	242	1	242
1	86	5	0	0	1	0	0	0	0	0	0	0	1	0	NA	NA	0	0	0	2063	0	2063
1	86	4	0	0	0	0	1	0	0	0	0	0	0	0	NA	NA	0	0	1	1374	1	1374
1	86	11	0	0	1	0	1	0	1	0	0	0	0	1	NA	NA	0	0	1	401	1	401
2	87	6	0	0	1	0	0	0	0	0	0	0	0	0	NA	NA	0	0	0	1892	0	1892
2	86	7	0	0	1	0	1	0	0	0	0	0	0	0	NA	NA	0	0	1	431	1	431
1	86	17	0	0	1	0	1	1	1	0	0	1	1	0	carvedilol	NA	0	0	1	741	1	741
2	87	11	0	0	0	0	1	0	0	1	0	0	0	0	NA	NA	0	0	1	1460	1	774
1	86	3	0	1	1	0	1	0	1	1	0	0	0	0	NA	doxazosin	0	0	1	1563	1	1563
2	86	15	0	0	0	0	0	1	0	0	0	0	1	1	other	NA	0	0	1	1125	1	1115
2	86	6	0	0	1	0	0	0	0	0	0	0	1	0	NA	NA	0	1	0	2089	0	2089
2	86	7	0	0	0	0	1	1	1	1	0	0	0	0	carvedilol	NA	0	0	1	182	1	182
2	86	12	0	0	1	0	0	0	0	0	0	0	1	1	NA	NA	0	0	0	2096	0	2096
2	93	11	0	0	1	0	1	0	1	0	1	0	0	0	NA	NA	0	1	1	41	1	41
1	86	13	0	0	1	0	0	1	0	1	0	0	0	0	nebivolol	NA	0	0	1	764	1	749
2	86	4	0	0	1	1	0	0	1	1	1	0	1	1	NA	NA	0	0	0	1972	0	1972
2	87	8	0	0	1	0	0	1	0	0	0	0	0	1	metoprolol	NA	0	0	0	1884	1	372
2	93	23	0	0	0	0	0	1	0	0	0	0	0	0	nebivolol	NA	0	1	1	283	1	283
2	87	6	0	0	1	0	0	0	1	0	1	0	0	0	NA	NA	0	0	0	1810	1	716
2	87	9	0	1	1	0	0	0	0	0	0	0	0	0	NA	doxazosin	0	0	1	1043	1	159
2	86	11	0	0	1	0	0	0	1	1	0	0	1	0	NA	NA	0	0	1	1237	1	124
2	93	11	0	0	1	0	0	0	0	1	0	0	0	0	NA	NA	0	0	1	573	1	551
2	86	6	0	0	0	0	0	1	1	0	0	0	0	0	carvedilol	NA	0	0	1	524	1	524
1	87	11	0	0	0	0	1	1	0	1	0	0	1	0	carvedilol	NA	0	0	1	423	1	423
2	86	5	0	0	1	0	0	0	0	0	0	0	1	0	NA	NA	0	0	1	1900	1	1900
2	93	3	0	0	1	0	0	0	1	1	0	0	1	0	NA	NA	0	0	1	1363	1	1363
2	86	6	0	0	1	0	0	0	1	0	0	0	0	0	NA	NA	0	0	1	1587	1	1587
2	87	7	0	1	1	0	0	0	1	0	1	0	1	1	NA	doxazosin	0	0	0	1867	1	2
2	86	3	0	0	1	0	0	0	1	0	1	0	0	0	NA	NA	0	0	0	1949	0	1949
2	87	5	0	0	1	0	1	1	0	1	0	1	1	0	nebivolol	NA	0	0	1	1622	1	1622
2	86	10	0	0	1	0	1	1	1	0	0	0	0	0	carvedilol	NA	0	0	1	1600	1	882
2	94	9	0	0	1	0	1	0	0	0	0	0	0	0	NA	NA	0	0	1	43	1	43
2	87	11	0	0	0	0	1	0	0	0	0	0	0	0	NA	NA	0	0	1	1531	1	1531
2	86	9	1	0	0	1	0	0	0	0	0	1	1	0	NA	NA	0	0	1	1923	1	1923
2	86	4	0	0	0	1	0	0	0	0	1	0	1	0	NA	NA	0	0	0	2021	1	634
2	86	14	0	0	1	0	0	1	0	0	1	0	0	1	carvedilol	NA	0	0	0	2124	0	2124
2	87	4	0	0	1	0	0	1	1	0	0	1	0	0	carvedilol	NA	0	0	0	1803	0	1803
2	93	4	0	0	1	0	0	0	0	0	0	0	0	0	NA	NA	0	0	1	872	1	872
2	86	15	0	0	0	0	0	1	1	0	0	0	0	0	metoprolol	NA	0	0	1	698	1	682
2	86	7	0	0	1	0	0	0	0	0	0	0	0	0	NA	NA	0	0	1	940	1	940
2	86	3	0	0	1	0	0	0	0	0	0	0	1	1	NA	NA	0	0	1	1705	1	1705
2	86	5	0	0	0	1	0	0	0	0	0	0	0	0	NA	NA	0	0	0	2075	0	2075
2	93	22	0	0	1	0	0	0	1	0	0	0	0	0	NA	NA	0	0	0	2116	0	2116
2	87	4	0	0	0	1	0	1	1	0	0	0	0	1	carvedilol	NA	0	1	1	1130	1	1130
2	86	6	0	0	1	0	0	1	1	0	1	0	1	0	bisoprolol	NA	0	0	0	1951	0	1951
1	87	11	0	0	1	0	1	0	1	0	0	0	0	1	NA	NA	0	0	1	317	1	317
2	86	3	0	0	0	1	1	1	1	0	1	0	1	1	carvedilol	NA	0	0	1	1689	1	1689
2	87	3	0	0	1	0	0	0	0	0	0	1	0	1	NA	NA	0	0	1	116	1	104
2	87	8	0	0	0	1	0	1	1	0	0	0	0	0	nebivolol	NA	0	0	1	406	1	406
2	86	4	0	0	0	0	1	0	0	0	0	0	0	0	NA	NA	0	0	1	873	1	873
2	86	9	0	0	1	0	0	1	0	1	0	0	0	1	carvedilol	NA	0	0	1	173	1	172
2	86	4	0	0	1	0	1	1	0	0	0	0	0	0	nebivolol	NA	0	0	0	2014	0	2014
2	86	12	0	0	0	0	1	0	0	0	0	0	0	1	NA	NA	0	0	1	987	1	987
2	93	7	0	0	1	0	1	0	1	0	0	0	1	0	NA	NA	0	0	1	286	1	286
1	86	7	0	0	0	0	1	1	0	1	0	0	0	0	nebivolol	NA	0	0	1	580	1	580
1	86	5	0	0	1	0	1	0	1	0	1	0	0	0	NA	NA	0	1	1	1836	1	1836
1	86	8	0	0	1	0	1	1	1	0	0	0	0	1	carvedilol	NA	0	0	1	1667	1	1667
2	86	5	0	0	1	0	1	1	1	0	0	0	0	1	carvedilol	NA	0	0	0	1935	0	1935
1	86	28	0	0	1	0	0	0	1	1	0	0	0	1	NA	NA	0	0	1	1555	1	1555
2	86	12	0	0	0	0	1	0	1	0	0	0	0	1	NA	NA	0	0	1	1790	1	1790
2	87	5	0	0	1	0	0	0	1	0	1	1	0	0	NA	NA	0	0	1	751	1	622
2	86	7	0	0	0	1	0	0	0	0	0	0	0	1	NA	NA	0	0	1	411	1	411
2	86	6	0	0	1	0	0	1	0	0	0	0	0	0	carvedilol	NA	0	0	1	427	1	427
2	93	7	0	0	1	0	0	0	0	0	0	0	0	1	NA	NA	0	0	1	687	1	687
2	86	11	0	0	0	0	1	0	0	0	0	0	0	1	NA	NA	0	0	1	814	1	813
1	86	5	0	0	0	0	1	0	1	0	0	0	0	0	NA	NA	0	0	1	1163	1	1163
2	93	6	0	0	0	0	1	0	1	0	0	0	0	0	NA	NA	0	0	1	247	1	247
2	86	5	0	0	1	0	0	1	0	1	0	0	0	0	carvedilol	NA	0	0	0	1902	0	1902
2	86	5	0	0	1	0	0	0	0	0	1	0	0	0	NA	NA	0	0	1	90	1	90
1	86	3	0	0	1	0	0	0	1	0	0	0	0	0	NA	NA	0	0	1	51	1	51
2	86	3	0	0	1	0	0	0	1	0	0	0	0	1	NA	NA	0	0	1	1306	1	1306
1	87	13	0	1	0	0	0	1	1	0	0	0	0	0	nebivolol	doxazosin	0	0	1	912	1	912
2	86	6	0	0	1	0	1	0	1	0	0	0	1	0	NA	NA	0	0	1	448	1	420
1	86	6	0	0	0	1	1	1	1	0	1	0	0	0	carvedilol	NA	0	0	1	1274	1	1274
2	86	4	0	0	1	0	0	1	1	0	0	0	1	1	carvedilol	NA	0	0	1	350	1	350
1	86	9	0	0	1	0	0	1	0	0	0	0	0	0	carvedilol	NA	0	0	1	464	1	464
1	94	7	0	0	0	0	1	0	0	0	0	0	0	1	NA	NA	0	0	1	449	1	445
1	86	3	0	0	1	0	0	0	0	0	0	0	0	0	NA	NA	0	0	1	72	1	72
2	94	7	0	0	1	0	1	1	0	1	0	0	0	0	other	NA	0	0	1	28	1	28
2	86	20	0	0	1	0	0	1	0	0	0	0	1	1	carvedilol	NA	0	0	1	12	1	12
2	86	3	0	0	1	0	1	0	1	0	0	0	0	0	NA	NA	0	0	1	1010	1	1010
2	86	4	0	0	1	0	0	0	1	1	0	0	0	0	NA	NA	0	0	1	1811	1	799
2	86	7	0	0	0	0	1	1	0	0	0	0	1	1	carvedilol	NA	0	0	1	1653	1	1653
1	86	12	0	0	0	0	1	0	0	0	0	0	0	0	NA	NA	0	0	1	747	1	646
2	86	3	0	0	1	0	0	0	1	0	0	0	1	0	NA	NA	0	0	1	1289	1	1289
2	86	7	0	0	0	0	1	0	1	0	0	0	0	0	NA	NA	0	0	0	2039	1	1200
2	86	6	0	0	1	0	0	0	1	0	0	0	0	0	NA	NA	0	0	1	398	1	398
2	86	7	0	0	0	0	1	1	1	0	0	0	1	0	metoprolol	NA	0	0	1	114	1	114
2	87	6	0	0	1	0	0	0	0	0	0	0	1	0	NA	NA	0	0	0	1830	0	1830
2	86	4	0	0	1	0	0	0	0	0	0	1	1	0	NA	NA	0	0	1	546	1	546
1	87	4	1	0	1	0	1	0	1	0	1	0	0	0	NA	NA	0	0	1	1147	1	1147
1	86	10	0	1	0	0	1	0	1	0	0	0	0	0	NA	doxazosin	0	0	1	1637	1	1637
2	93	9	0	0	0	0	0	1	0	0	0	0	0	0	carvedilol	NA	0	0	1	103	1	103
1	86	11	0	0	0	0	1	1	1	1	1	1	0	0	metoprolol	NA	0	0	1	1375	1	694
1	86	6	0	1	0	1	0	0	0	0	0	0	0	0	NA	doxazosin	0	0	1	1820	1	1820
2	87	13	0	0	1	0	1	1	1	0	0	1	0	0	carvedilol	NA	0	0	1	1408	1	1408
2	86	4	0	0	1	0	0	0	1	0	0	0	1	0	NA	NA	0	0	1	86	1	86
1	86	6	0	0	1	0	0	0	0	1	0	0	1	1	NA	NA	0	0	1	58	1	58
2	87	6	0	0	0	0	1	1	0	0	1	0	0	1	metoprolol	NA	0	0	1	40	1	40
1	86	8	0	0	0	0	1	0	1	0	0	0	0	0	NA	NA	0	0	1	56	1	56
2	86	5	0	0	1	0	0	0	0	1	0	0	0	1	NA	NA	0	1	1	46	1	46
2	93	9	0	0	0	0	0	1	1	0	1	0	1	1	carvedilol	NA	0	0	1	84	1	62
2	87	6	0	0	0	1	0	0	0	0	0	0	1	0	NA	NA	0	0	0	1835	0	1835
2	87	8	0	0	0	1	1	1	1	1	0	1	0	1	nebivolol	NA	0	0	0	1867	0	1867
1	86	8	0	0	1	0	0	0	0	0	0	0	0	0	NA	NA	0	0	1	599	1	599
1	86	15	0	0	0	0	1	0	1	0	0	1	0	0	NA	NA	0	0	1	746	1	746
1	86	8	0	0	0	0	1	1	1	0	0	0	0	0	carvedilol	NA	0	1	0	2052	1	1256
2	87	6	0	0	1	0	0	1	1	0	1	0	1	1	carvedilol	NA	0	1	1	1743	1	1743
2	86	8	0	0	1	0	0	0	1	0	0	0	0	0	NA	NA	0	0	1	132	1	132
2	86	11	0	0	1	0	0	1	0	0	0	0	0	0	nebivolol	NA	0	1	1	981	1	981
1	94	6	0	0	1	0	0	1	1	1	0	0	0	0	carvedilol	NA	0	0	1	469	1	416
1	86	11	0	0	1	0	1	0	1	0	0	0	0	0	NA	NA	0	0	1	56	1	56
2	86	6	1	0	1	0	0	0	1	0	0	0	0	0	NA	NA	0	0	0	1888	1	584
2	86	10	0	0	0	0	1	0	0	0	0	0	0	0	NA	NA	0	0	1	815	1	815
2	87	7	0	0	1	0	1	1	1	0	0	0	1	0	carvedilol	NA	0	0	1	334	1	334
1	87	7	0	0	0	0	1	0	1	0	0	0	0	0	NA	NA	0	0	1	588	1	365
1	87	7	0	0	0	1	1	0	1	0	1	1	1	0	NA	NA	0	0	0	1844	0	1844
2	86	11	0	0	1	0	0	0	0	0	0	0	0	0	NA	NA	0	0	1	1666	1	914
1	86	4	0	1	1	0	1	0	1	0	0	0	1	0	NA	doxazosin	0	0	0	1954	0	1954
1	86	7	0	0	1	0	1	1	1	1	0	0	0	1	bisoprolol	NA	0	0	1	301	1	301
2	86	8	0	0	0	0	0	1	1	0	0	1	1	0	carvedilol	NA	0	0	1	311	1	311
1	86	5	0	1	1	0	0	0	0	0	1	0	1	0	NA	doxazosin	0	0	0	2107	1	912
1	86	9	0	0	1	0	0	1	0	0	0	0	0	0	bisoprolol	NA	0	0	1	1	1	1
1	86	9	0	0	0	0	1	1	1	1	0	0	0	0	carvedilol	NA	0	0	1	1041	1	1041
2	86	6	0	0	1	0	0	1	1	0	1	1	0	0	carvedilol	NA	0	0	0	2041	1	187
2	86	9	0	0	1	0	0	1	0	0	0	0	0	0	metoprolol	NA	0	1	1	1594	1	1594
2	86	3	0	0	1	0	0	0	0	0	1	0	0	1	NA	NA	0	0	1	144	1	144
1	86	11	0	0	0	0	0	1	0	0	0	1	1	0	bisoprolol	NA	0	0	1	884	1	884
2	86	7	0	0	1	0	0	0	1	0	0	0	0	0	NA	NA	0	0	1	29	1	29
2	86	5	0	0	1	0	0	0	1	0	1	0	0	0	NA	NA	0	0	0	2025	0	2025
2	86	4	0	0	0	0	1	0	0	1	0	0	0	1	NA	NA	0	0	1	389	1	389
1	86	1	0	0	0	0	0	1	0	0	0	0	0	0	metoprolol	NA	0	0	1	399	1	396
2	86	7	0	0	1	0	0	1	1	0	1	0	0	0	carvedilol	NA	0	0	0	1922	1	1125
2	86	5	0	0	1	0	0	1	1	0	0	0	0	0	carvedilol	NA	0	0	0	2154	0	2154
1	86	6	0	0	1	0	0	0	0	0	0	0	1	0	NA	NA	0	0	0	1972	0	1972
2	86	9	0	0	1	0	0	0	0	0	0	0	1	1	NA	NA	0	0	1	2007	1	2007
2	86	6	0	0	1	1	0	1	1	1	0	0	1	0	carvedilol	NA	0	0	1	138	1	138
2	86	8	1	0	1	0	1	1	1	1	0	0	1	0	carvedilol	NA	0	0	1	454	1	454
2	86	12	0	0	0	0	1	1	1	0	0	0	1	0	carvedilol	NA	0	0	1	1400	1	50
2	93	15	0	0	1	0	0	0	1	0	0	0	0	0	NA	NA	0	0	1	1339	1	1339
2	86	5	0	0	1	0	1	1	0	0	0	0	0	0	nebivolol	NA	0	0	0	1893	0	1893
1	87	5	0	0	0	0	1	0	0	0	0	0	0	0	NA	NA	0	0	0	1811	0	1811
2	86	7	1	0	1	0	0	0	1	0	1	0	1	1	NA	NA	0	0	1	1457	1	40
2	86	6	0	0	0	0	1	1	1	0	0	0	0	0	carvedilol	NA	0	1	1	306	1	306
2	86	14	0	0	0	1	0	0	1	0	1	0	0	0	NA	NA	0	0	0	2028	1	1078
2	86	5	0	0	1	0	0	0	1	0	0	0	1	0	NA	NA	0	1	1	85	1	85
1	87	9	0	0	0	0	1	0	1	0	0	0	0	0	NA	NA	0	0	1	58	1	58
2	87	13	0	0	0	0	1	0	1	0	0	0	1	0	NA	NA	0	1	1	411	1	411
2	86	6	0	0	1	0	1	1	1	0	0	0	1	0	carvedilol	NA	0	0	1	996	1	987
1	86	7	0	0	1	0	0	0	1	0	0	1	0	1	NA	NA	0	0	1	1744	1	1744
2	86	6	0	0	1	0	0	1	0	0	0	0	0	0	carvedilol	NA	0	0	1	490	1	490
2	86	14	0	0	0	1	0	1	0	1	0	0	0	0	nebivolol	NA	0	0	0	2067	0	2067
1	86	6	0	0	1	0	0	0	0	0	0	1	0	1	NA	NA	0	0	1	223	1	223
1	86	7	0	0	1	0	1	1	1	1	0	0	0	0	bisoprolol	NA	0	1	1	411	1	411
1	86	8	0	0	1	0	0	0	0	0	0	0	0	0	NA	NA	0	0	1	1937	1	1937
1	86	2	0	0	1	0	1	1	1	0	0	0	1	1	carvedilol	NA	0	0	1	84	1	84
2	86	5	0	0	1	0	1	0	0	0	1	0	1	0	NA	NA	0	0	1	1003	1	1003
1	86	8	0	0	1	0	0	1	1	0	1	0	1	0	carvedilol	NA	0	1	1	1159	1	1159
2	86	19	0	0	0	0	1	0	1	1	0	0	0	0	NA	NA	0	0	1	1899	1	1894
2	93	8	0	0	1	0	0	0	1	0	1	0	0	1	NA	NA	0	1	1	113	1	113
2	87	6	0	0	1	0	0	0	0	0	0	0	0	0	NA	NA	0	0	1	803	1	803
2	87	16	1	0	0	0	0	1	0	0	0	0	0	0	carvedilol	NA	1	0	1	201	1	201
1	93	7	0	0	1	0	0	1	0	0	0	0	0	0	carvedilol	NA	0	0	1	734	1	734
1	86	22	0	0	1	0	1	0	1	0	0	0	0	0	NA	NA	0	0	1	1264	1	1264
2	93	12	0	0	1	0	0	0	0	0	0	0	0	0	NA	NA	0	0	1	151	1	53
2	87	5	0	0	1	0	1	0	1	0	0	0	1	0	NA	NA	0	0	0	1849	1	934
2	86	9	0	0	1	0	1	0	1	0	0	0	0	0	NA	NA	0	0	1	1847	1	1847
2	86	11	0	0	0	0	0	1	1	0	0	0	1	0	carvedilol	NA	0	0	1	1324	1	1324
2	86	11	0	0	0	0	1	1	0	1	0	0	0	0	carvedilol	NA	0	0	1	220	1	200
2	86	6	0	0	1	0	0	0	1	0	0	0	0	0	NA	NA	0	0	1	1210	1	1210
2	86	6	0	0	0	0	0	1	0	0	0	0	0	0	carvedilol	NA	0	1	0	1908	1	867
2	86	8	0	0	1	0	0	0	1	1	0	1	0	0	NA	NA	0	0	0	1978	0	1978
1	86	3	0	0	1	0	1	0	1	1	0	0	0	0	NA	NA	0	0	1	536	1	536
1	87	13	0	0	1	0	0	1	1	0	0	0	0	0	carvedilol	NA	0	0	1	311	1	196
2	86	10	0	0	1	0	0	1	0	0	0	0	0	1	carvedilol	NA	0	0	1	439	1	439
2	86	7	0	0	1	0	0	0	1	0	1	0	1	0	NA	NA	0	0	1	777	1	777
2	87	7	0	0	1	0	1	1	0	0	0	0	1	1	metoprolol	NA	0	0	1	1116	1	290
1	87	11	0	0	1	0	1	0	1	0	0	0	0	0	NA	NA	0	0	0	1821	0	1821
2	86	7	0	0	1	0	1	1	1	0	1	1	1	0	carvedilol	NA	0	1	0	2042	0	2042
2	86	13	0	0	1	0	1	0	1	0	0	0	1	0	NA	NA	0	0	0	1893	1	166
2	86	9	0	0	1	0	1	0	0	0	1	1	0	1	NA	NA	0	0	1	1378	1	1378
2	86	7	0	0	1	0	1	0	0	0	1	0	1	0	NA	NA	0	1	1	93	1	93
2	87	12	0	0	0	1	0	0	1	0	0	0	0	1	NA	NA	0	0	1	1490	1	1490
2	86	6	0	0	1	0	1	1	1	0	0	0	1	0	carvedilol	NA	0	0	1	457	1	410
2	86	9	0	0	1	0	0	1	0	0	0	0	1	0	carvedilol	NA	0	0	1	1732	1	1732
2	86	13	0	0	1	0	1	0	1	0	1	0	0	1	NA	NA	0	0	1	767	1	767
2	86	34	0	0	1	0	0	1	0	0	1	0	0	0	metoprolol	NA	0	0	1	5	1	5
2	86	6	0	0	0	1	0	0	0	0	0	1	1	0	NA	NA	0	0	0	2080	0	2080
1	94	6	0	1	1	0	1	0	1	0	0	0	0	0	NA	doxazosin	0	0	1	177	1	92
2	86	7	0	0	1	0	1	0	1	0	0	1	0	0	NA	NA	0	0	1	563	1	514
2	93	7	0	0	1	0	0	0	0	0	1	0	0	0	NA	NA	0	0	0	1997	0	1997
1	87	6	0	1	1	0	1	1	0	1	0	0	0	0	bisoprolol	doxazosin	0	0	0	1816	0	1816
1	86	6	0	0	0	0	1	0	0	0	0	0	1	0	NA	NA	0	0	0	1906	0	1906
1	86	3	0	0	0	0	0	1	1	0	0	0	0	0	carvedilol	NA	0	0	1	611	1	427
2	86	8	0	0	1	0	1	0	1	1	0	0	0	1	NA	NA	0	0	0	1996	0	1996
2	86	12	0	0	1	0	1	1	1	1	0	0	0	0	carvedilol	NA	0	1	1	1908	1	1908
2	86	9	0	0	1	0	1	1	1	1	0	0	0	0	carvedilol	NA	0	0	0	2077	0	2077
1	86	7	0	0	1	0	0	1	0	0	0	0	1	0	bisoprolol	NA	0	0	0	2002	0	2002
2	93	5	0	0	1	0	1	0	1	0	0	0	0	1	NA	NA	0	0	1	3	1	3
2	86	9	0	0	1	0	1	0	1	0	0	1	0	0	NA	NA	0	0	1	849	1	849
2	86	17	0	0	0	0	1	0	1	0	0	1	0	1	NA	NA	0	0	1	757	1	240
2	86	9	0	0	0	0	0	1	1	0	0	0	0	0	metoprolol	NA	0	0	1	1846	1	1846
2	86	3	0	0	0	0	1	0	1	1	0	0	1	0	NA	NA	0	0	0	1920	0	1920
2	86	4	0	0	1	0	1	0	0	0	0	0	0	1	NA	NA	0	0	0	1915	0	1915
2	93	12	0	0	1	0	0	0	0	0	0	0	0	0	NA	NA	0	0	1	433	1	98
1	86	8	0	0	1	0	0	0	0	0	0	0	0	0	NA	NA	0	0	0	2080	0	2080
2	86	13	1	0	1	0	1	0	1	1	1	0	0	1	NA	NA	0	0	1	44	1	44
1	86	16	0	0	0	0	1	1	1	0	0	0	0	0	carvedilol	NA	0	0	1	367	1	367
1	86	1	0	0	0	0	0	1	1	0	0	0	0	0	carvedilol	NA	0	0	1	766	1	696
1	86	5	0	0	1	0	1	0	1	0	0	0	0	0	NA	NA	0	0	1	966	1	533
2	93	2	0	0	0	0	0	1	0	0	0	0	0	0	carvedilol	NA	0	0	1	678	1	74
2	86	6	0	0	1	0	0	1	1	1	0	0	0	0	carvedilol	NA	0	1	1	325	1	325
2	86	12	0	0	1	0	0	1	0	0	0	0	1	0	carvedilol	NA	0	0	1	132	1	132
1	86	10	0	0	1	0	0	0	0	0	0	0	1	0	NA	NA	1	0	1	2030	1	862
2	86	3	0	0	0	0	0	1	0	0	0	0	1	0	carvedilol	NA	0	0	0	1927	1	515
2	86	8	0	0	1	0	1	0	1	1	0	0	0	0	NA	NA	0	0	1	35	1	35
2	87	6	0	0	0	0	1	1	1	0	0	0	0	0	nebivolol	NA	0	0	1	195	1	195
2	86	12	0	0	0	1	0	0	0	0	1	0	0	0	NA	NA	0	0	1	614	1	614
1	86	5	0	0	1	0	0	1	1	0	0	0	0	1	carvedilol	NA	0	1	0	1888	0	1888
2	86	8	0	0	1	0	1	0	1	0	0	1	0	0	NA	NA	0	0	1	1941	1	1941
1	86	9	0	0	1	0	0	0	1	0	0	0	0	0	NA	NA	1	0	1	197	1	41
1	87	9	0	0	1	0	1	0	1	0	0	0	0	0	NA	NA	0	1	1	791	1	595
2	86	6	0	0	0	0	0	1	1	0	0	0	1	1	nebivolol	NA	0	0	1	938	1	938
2	86	19	0	0	0	0	1	0	1	1	0	0	0	0	NA	NA	0	0	1	1261	1	1261
2	87	4	0	0	1	0	1	0	0	0	1	0	0	0	NA	NA	0	0	0	1821	0	1821
2	87	2	0	0	0	1	0	1	1	0	0	0	1	0	carvedilol	NA	0	0	0	1849	1	247
1	86	9	0	0	0	0	1	0	1	0	0	0	0	0	NA	NA	0	0	1	50	1	50
1	86	7	0	0	1	0	0	0	1	1	0	0	1	0	NA	NA	0	1	1	120	1	34
2	86	8	0	0	0	0	0	1	0	0	0	0	0	0	carvedilol	NA	0	0	1	1917	1	1806
2	86	9	1	1	1	0	0	0	1	0	1	0	1	0	NA	doxazosin	0	0	1	1078	1	1078
2	86	8	0	0	1	0	0	0	1	0	1	0	0	0	NA	NA	0	0	1	1398	1	1398
1	86	5	0	0	0	0	0	1	0	0	0	0	0	1	carvedilol	NA	0	0	0	1971	1	746
2	86	6	0	0	0	0	1	1	0	1	0	0	0	0	carvedilol	NA	0	0	1	1782	1	1782
1	86	4	0	0	1	0	0	1	1	1	1	0	0	0	carvedilol	NA	0	0	1	1870	1	1870
2	86	2	0	0	0	1	0	1	1	0	0	0	0	0	carvedilol	NA	0	0	0	1886	0	1886
1	87	7	0	0	0	0	1	1	1	0	0	1	0	0	other	NA	0	0	1	86	1	80
1	86	6	0	0	1	1	1	1	0	1	1	0	1	0	bisoprolol	NA	0	0	0	2144	1	1255
2	86	6	1	0	1	0	0	0	1	0	0	1	0	0	NA	NA	0	0	1	2007	1	2007
2	86	6	0	1	1	0	0	0	0	0	1	0	0	1	NA	doxazosin	0	0	1	117	1	117
1	86	6	0	0	1	0	0	1	0	0	0	0	1	0	other	NA	0	0	1	1465	1	1465
1	86	7	0	0	0	0	1	0	0	0	0	0	0	0	NA	NA	0	0	1	757	1	529
2	86	5	0	0	1	0	1	1	1	0	1	1	0	0	carvedilol	NA	0	0	0	2121	0	2121
1	86	2	0	0	1	0	0	0	0	0	0	0	1	0	NA	NA	0	0	1	1773	1	1773
1	93	9	0	0	1	0	1	0	0	1	0	0	0	0	NA	NA	0	0	1	35	1	35
1	86	4	1	0	1	0	0	0	0	0	1	0	0	1	NA	NA	0	1	1	1322	1	1322
2	86	5	0	0	0	0	0	1	1	0	0	0	0	0	nebivolol	NA	0	0	1	98	1	98
2	86	8	0	0	0	1	0	0	1	0	1	1	1	1	NA	NA	0	0	1	751	1	751
2	86	15	0	0	0	0	1	1	0	0	0	0	0	0	carvedilol	NA	0	1	1	561	1	81
2	86	6	0	0	1	0	1	0	1	0	0	0	0	0	NA	NA	0	1	1	910	1	910
2	86	4	0	0	0	0	0	1	0	0	0	0	0	0	carvedilol	NA	0	0	1	214	1	214
2	86	5	1	0	1	0	1	0	1	1	0	0	0	0	NA	NA	0	0	0	1853	0	1853
2	86	11	0	0	0	1	0	1	1	0	0	0	0	0	metoprolol	NA	0	0	1	40	1	40
2	86	7	0	0	1	0	0	1	0	1	0	0	0	0	carvedilol	NA	0	0	1	44	1	44
1	86	5	0	0	1	0	1	0	0	0	0	0	0	0	NA	NA	0	0	1	970	1	970
1	87	7	0	1	1	0	1	1	0	1	0	0	1	1	nebivolol	doxazosin	0	0	1	348	1	348
1	86	4	0	0	1	0	1	0	0	0	0	0	0	0	NA	NA	0	0	1	1625	1	1625
2	87	4	0	1	0	1	0	0	0	0	1	0	1	1	NA	doxazosin	0	0	1	1518	1	1492
2	86	4	0	0	0	0	1	0	0	0	0	0	0	0	NA	NA	0	0	0	1988	1	180
2	86	5	1	0	1	0	1	1	1	1	0	1	0	0	nebivolol	NA	0	0	1	12	1	12
1	86	20	0	0	0	0	0	1	1	0	0	0	0	1	carvedilol	NA	0	0	1	16	1	16
2	87	2	0	0	0	0	1	0	1	0	0	0	0	0	NA	NA	0	0	1	1234	1	1234
2	86	5	0	0	0	0	0	1	1	0	0	1	0	0	carvedilol	NA	0	0	0	1960	0	1960
2	86	1	0	0	1	0	0	0	0	0	0	0	0	0	NA	NA	0	0	1	23	1	23
2	86	10	0	0	1	0	0	0	1	0	0	0	0	1	NA	NA	0	0	1	717	1	717
2	86	10	0	0	1	0	0	0	1	1	0	0	1	1	NA	NA	0	0	1	64	1	64
2	86	7	0	0	1	0	0	0	1	0	1	0	0	0	NA	NA	0	0	1	1136	1	1136
2	86	5	0	0	0	0	1	1	1	0	0	0	1	0	carvedilol	NA	0	0	1	167	1	167
2	93	7	0	0	1	0	1	0	0	0	0	0	0	0	NA	NA	0	0	1	189	1	189
2	86	5	0	0	1	1	0	0	0	0	0	0	0	1	NA	NA	0	1	1	1265	1	1265
2	86	2	0	0	0	0	0	1	0	0	0	0	0	0	carvedilol	NA	0	0	0	2024	0	2024
1	86	5	0	0	1	0	0	0	0	1	0	0	0	0	NA	NA	0	0	1	311	1	295
1	86	5	0	0	1	0	1	0	1	0	0	0	1	0	NA	NA	0	0	1	122	1	122
2	86	11	0	0	1	0	0	1	1	0	0	0	1	0	nebivolol	NA	0	0	0	1922	0	1922
2	86	11	0	0	1	0	0	0	0	0	0	0	1	1	NA	NA	0	0	1	1501	1	1501
2	86	5	0	0	1	0	0	0	1	1	0	0	0	1	NA	NA	0	0	1	300	1	300
2	86	3	0	0	1	0	1	1	1	0	0	1	0	0	carvedilol	NA	0	1	1	280	1	280
2	86	8	0	0	0	0	1	0	0	1	0	0	0	0	NA	NA	0	1	1	916	1	881
2	86	11	0	0	0	0	1	1	1	0	0	0	0	0	carvedilol	NA	0	0	1	1	1	1
2	86	5	0	0	1	0	0	1	1	0	0	0	0	0	other	NA	0	0	0	2119	0	2119
2	86	9	0	0	1	0	0	0	0	0	0	0	0	0	NA	NA	0	0	1	1070	1	1070
2	86	4	0	0	1	0	0	0	1	0	0	0	1	0	NA	NA	0	0	1	908	1	264
2	93	9	0	0	1	0	1	1	1	0	1	0	0	0	carvedilol	NA	0	0	1	943	1	943
2	86	3	0	0	1	0	0	1	1	0	1	0	0	0	carvedilol	NA	0	1	1	997	1	997
1	86	8	0	0	0	0	0	1	0	0	0	0	0	0	nebivolol	NA	0	0	1	568	1	568
1	86	4	0	0	1	0	1	0	1	1	0	0	0	0	NA	NA	0	0	1	1660	1	349
2	86	10	0	0	1	0	1	1	0	0	0	0	0	0	bisoprolol	NA	0	0	0	2126	0	2126
2	87	11	0	0	0	1	1	0	1	0	0	0	0	0	NA	NA	0	0	0	1803	0	1803
2	86	11	0	0	1	0	0	1	0	0	0	0	0	0	metoprolol	NA	0	0	1	1964	1	629
1	86	14	0	0	0	1	0	1	1	0	0	1	1	1	carvedilol	NA	0	0	1	1539	1	222
2	86	37	0	0	0	0	1	0	1	1	0	0	0	0	NA	NA	0	0	1	860	1	860
1	87	3	0	0	1	0	1	0	0	0	0	1	1	0	NA	NA	0	0	0	1823	0	1823
2	93	7	0	0	0	0	1	0	0	0	0	0	0	0	NA	NA	0	0	1	606	1	606
1	86	3	0	0	1	0	0	0	0	0	1	0	0	1	NA	NA	0	0	1	710	1	708
1	86	5	0	0	0	0	1	1	0	0	0	0	0	0	other	NA	0	0	0	1860	0	1860
1	87	12	0	0	0	0	1	0	1	0	0	0	0	0	NA	NA	0	0	1	128	1	107
2	87	6	0	0	1	0	1	1	0	0	0	0	1	0	carvedilol	NA	0	0	0	1794	0	1794
2	86	7	0	1	1	0	0	0	1	0	1	0	0	0	NA	doxazosin	0	0	0	2047	1	1195
2	86	4	0	0	0	1	0	0	0	0	0	0	0	0	NA	NA	0	0	0	2027	0	2027
2	86	7	0	0	0	0	0	1	0	0	0	0	0	0	metoprolol	NA	0	0	0	1877	0	1877
2	86	7	0	0	1	0	0	0	0	0	0	0	0	0	NA	NA	0	0	1	611	1	611
1	86	8	0	0	1	0	1	0	0	0	0	0	0	0	NA	NA	0	1	1	1242	1	793
2	86	16	0	1	1	0	0	0	0	1	1	0	1	0	NA	doxazosin	0	0	1	674	1	653
2	86	2	0	0	1	0	0	0	0	0	0	0	0	0	NA	NA	0	0	0	1885	0	1885
1	86	24	0	0	1	0	0	0	0	1	0	0	0	0	NA	NA	0	0	0	1943	0	1943
2	86	14	0	0	0	0	0	1	0	1	0	0	1	0	metoprolol	NA	0	0	1	1416	1	1366
1	86	9	0	0	0	0	0	1	1	0	0	1	0	1	carvedilol	NA	0	0	1	786	1	72
2	86	8	1	0	1	0	1	0	1	0	1	0	0	0	NA	NA	0	0	1	933	1	933
2	93	7	0	0	1	0	1	1	0	1	1	0	0	0	metoprolol	NA	0	0	0	2049	1	126
1	86	5	0	0	1	0	0	0	0	0	0	0	1	0	NA	NA	0	0	1	1246	1	312
2	86	2	0	0	1	0	0	1	1	0	1	0	0	0	carvedilol	NA	0	0	0	2018	0	2018
2	86	9	0	0	0	0	0	1	1	1	0	1	0	0	nebivolol	NA	0	0	0	1865	0	1865
2	87	9	0	0	1	0	1	1	1	1	1	1	0	0	carvedilol	NA	0	0	1	1708	1	1708
1	86	11	0	0	0	0	1	0	1	1	0	0	1	1	NA	NA	0	0	1	1017	1	664
2	86	6	0	0	1	0	0	1	1	0	0	0	0	1	metoprolol	NA	0	1	1	154	1	152
1	86	9	0	0	0	0	0	1	1	0	0	0	0	0	carvedilol	NA	0	1	1	75	1	75
2	86	8	0	0	1	0	0	1	0	0	1	1	0	1	metoprolol	NA	0	0	1	1171	1	1164
2	86	13	0	0	0	0	1	0	0	0	0	0	0	0	NA	NA	0	0	0	2140	0	2140
2	86	3	0	0	1	0	0	0	0	0	0	0	1	0	NA	NA	0	0	1	817	1	817
2	86	12	0	0	1	0	0	1	1	0	0	0	0	1	nebivolol	NA	0	0	1	550	1	550
2	86	11	0	0	0	0	0	1	0	0	0	0	0	1	carvedilol	NA	1	1	1	17	1	17
2	86	3	0	0	0	0	0	1	0	0	0	0	0	0	bisoprolol	NA	0	0	1	1063	1	1004
2	86	24	1	0	1	0	1	0	1	0	0	0	0	0	NA	NA	0	0	1	128	1	128
2	86	4	0	0	1	0	1	0	1	0	1	1	0	0	NA	NA	0	0	1	349	1	349
2	86	18	0	0	0	0	0	1	1	0	0	0	0	1	metoprolol	NA	0	0	1	5	1	5
2	86	9	0	0	0	0	0	1	1	1	0	0	0	1	carvedilol	NA	0	0	1	410	1	410
2	86	7	0	0	1	0	0	0	0	0	1	0	0	1	NA	NA	0	0	1	1252	1	1252
2	86	9	0	0	0	1	0	1	0	0	0	0	0	0	carvedilol	NA	0	0	1	1877	1	1877
2	86	7	0	0	1	0	0	0	0	0	0	1	0	0	NA	NA	0	0	1	1376	1	1376
2	86	2	0	0	1	0	0	0	0	0	0	0	1	0	NA	NA	0	0	1	1687	1	1687
2	86	6	0	0	0	1	0	0	1	0	0	1	0	1	NA	NA	0	0	1	506	1	17
1	86	3	0	0	1	0	0	0	0	0	0	0	1	0	NA	NA	0	0	1	1603	1	1602
1	93	5	0	0	1	0	0	0	0	0	0	0	0	0	NA	NA	0	0	1	1520	1	1520
2	86	10	0	0	0	0	1	0	0	0	0	0	0	0	NA	NA	0	0	0	2068	0	2068
1	86	10	0	0	1	0	0	0	0	1	0	0	0	1	NA	NA	0	0	0	1978	1	139
2	86	8	0	0	0	0	1	0	1	1	1	0	0	0	NA	NA	0	0	1	110	1	110
2	86	5	0	0	1	0	1	0	0	1	0	0	0	1	NA	NA	0	0	1	1217	1	1215
2	86	2	0	0	1	0	0	0	1	0	0	0	0	0	NA	NA	0	0	1	406	1	393
2	87	4	0	0	1	0	0	1	1	0	1	0	0	0	carvedilol	NA	0	0	1	764	1	764
2	86	11	0	0	1	0	1	1	1	0	0	0	1	0	other	NA	0	1	0	2020	0	2020
2	86	6	0	0	1	0	1	1	1	0	1	0	0	0	carvedilol	NA	0	0	0	1969	0	1969
1	86	12	0	0	0	0	0	1	0	0	0	0	0	0	nebivolol	NA	0	0	1	1669	1	1669
2	86	5	0	0	0	0	0	1	0	0	0	0	0	0	carvedilol	NA	0	0	1	1566	1	269
1	86	3	0	0	0	0	1	0	1	0	0	0	1	0	NA	NA	0	0	1	685	1	685
1	86	4	0	0	1	0	0	1	1	0	0	0	0	0	nebivolol	NA	0	1	1	1243	1	1243
2	86	9	0	0	1	0	1	0	1	0	1	0	0	1	NA	NA	0	0	1	27	1	27
1	86	15	0	0	0	0	0	1	0	0	1	0	0	0	metoprolol	NA	1	1	1	198	1	198
1	86	3	0	0	1	0	0	1	0	0	1	0	0	0	carvedilol	NA	0	1	0	1944	0	1944
2	86	8	0	0	1	0	0	0	1	1	1	1	0	1	NA	NA	0	0	1	526	1	99
2	86	12	0	0	1	0	0	0	0	0	0	1	1	0	NA	NA	0	0	0	2049	0	2049
2	86	3	0	0	1	0	0	0	0	0	0	0	0	0	NA	NA	0	0	1	199	1	199
1	86	14	0	0	0	0	1	1	1	1	0	0	0	0	carvedilol	NA	0	0	1	1746	1	1746
2	86	13	0	0	1	0	0	1	1	0	1	0	0	0	nebivolol	NA	0	0	1	19	1	19
2	86	4	0	0	1	0	1	0	0	0	0	0	1	0	NA	NA	0	0	1	56	1	56
2	86	12	0	0	0	0	0	1	1	0	0	0	0	0	bisoprolol	NA	0	0	0	2104	0	2104
1	86	5	0	1	1	0	0	0	0	0	0	0	0	1	NA	doxazosin	0	0	0	2076	0	2076
2	86	18	0	0	0	0	1	1	0	0	0	0	0	0	other	NA	0	0	1	1521	1	1521
2	86	9	1	1	1	0	1	0	1	0	0	0	1	1	NA	doxazosin	0	1	1	227	1	227
1	86	3	1	0	1	0	1	0	1	0	0	0	0	0	NA	NA	0	0	1	273	1	273
1	86	7	1	0	1	0	0	1	1	0	0	0	0	0	carvedilol	NA	0	0	1	17	1	11
2	86	4	0	0	1	0	0	0	1	0	0	0	1	1	NA	NA	0	0	0	1937	0	1937
2	86	5	0	0	1	1	1	1	1	1	1	0	1	1	carvedilol	NA	0	0	0	2151	1	1204
2	87	7	0	0	0	1	0	0	1	0	0	0	0	0	NA	NA	0	0	0	1800	1	604
2	86	2	0	0	1	0	0	0	0	0	0	0	0	0	NA	NA	0	0	1	1220	1	619
1	86	6	0	0	0	0	0	1	0	0	0	0	1	0	carvedilol	NA	0	0	1	801	1	801
2	86	5	0	0	0	0	1	0	1	0	0	0	0	0	NA	NA	0	0	1	1382	1	872
1	87	8	0	1	1	0	0	0	0	0	0	0	0	0	NA	doxazosin	0	1	0	1814	0	1814
2	86	8	0	0	0	0	0	1	0	0	0	0	0	0	metoprolol	NA	0	0	1	444	1	428
2	86	11	0	0	1	0	0	0	1	0	0	0	0	0	NA	NA	0	0	1	532	1	532
2	86	8	0	0	1	0	0	0	0	1	0	0	0	0	NA	NA	0	0	0	2034	0	2034
2	86	6	0	0	0	0	1	0	0	0	0	0	1	0	NA	NA	0	0	1	1742	1	1742
1	86	7	0	0	1	0	0	0	1	0	0	0	1	0	NA	NA	0	1	1	1348	1	1348
2	86	10	0	0	0	1	1	1	1	0	0	0	0	0	carvedilol	NA	0	0	1	1253	1	826
1	86	10	0	0	1	0	0	0	1	0	1	0	0	0	NA	NA	0	0	0	2104	0	2104
2	86	11	0	0	0	0	0	1	1	0	1	0	1	0	carvedilol	NA	0	1	1	425	1	162
1	86	3	0	0	0	0	1	0	0	0	1	0	0	0	NA	NA	0	0	0	1977	0	1977
2	86	5	0	0	0	0	0	1	0	0	1	0	0	0	nebivolol	NA	0	0	0	2105	0	2105
2	86	5	0	0	1	0	0	0	0	0	0	0	0	0	NA	NA	0	0	1	1290	1	1290
2	86	10	0	0	0	1	0	0	1	0	0	0	0	0	NA	NA	0	0	1	1253	1	1251
2	86	9	0	0	0	1	0	1	1	0	1	0	1	0	nebivolol	NA	0	1	0	2019	0	2019
2	86	8	0	0	0	1	0	1	0	0	0	0	0	0	carvedilol	NA	0	0	0	2075	0	2075
1	93	7	0	0	1	0	0	0	0	0	0	1	1	0	NA	NA	0	0	1	1649	1	1354
2	86	6	0	0	1	0	1	1	0	0	1	0	1	1	carvedilol	NA	0	1	1	385	1	385
2	86	4	0	0	1	0	0	0	0	0	0	0	0	0	NA	NA	0	0	1	117	1	117
1	87	11	0	0	0	0	1	0	1	0	0	0	1	0	NA	NA	0	0	0	1810	0	1810
2	86	6	0	0	0	1	0	0	0	0	0	0	0	0	NA	NA	0	0	0	2096	0	2096
2	86	8	0	0	1	0	0	1	0	0	0	0	0	0	carvedilol	NA	0	0	1	1908	1	1908
2	86	4	0	0	1	0	0	1	1	0	0	0	0	0	metoprolol	NA	0	0	1	1767	1	1025
2	86	6	0	0	1	0	0	0	0	0	0	0	1	0	NA	NA	0	0	1	1914	1	1914
2	93	7	0	0	1	0	0	0	1	1	1	0	0	0	NA	NA	0	0	1	1763	1	1763
2	86	10	0	0	1	0	0	0	1	0	1	0	0	0	NA	NA	0	0	1	316	1	316
2	86	8	0	0	0	0	0	1	1	0	1	0	1	0	other	NA	0	0	1	829	1	472
2	86	8	0	0	0	0	1	0	0	0	0	0	0	0	NA	NA	0	0	0	1895	0	1895
2	86	15	0	0	0	0	1	1	1	0	1	0	0	0	metoprolol	NA	0	0	1	11	1	11
2	86	6	0	0	0	0	0	1	1	0	0	0	1	0	bisoprolol	NA	0	0	1	737	1	219
2	86	14	0	0	1	0	1	1	1	1	0	1	0	1	carvedilol	NA	0	0	1	705	1	22
2	86	7	0	0	0	1	1	1	1	0	1	0	1	0	metoprolol	NA	0	0	1	1523	1	1523
2	86	18	0	0	0	0	1	0	0	0	0	0	0	0	NA	NA	0	0	1	665	1	665
2	86	8	0	0	0	0	1	1	1	0	0	0	1	0	other	NA	0	0	0	1866	1	700
2	87	8	1	0	1	0	0	0	1	0	1	0	1	0	NA	NA	0	1	1	909	1	588
2	86	15	0	0	1	0	0	0	0	0	0	0	0	0	NA	NA	1	0	1	637	1	637
2	86	5	0	0	0	0	1	0	0	1	1	0	0	0	NA	NA	0	0	1	1728	1	1728
1	86	6	0	0	1	0	0	0	0	0	0	0	1	0	NA	NA	0	1	1	1469	1	1469
2	93	14	0	0	0	0	0	1	0	0	0	0	0	0	carvedilol	NA	0	0	1	1490	1	1490
2	86	10	0	0	1	0	0	0	0	0	0	0	0	0	NA	NA	0	0	1	58	1	36
2	86	5	0	0	1	0	1	0	1	0	0	0	1	0	NA	NA	0	0	1	1287	1	81
2	86	10	0	0	1	0	0	0	1	0	0	0	1	1	NA	NA	0	0	1	86	1	86
2	86	9	0	0	1	0	1	1	1	0	0	1	0	1	other	NA	0	0	0	1941	0	1941
1	86	7	0	1	1	0	1	1	0	0	0	0	0	0	bisoprolol	doxazosin	0	0	1	123	1	6
2	86	3	0	0	0	0	0	1	1	0	0	0	0	0	nebivolol	NA	0	0	0	1935	0	1935
2	86	3	0	0	0	0	1	0	1	0	0	0	0	0	NA	NA	0	0	1	799	1	799
2	86	4	0	0	0	0	1	1	1	0	0	0	0	0	carvedilol	NA	0	0	1	1911	1	1911
2	86	5	0	0	0	1	0	0	0	1	0	1	0	0	NA	NA	0	0	1	622	1	368
2	86	9	0	0	1	0	1	0	0	0	0	0	1	0	NA	NA	0	0	1	23	1	23
2	87	7	0	0	1	1	0	1	1	0	0	1	0	0	bisoprolol	NA	0	0	1	560	1	559
2	86	11	0	0	1	0	1	0	1	0	0	0	0	0	NA	NA	0	0	0	1926	0	1926
1	86	6	0	0	0	0	0	1	1	0	0	0	0	0	carvedilol	NA	0	0	1	900	1	738
2	86	6	0	0	0	0	1	0	0	0	0	0	1	0	NA	NA	0	0	1	151	1	151
2	86	12	0	0	1	0	1	1	1	0	0	0	1	0	carvedilol	NA	0	0	0	2055	0	2055
2	86	4	0	0	0	0	1	0	0	0	0	0	0	0	NA	NA	0	0	1	386	1	386
2	86	5	0	0	0	0	1	0	1	0	0	0	1	0	NA	NA	0	0	1	929	1	866
2	86	8	0	0	0	0	1	1	1	0	1	0	1	0	other	NA	0	0	1	714	1	678
2	86	8	0	0	0	0	1	1	0	0	0	0	0	1	carvedilol	NA	0	0	1	817	1	543
2	86	3	0	0	0	0	0	1	0	0	0	0	0	0	carvedilol	NA	0	0	1	510	1	510
2	86	17	0	0	0	0	1	0	0	0	0	0	0	0	NA	NA	0	0	1	312	1	312
2	86	9	0	0	1	0	1	1	1	1	0	1	0	0	carvedilol	NA	0	0	1	948	1	948
2	86	7	0	0	1	0	0	1	0	0	0	0	0	0	other	NA	0	1	0	2132	0	2132
2	86	4	0	0	1	0	1	1	0	0	0	0	1	0	nebivolol	NA	0	0	1	235	1	235
2	86	2	0	0	0	0	1	0	1	0	0	0	1	0	NA	NA	0	0	1	1215	1	1215
2	86	6	0	0	1	0	0	0	0	0	0	0	0	0	NA	NA	1	0	1	1373	1	1373
1	86	17	0	0	1	0	1	0	0	0	1	0	0	0	NA	NA	1	0	1	707	1	707
2	86	14	0	0	1	0	0	0	0	0	0	0	0	0	NA	NA	0	0	0	1832	0	1832
2	86	5	0	0	0	1	1	1	1	0	0	0	1	1	carvedilol	NA	0	0	1	265	1	265
2	86	5	0	0	0	0	1	0	1	0	0	0	0	0	NA	NA	0	0	1	351	1	351
1	86	17	0	0	1	0	1	0	1	0	0	0	0	0	NA	NA	0	0	1	260	1	243
2	86	9	0	0	1	0	0	1	0	0	0	0	0	1	carvedilol	NA	0	0	1	1568	1	1568
2	86	3	0	0	1	0	0	0	1	0	1	0	0	0	NA	NA	0	0	0	1892	0	1892
2	86	5	0	0	0	0	0	1	1	0	1	0	1	1	nebivolol	NA	0	0	1	618	1	618
2	86	7	0	0	1	0	1	0	1	0	0	0	0	0	NA	NA	0	0	1	321	1	321
1	86	4	0	0	1	1	0	0	0	0	1	0	0	0	NA	NA	0	0	1	1645	1	1645
1	87	8	1	0	1	0	0	0	1	0	0	0	1	1	NA	NA	0	0	0	1791	0	1791
2	86	4	0	0	1	0	1	0	0	0	0	1	0	0	NA	NA	0	0	1	1028	1	1028
2	86	5	0	0	0	0	0	1	1	0	1	0	0	0	nebivolol	NA	0	0	1	43	1	43
1	86	7	0	0	1	0	1	1	1	1	0	0	0	0	carvedilol	NA	0	0	1	1498	1	1498
2	86	4	0	0	1	1	0	1	1	1	1	1	0	1	carvedilol	NA	0	0	1	302	1	302
2	86	7	0	0	1	0	0	0	0	0	0	0	0	0	NA	NA	0	0	1	128	1	128
2	86	3	0	0	1	0	0	0	1	0	0	0	0	0	NA	NA	0	0	1	116	1	116
1	93	10	0	0	0	0	1	0	0	0	0	0	0	0	NA	NA	0	0	1	318	1	318
2	86	7	0	0	0	0	1	1	0	0	0	1	0	0	carvedilol	NA	0	0	1	868	1	851
2	86	8	0	0	1	0	1	1	1	1	0	1	1	0	metoprolol	NA	0	0	0	2090	0	2090
2	86	5	0	0	0	0	0	1	1	1	0	0	0	1	carvedilol	NA	0	0	1	508	1	508
1	86	9	0	0	1	0	1	1	1	1	0	0	0	0	nebivolol	NA	0	0	1	1162	1	1162
2	86	6	0	0	1	0	0	1	1	0	0	0	1	0	carvedilol	NA	0	1	0	2142	0	2142
1	86	2	0	1	1	0	1	1	1	0	0	1	1	1	metoprolol	doxazosin	0	1	1	1514	1	518
1	86	7	0	0	1	0	0	0	0	0	0	0	1	0	NA	NA	0	0	1	1138	1	1138
2	86	5	0	0	0	0	1	0	1	1	0	0	1	0	NA	NA	0	0	1	870	1	870
2	86	7	0	0	0	0	1	0	0	0	0	1	0	0	NA	NA	0	0	1	21	1	21
2	86	5	0	0	1	0	1	1	0	0	0	0	1	0	carvedilol	NA	0	0	0	1829	0	1829
2	86	3	0	0	1	0	0	0	1	0	1	0	0	0	NA	NA	0	0	0	1906	0	1906
2	86	8	0	0	1	0	0	1	0	0	0	0	0	0	carvedilol	NA	0	0	1	474	1	474
1	86	9	0	0	1	0	0	0	1	0	0	0	0	0	NA	NA	0	0	1	122	1	122
2	86	12	0	0	1	0	1	0	1	0	0	0	0	0	NA	NA	1	0	0	2053	0	2053
2	86	3	0	0	0	0	1	1	0	1	0	1	0	0	carvedilol	NA	0	0	1	440	1	440
2	86	8	0	0	1	0	1	0	1	0	1	0	1	0	NA	NA	0	0	1	735	1	735
1	86	5	0	0	1	0	0	1	1	0	0	0	0	0	carvedilol	NA	0	0	0	2137	0	2137
2	86	3	0	0	1	0	0	0	0	0	0	0	0	0	NA	NA	0	0	1	1693	1	1693
2	86	4	0	0	1	0	0	1	1	1	0	0	0	0	carvedilol	NA	0	0	1	201	1	201
1	93	10	1	0	0	0	0	1	0	0	0	0	1	1	carvedilol	NA	0	0	1	33	1	33
2	86	6	0	0	1	0	0	1	0	0	0	0	1	1	carvedilol	NA	1	0	1	211	1	207
2	86	4	0	0	1	0	0	0	0	0	0	1	0	0	NA	NA	0	0	1	1402	1	188
1	86	6	0	0	1	0	0	0	0	1	0	0	0	0	NA	NA	0	0	0	1894	0	1894
1	87	2	0	0	1	0	0	0	1	0	0	1	0	0	NA	NA	0	0	0	1803	0	1803
1	87	10	0	0	0	0	1	0	1	0	0	0	0	0	NA	NA	0	0	1	1178	1	1178
2	93	7	0	0	0	1	0	1	1	0	0	1	0	1	metoprolol	NA	0	0	1	775	1	775
2	86	6	0	0	1	0	0	0	0	0	1	0	0	0	NA	NA	0	0	0	2143	0	2143
2	86	4	0	0	0	1	0	0	1	1	0	0	0	0	NA	NA	0	0	1	351	1	351
1	86	5	0	0	1	0	0	0	1	0	0	0	0	0	NA	NA	0	1	1	1260	1	1260
2	86	9	0	0	1	0	0	1	1	1	0	0	0	1	carvedilol	NA	0	0	1	430	1	337
1	86	6	0	0	1	0	0	1	1	0	0	0	1	0	nebivolol	NA	0	0	1	241	1	241
1	86	3	0	0	1	0	0	0	0	0	0	0	1	0	NA	NA	0	0	0	2102	1	487
1	86	4	0	0	0	0	1	1	0	0	0	0	0	0	carvedilol	NA	0	0	1	527	1	527
2	93	21	0	0	0	0	1	0	1	0	0	0	0	1	NA	NA	0	0	1	19	1	19
2	86	2	0	0	1	0	1	0	1	0	0	0	1	0	NA	NA	0	0	0	1909	0	1909
2	86	8	0	0	0	0	0	1	1	1	0	0	0	1	carvedilol	NA	0	0	1	1488	1	1488
2	86	7	0	0	1	0	1	0	1	0	0	0	0	0	NA	NA	0	0	1	71	1	71
2	86	9	0	0	1	0	0	0	1	0	1	0	0	0	NA	NA	0	0	1	890	1	890
2	86	11	0	0	0	1	0	0	1	0	0	0	0	0	NA	NA	0	0	1	1675	1	565
2	86	10	1	0	1	0	0	0	0	0	0	0	0	0	NA	NA	0	0	1	1384	1	849
2	93	11	0	0	1	0	1	0	1	0	0	0	0	0	NA	NA	0	0	1	526	1	526
1	86	4	0	0	1	0	0	0	0	0	0	0	0	0	NA	NA	0	1	0	2031	0	2031
2	86	10	0	0	1	0	0	1	0	0	0	0	0	0	carvedilol	NA	0	0	1	19	1	19
2	86	10	1	0	1	0	0	0	1	0	1	0	0	0	NA	NA	0	0	1	1276	1	1276
2	93	8	0	0	1	0	0	1	1	0	0	0	0	0	carvedilol	NA	0	0	1	531	1	531
2	86	13	0	0	0	0	1	1	1	1	0	1	0	1	carvedilol	NA	0	1	1	1502	1	990
2	86	13	0	0	1	0	0	0	1	0	0	0	0	0	NA	NA	0	1	1	1171	1	1171
1	86	2	0	1	0	0	1	0	1	0	0	0	0	0	NA	terazosin	0	0	1	18	1	18
2	86	4	0	0	1	0	0	0	1	0	1	0	1	1	NA	NA	0	0	1	1260	1	1040
2	86	11	0	0	0	0	0	1	1	0	0	0	0	0	carvedilol	NA	0	0	0	2014	0	2014
2	86	4	0	0	1	1	1	1	1	0	1	0	0	0	nebivolol	NA	0	1	1	591	1	591
2	86	6	0	0	0	0	1	1	1	0	0	0	0	0	bisoprolol	NA	0	0	1	53	1	53
2	86	11	0	0	1	0	1	1	1	1	0	0	0	0	carvedilol	NA	0	0	1	17	1	17
2	86	10	0	0	1	0	1	1	1	0	0	0	1	1	carvedilol	NA	0	0	1	181	1	181
2	86	5	0	0	1	0	0	0	0	0	0	0	1	0	NA	NA	0	0	1	1064	1	874
2	86	11	0	0	0	0	1	0	1	1	0	0	1	0	NA	NA	0	0	1	117	1	117
2	86	8	0	0	1	0	0	1	0	0	0	0	0	0	carvedilol	NA	0	0	1	1337	1	1337
1	86	5	0	0	1	0	0	0	0	0	1	0	0	0	NA	NA	0	0	1	944	1	672
2	86	11	0	0	1	0	1	0	1	1	0	0	0	0	NA	NA	0	1	1	337	1	337
2	86	8	0	0	1	0	0	0	0	0	1	0	0	0	NA	NA	0	0	0	2059	0	2059
1	86	6	0	0	1	0	1	1	1	0	1	0	0	0	carvedilol	NA	0	0	1	715	1	715
1	86	7	0	0	1	1	0	0	1	0	0	0	1	1	NA	NA	0	0	1	1140	1	1140
1	86	5	0	0	0	0	1	0	0	0	0	0	0	0	NA	NA	0	0	1	2082	1	2082
2	86	11	0	0	0	1	0	0	0	0	0	0	0	0	NA	NA	0	0	1	48	1	48
2	86	3	0	0	1	0	0	0	1	0	0	0	1	1	NA	NA	0	0	0	1983	0	1983
1	86	6	0	0	0	0	1	0	1	0	0	0	0	0	NA	NA	0	0	1	442	1	442
2	86	5	0	0	1	0	1	1	1	0	0	0	0	0	carvedilol	NA	0	0	1	64	1	64
1	86	7	0	1	1	0	1	1	0	0	0	0	1	1	metoprolol	doxazosin	0	0	0	2150	0	2150
2	93	9	1	0	0	0	0	1	1	0	0	0	0	0	carvedilol	NA	1	0	0	1990	0	1990
1	86	7	0	0	1	0	1	0	1	0	0	0	0	0	NA	NA	0	0	1	1312	1	1295
2	86	7	0	0	1	0	0	0	0	1	0	0	1	0	NA	NA	0	0	0	2143	0	2143
2	93	5	0	0	0	0	0	1	0	0	0	0	0	0	carvedilol	NA	0	0	1	39	1	39
2	86	9	0	0	1	0	0	1	1	0	0	0	0	1	carvedilol	NA	0	0	1	162	1	162
2	86	4	0	0	0	0	0	1	0	0	0	0	0	0	carvedilol	NA	0	0	1	1645	1	1016
2	86	7	0	0	1	0	0	1	1	0	0	0	0	1	metoprolol	NA	0	0	0	2039	0	2039
2	86	6	0	0	1	0	0	0	0	0	0	0	0	1	NA	NA	0	0	1	756	1	756
2	86	6	0	0	1	0	0	1	1	0	1	1	0	1	carvedilol	NA	0	0	1	72	1	72
1	86	3	0	0	0	0	0	1	1	0	0	1	1	0	carvedilol	NA	0	0	0	1975	0	1975
2	86	8	0	0	0	0	0	1	0	0	1	0	0	0	metoprolol	NA	0	0	1	773	1	773
2	86	10	0	0	1	0	1	0	1	0	0	0	0	0	NA	NA	0	0	0	1804	0	1804
2	86	4	0	0	1	1	1	1	0	0	0	0	1	1	carvedilol	NA	0	0	1	638	1	638
2	86	13	0	0	0	0	1	1	1	0	0	0	0	0	metoprolol	NA	0	0	1	1031	1	1031
2	93	6	0	0	1	0	0	0	0	1	0	0	0	0	NA	NA	0	0	1	28	1	28
2	86	7	0	0	1	0	1	0	1	0	1	0	1	0	NA	NA	1	0	1	1963	1	1963
2	86	14	0	0	1	0	1	0	1	1	0	0	1	0	NA	NA	0	0	0	1998	0	1998
1	86	6	0	0	1	0	1	1	1	1	0	0	0	0	carvedilol	NA	0	0	1	584	1	561
1	86	3	0	0	1	0	0	0	0	1	1	0	0	0	NA	NA	0	0	0	2080	1	637
2	86	8	0	0	0	0	1	1	1	1	0	0	0	0	metoprolol	NA	0	0	1	236	1	236
2	86	9	0	0	1	0	0	0	1	0	0	0	1	0	NA	NA	0	0	1	232	1	232
1	86	6	0	0	1	0	0	0	0	0	1	0	0	0	NA	NA	0	0	1	2019	1	363
1	86	13	0	0	1	0	1	0	0	0	0	1	1	0	NA	NA	0	0	1	980	1	967
2	86	8	0	0	0	0	1	0	1	0	0	0	0	0	NA	NA	0	0	1	1	1	1
1	86	6	0	0	0	1	0	0	1	0	1	0	0	0	NA	NA	0	0	0	1891	0	1891
1	93	12	0	0	1	0	1	1	1	0	0	0	0	0	carvedilol	NA	0	0	1	34	1	34
2	86	5	0	0	0	0	1	0	0	1	0	1	0	0	NA	NA	0	0	0	1992	0	1992
2	93	9	0	0	1	1	0	0	1	0	0	0	0	1	NA	NA	1	0	1	604	1	604
2	86	7	0	0	1	0	0	0	0	0	0	1	1	0	NA	NA	0	0	1	547	1	547
2	86	6	0	1	1	0	0	0	1	0	1	0	1	0	NA	doxazosin	0	0	0	2049	0	2049
2	93	2	0	0	0	0	0	1	0	0	0	0	1	0	metoprolol	NA	0	0	0	2005	0	2005
1	86	4	0	1	1	0	1	1	0	0	1	0	1	0	carvedilol	doxazosin	0	0	1	905	1	905
2	86	4	0	0	1	0	1	1	1	0	0	0	0	0	carvedilol	NA	0	0	1	675	1	675
1	86	4	0	0	0	0	0	1	0	0	0	0	0	0	bisoprolol	NA	1	0	0	2140	0	2140
2	86	5	0	0	1	0	1	1	1	0	0	0	0	0	metoprolol	NA	0	1	0	1902	1	586
1	93	16	0	0	1	0	0	0	1	1	1	0	0	0	NA	NA	0	0	1	539	1	449
2	86	5	0	0	0	0	1	1	0	1	0	1	1	0	metoprolol	NA	0	1	1	444	1	444
1	86	6	1	0	1	0	1	0	1	0	0	1	0	0	NA	NA	0	0	1	1635	1	1635
2	86	7	0	0	0	0	0	1	0	0	0	0	0	0	carvedilol	NA	0	0	1	463	1	463
2	86	4	0	0	1	0	1	0	1	1	0	0	1	0	NA	NA	0	0	0	1873	0	1873
2	93	5	0	0	0	1	0	0	1	0	1	0	0	1	NA	NA	0	0	1	61	1	61
2	86	2	0	0	1	0	0	1	0	0	0	0	1	0	carvedilol	NA	0	0	1	1739	1	891
1	86	14	0	0	0	0	0	1	0	0	0	0	0	0	carvedilol	NA	0	0	0	1902	0	1902
2	86	4	0	0	1	0	0	1	0	0	0	0	1	1	carvedilol	NA	0	0	1	745	1	745
1	86	13	1	0	1	0	0	1	0	1	0	1	1	1	carvedilol	NA	0	1	1	9	1	9
2	86	7	0	0	1	0	1	0	1	0	0	0	0	1	NA	NA	0	0	1	304	1	304
2	93	11	0	0	1	0	1	0	1	0	0	0	1	0	NA	NA	0	0	1	24	1	24
2	86	4	0	0	1	0	1	0	1	0	1	0	0	0	NA	NA	0	1	0	1878	0	1878
2	86	10	0	0	0	1	0	0	1	0	1	0	0	1	NA	NA	0	1	0	1912	1	608
2	86	13	0	0	1	0	1	0	1	1	0	1	0	0	NA	NA	0	0	1	1222	1	1222
2	86	5	0	0	0	0	0	1	1	0	0	0	0	0	carvedilol	NA	0	0	1	45	1	45
2	93	9	0	0	0	0	0	1	1	1	0	0	0	0	other	NA	0	1	1	199	1	194
2	86	8	0	0	1	0	1	1	0	0	1	0	1	1	carvedilol	NA	0	1	1	500	1	500
2	86	5	0	0	1	0	1	0	1	0	0	0	0	0	NA	NA	0	1	1	271	1	271
2	86	3	0	0	1	0	0	0	1	0	0	0	0	1	NA	NA	0	1	1	1055	1	1055
1	86	4	0	0	1	0	0	0	0	0	0	1	0	0	NA	NA	0	0	0	1828	0	1828
2	86	3	0	0	0	1	1	1	1	0	1	0	0	0	carvedilol	NA	0	1	1	1401	1	1004
2	86	19	1	0	0	1	1	1	1	0	0	0	1	0	carvedilol	NA	0	1	0	1859	1	876
2	86	7	0	0	0	0	0	1	0	0	0	0	0	0	carvedilol	NA	0	0	1	845	1	261
2	86	7	0	0	0	1	1	0	1	1	1	0	0	0	NA	NA	0	0	1	1003	1	684
2	86	6	0	0	1	0	1	0	1	0	0	1	1	0	NA	NA	0	0	0	2045	0	2045
2	86	11	0	0	1	0	0	0	0	0	0	0	0	0	NA	NA	0	0	1	324	1	324
1	86	4	0	0	0	0	0	1	0	0	0	0	0	1	bisoprolol	NA	0	0	1	137	1	137
2	86	7	1	0	0	0	0	1	1	1	0	1	0	1	metoprolol	NA	0	1	1	383	1	383
2	86	8	0	0	0	0	1	1	0	1	0	0	0	0	carvedilol	NA	0	1	1	190	1	190
2	86	8	0	0	1	0	0	1	0	0	0	0	0	0	carvedilol	NA	0	0	0	2061	0	2061
2	86	9	0	0	1	0	0	1	1	0	0	0	1	0	metoprolol	NA	1	0	0	2103	1	272
2	86	3	0	0	0	0	1	1	1	0	0	0	0	0	carvedilol	NA	0	1	1	1601	1	1601
2	86	6	0	0	0	0	1	0	1	0	0	0	0	0	NA	NA	0	0	1	157	1	144
2	86	5	0	0	1	0	1	0	1	0	0	0	1	0	NA	NA	0	0	0	1969	0	1969
1	93	5	1	1	1	0	1	1	1	0	0	0	0	1	carvedilol	doxazosin	0	0	1	390	1	390
2	86	7	0	0	1	0	0	0	0	0	0	0	1	1	NA	NA	0	0	1	700	1	700
1	93	15	0	0	0	0	0	1	0	0	0	0	0	0	carvedilol	NA	0	0	1	306	1	306
2	86	6	0	0	0	0	1	1	1	0	1	0	0	0	carvedilol	NA	0	0	1	2071	1	723
2	86	7	0	0	1	0	1	1	0	0	0	0	0	0	carvedilol	NA	0	1	1	659	1	659
1	86	9	0	1	0	0	1	1	1	0	0	0	0	0	carvedilol	doxazosin	0	0	1	301	1	301
2	86	8	0	0	1	0	1	0	1	0	0	0	1	1	NA	NA	1	0	1	878	1	874
2	86	7	0	0	0	0	1	0	0	1	0	0	0	0	NA	NA	0	0	0	1865	1	129
1	86	6	0	0	0	0	1	1	1	1	0	0	1	0	carvedilol	NA	0	0	1	1350	1	1350
2	86	15	0	0	0	0	1	0	0	1	0	0	0	0	NA	NA	0	0	1	143	1	143
1	86	15	1	0	0	1	1	1	0	0	0	0	0	0	carvedilol	NA	0	1	1	1092	1	1026
1	93	7	0	0	1	0	0	1	0	0	0	0	1	1	carvedilol	NA	0	0	1	447	1	447
2	86	5	0	0	1	0	0	1	1	0	0	0	0	0	other	NA	0	0	1	124	1	124
2	86	5	0	0	1	0	0	1	0	0	0	0	1	0	nebivolol	NA	0	0	0	1874	0	1874
1	86	7	0	0	0	0	0	1	0	0	0	0	1	0	carvedilol	NA	0	0	0	2080	1	1289
2	86	4	0	0	1	0	1	0	0	0	0	0	1	1	NA	NA	0	1	0	1849	0	1849
2	85	5	0	0	0	0	1	1	1	0	0	1	1	1	carvedilol	NA	0	0	1	1063	1	1063
2	86	5	0	0	1	0	0	0	1	0	0	1	1	0	NA	NA	1	0	1	118	1	118
1	86	7	0	0	1	0	0	0	0	0	0	0	1	0	NA	NA	0	0	0	1905	0	1905
1	86	7	0	0	1	0	0	0	0	0	1	0	1	0	NA	NA	0	1	0	1884	0	1884
1	86	6	1	0	1	0	1	1	0	0	0	0	0	0	carvedilol	NA	0	0	0	1899	0	1899
2	86	23	0	0	1	0	0	0	0	0	0	1	0	0	NA	NA	0	0	0	1935	0	1935
2	86	9	0	0	1	0	0	0	1	0	1	0	1	0	NA	NA	0	0	1	1152	1	1152
2	86	5	0	0	1	1	1	0	0	0	1	0	0	0	NA	NA	0	0	1	1405	1	891
2	86	8	0	0	0	0	0	1	1	0	0	0	0	0	carvedilol	NA	0	0	1	1627	1	1627
1	86	11	0	0	1	0	0	1	1	0	1	0	0	1	metoprolol	NA	0	0	1	596	1	596
2	85	7	0	0	0	0	1	1	1	0	0	0	0	1	carvedilol	NA	0	0	1	1450	1	1450
2	86	5	0	0	1	0	1	0	0	0	0	0	0	0	NA	NA	0	0	0	2042	1	1066
2	86	9	0	0	0	0	0	1	1	0	1	0	0	0	nebivolol	NA	0	0	1	3	1	3
1	86	4	0	1	0	0	0	1	0	0	0	0	1	0	carvedilol	doxazosin	0	0	0	2031	0	2031
2	86	7	0	0	0	1	1	1	1	0	1	0	1	0	nebivolol	NA	0	0	1	1498	1	871
1	93	11	1	0	1	0	0	1	1	0	1	0	1	0	carvedilol	NA	0	0	1	206	1	162
1	86	4	0	0	1	0	1	1	1	0	1	0	0	0	metoprolol	NA	0	1	1	230	1	230
2	93	4	0	0	0	0	0	1	1	0	0	0	1	0	bisoprolol	NA	0	1	1	372	1	372
2	86	3	0	0	1	0	1	0	1	0	0	1	0	1	NA	NA	0	0	0	2066	0	2066
1	86	10	0	0	0	0	1	0	0	0	0	0	0	0	NA	NA	0	0	1	22	1	22
1	86	16	0	0	0	1	0	0	1	0	0	0	1	0	NA	NA	1	0	1	756	1	756
2	86	6	0	0	0	0	1	0	1	0	0	0	0	0	NA	NA	0	0	1	1476	1	1476
2	86	4	0	0	0	1	0	0	0	0	0	0	1	0	NA	NA	0	0	1	559	1	528
2	86	3	0	0	1	0	0	0	0	0	0	1	0	0	NA	NA	0	0	0	2032	1	561
2	86	6	0	0	1	0	0	0	0	0	1	0	1	0	NA	NA	0	0	0	1972	0	1972
2	86	3	0	0	1	0	1	0	1	0	0	0	0	0	NA	NA	0	0	0	2039	1	813
1	86	2	0	0	1	0	1	1	1	1	0	0	1	1	carvedilol	NA	0	1	1	258	1	258
1	86	13	0	0	1	0	1	1	1	1	0	0	0	0	nebivolol	NA	0	0	1	1287	1	1287
2	86	9	1	0	0	0	0	1	1	0	0	0	1	0	carvedilol	NA	0	0	1	99	1	99
2	86	8	0	0	1	0	0	1	0	1	1	0	0	1	carvedilol	NA	0	0	1	170	1	146
1	86	6	0	0	0	0	1	0	0	1	0	1	0	0	NA	NA	0	0	1	886	1	886
2	86	23	0	0	0	0	0	1	0	0	0	0	0	0	carvedilol	NA	0	0	1	586	1	521
2	86	4	0	0	0	1	0	0	0	0	0	0	0	0	NA	NA	0	0	0	2117	0	2117
1	86	7	0	1	1	0	1	0	1	0	0	0	1	1	NA	doxazosin	0	0	1	1251	1	1239
2	86	5	0	0	1	0	0	1	0	0	0	0	1	0	carvedilol	NA	0	0	1	1135	1	628
2	86	2	0	0	1	0	1	0	1	1	0	1	0	0	NA	NA	0	1	1	1394	1	1394
1	86	10	0	0	0	0	1	0	1	0	1	0	0	0	NA	NA	0	0	1	886	1	886
2	86	11	0	0	0	0	1	1	0	0	0	0	0	0	carvedilol	NA	0	0	1	2	1	2
2	86	7	0	0	0	1	0	0	0	0	0	0	0	1	NA	NA	0	0	1	303	1	303
2	86	3	0	0	1	0	0	0	1	0	0	0	1	0	NA	NA	0	0	1	1987	1	1987
2	86	5	0	0	0	1	0	1	0	0	0	0	0	0	metoprolol	NA	0	0	0	2115	0	2115
2	93	4	0	0	1	0	1	0	0	0	0	0	1	0	NA	NA	0	0	1	635	1	635
1	93	11	1	0	0	0	0	1	0	0	1	0	1	0	carvedilol	NA	0	0	1	35	1	19
2	86	16	0	0	0	0	0	1	1	0	0	0	0	1	carvedilol	NA	0	1	0	1784	1	890
2	86	14	0	0	1	0	0	0	0	0	0	0	0	0	NA	NA	0	0	0	1915	0	1915
2	86	5	0	0	0	1	0	0	1	0	0	1	1	1	NA	NA	0	0	1	1843	1	1843
2	86	5	1	0	1	0	0	0	1	1	0	0	1	0	NA	NA	0	0	1	132	1	132
2	86	8	0	0	0	1	0	0	1	0	1	0	0	0	NA	NA	0	0	1	579	1	309
2	86	6	0	0	1	0	1	0	0	0	0	0	1	0	NA	NA	0	0	0	2024	0	2024
1	86	3	0	0	1	0	0	0	0	0	0	0	0	0	NA	NA	0	0	1	159	1	159
2	86	12	0	0	1	0	1	0	1	0	0	0	1	0	NA	NA	0	0	1	863	1	863
2	86	2	0	0	1	0	0	0	1	0	0	0	0	0	NA	NA	0	0	1	696	1	696
1	85	13	0	0	0	1	0	1	0	0	0	0	0	0	nebivolol	NA	0	0	1	65	1	65
1	86	16	0	0	1	0	1	1	1	0	0	0	1	0	carvedilol	NA	0	0	1	78	1	78
2	86	17	0	0	1	0	1	1	1	0	1	0	0	0	carvedilol	NA	1	1	1	11	1	8
2	93	10	0	0	1	0	0	1	1	0	0	0	0	0	carvedilol	NA	0	0	1	18	1	18
1	86	6	0	0	1	0	0	0	0	0	0	0	0	0	NA	NA	0	0	1	327	1	327
2	86	17	1	0	1	0	0	0	1	0	0	0	0	1	NA	NA	0	0	1	1705	1	1705
2	86	7	0	0	0	0	1	0	0	1	0	0	0	0	NA	NA	0	0	1	690	1	690
2	86	5	0	0	1	0	1	0	1	0	0	0	1	1	NA	NA	0	0	0	2012	0	2012
1	86	7	0	0	1	0	0	0	1	0	0	0	0	0	NA	NA	0	0	0	1985	0	1985
1	86	5	0	0	0	0	1	0	0	1	0	0	0	0	NA	NA	0	0	1	651	1	651
1	86	10	0	0	1	0	0	0	1	0	0	0	1	1	NA	NA	0	0	1	768	1	475
2	86	5	0	0	1	0	1	0	1	0	0	1	1	0	NA	NA	0	0	1	1463	1	508
1	93	5	0	0	0	0	1	0	1	0	0	0	0	1	NA	NA	0	0	1	137	1	137
2	86	2	0	0	0	1	0	0	1	0	1	0	0	1	NA	NA	0	0	1	1132	1	1132
2	86	3	0	0	1	0	0	1	0	0	0	0	0	0	metoprolol	NA	0	0	0	1866	0	1866
2	86	8	0	0	0	1	1	1	1	1	0	0	0	1	carvedilol	NA	0	0	0	1950	0	1950
2	86	8	0	0	1	0	0	1	0	0	0	0	1	0	metoprolol	NA	0	0	1	1235	1	1235
2	86	4	0	0	1	0	1	0	0	0	0	0	0	0	NA	NA	0	0	0	2112	0	2112
2	86	18	0	0	0	0	1	0	1	0	0	0	0	1	NA	NA	0	0	1	1211	1	1211
2	86	10	0	0	0	0	1	0	1	0	0	0	0	0	NA	NA	0	0	1	1146	1	1146
2	86	13	0	0	1	0	0	0	1	0	1	1	0	0	NA	NA	0	0	1	551	1	237
2	86	4	0	0	1	1	0	0	1	0	1	0	0	0	NA	NA	0	0	0	1922	0	1922
2	86	6	0	0	0	0	0	1	0	0	0	0	1	0	carvedilol	NA	0	0	1	629	1	629
1	86	7	0	0	0	1	1	0	1	0	1	0	0	1	NA	NA	0	0	0	2105	0	2105
2	86	1	0	0	1	0	0	1	0	0	0	0	0	0	carvedilol	NA	0	0	1	235	1	235
1	86	4	0	1	1	0	0	0	1	0	0	0	0	0	NA	doxazosin	0	0	1	414	1	414
2	86	5	0	0	1	0	1	0	1	0	0	0	0	0	NA	NA	0	0	1	1029	1	1023
2	86	9	0	0	0	0	0	1	1	0	0	1	0	0	metoprolol	NA	0	0	0	2033	1	859
1	86	7	0	1	1	0	0	0	0	0	1	0	0	0	NA	doxazosin	0	0	1	1610	1	1610
2	86	8	0	0	1	0	1	0	0	0	1	0	1	1	NA	NA	1	1	0	1797	0	1797
2	86	6	0	0	0	0	0	1	0	1	0	1	1	0	metoprolol	NA	0	0	0	1972	0	1972
2	86	3	0	0	0	0	0	1	0	0	0	0	0	0	carvedilol	NA	0	0	1	458	1	458
1	93	11	0	0	1	0	1	0	1	0	0	0	0	0	NA	NA	1	0	1	923	1	923
1	86	6	0	0	1	0	1	0	1	0	0	0	0	0	NA	NA	0	0	1	10	1	10
1	86	13	0	0	0	0	0	1	1	0	0	0	1	0	carvedilol	NA	0	1	1	1561	1	1561
1	86	4	1	0	0	0	1	1	1	0	0	1	1	1	carvedilol	NA	0	1	1	1092	1	1092
2	86	16	0	0	0	0	1	0	0	0	0	0	0	0	NA	NA	0	0	0	1926	0	1926
1	86	7	0	0	1	0	0	0	1	0	0	0	1	0	NA	NA	0	1	1	150	1	150
1	86	6	0	0	1	0	0	0	1	0	0	0	0	1	NA	NA	0	0	1	814	1	814
2	86	4	0	0	1	0	1	0	0	0	1	0	0	0	NA	NA	0	0	1	1918	1	1918
2	86	9	0	0	0	0	1	0	0	1	0	0	0	0	NA	NA	0	1	1	14	1	14
1	86	5	0	0	0	0	0	1	1	0	0	0	0	0	carvedilol	NA	0	0	1	1583	1	1236
1	86	8	0	0	1	0	1	1	1	0	0	0	0	1	carvedilol	NA	0	0	1	1365	1	1365
1	86	8	0	0	1	0	1	1	1	0	0	0	0	1	carvedilol	NA	0	0	1	824	1	794
1	86	5	0	1	0	1	0	0	0	0	0	0	1	0	NA	doxazosin	0	0	1	1472	1	1472
1	93	7	0	0	0	0	0	1	0	0	0	0	1	0	metoprolol	NA	0	1	1	155	1	155
1	85	7	0	0	1	0	0	0	0	0	0	0	0	0	NA	NA	0	0	1	812	1	812
2	86	9	0	0	1	0	0	0	0	0	0	0	0	0	NA	NA	0	0	1	994	1	989
2	86	12	0	0	1	0	0	0	1	0	0	0	0	0	NA	NA	0	0	0	1930	1	672
2	93	9	0	0	1	0	1	0	1	1	0	0	1	0	NA	NA	0	0	1	925	1	925
2	86	8	0	0	1	0	0	0	0	0	0	0	1	0	NA	NA	0	0	1	980	1	980
2	86	2	0	0	1	0	0	1	0	0	0	0	0	0	carvedilol	NA	0	0	1	446	1	446
2	86	6	0	0	1	1	0	0	1	0	0	0	0	0	NA	NA	0	1	0	1929	0	1929
2	86	7	0	0	0	0	0	1	0	0	0	0	0	0	carvedilol	NA	0	1	1	594	1	594
2	86	10	0	0	0	0	1	0	0	0	0	0	0	0	NA	NA	0	0	1	1718	1	1711
1	86	7	0	0	1	1	0	0	0	0	0	0	0	1	NA	NA	0	1	1	317	1	317
2	93	7	0	0	0	0	1	0	1	0	0	0	0	0	NA	NA	0	0	1	210	1	210
1	86	5	0	0	0	0	1	0	1	0	0	1	0	1	NA	NA	0	1	1	1296	1	720
1	86	8	0	0	1	0	0	1	1	0	0	0	1	0	carvedilol	NA	0	0	1	1011	1	1011
2	85	5	0	0	1	0	0	0	1	0	1	0	1	0	NA	NA	0	0	1	1376	1	1077
2	86	9	0	0	0	0	1	0	0	0	0	0	1	0	NA	NA	0	0	1	480	1	480
1	93	11	0	0	0	0	1	1	1	1	0	0	0	0	carvedilol	NA	0	0	1	189	1	189
1	86	7	0	0	1	0	0	1	1	1	0	0	0	1	metoprolol	NA	0	1	1	1435	1	1435
2	86	4	0	0	1	0	0	1	0	0	1	0	0	1	carvedilol	NA	0	0	1	80	1	80
2	93	7	0	0	0	1	0	1	1	0	0	1	0	0	carvedilol	NA	0	0	1	616	1	600
2	86	4	0	0	0	0	0	1	0	0	1	0	0	0	other	NA	0	0	1	1154	1	1154
2	86	7	0	0	1	0	1	1	1	1	0	0	1	0	carvedilol	NA	0	0	1	1373	1	1373
2	86	6	1	0	1	0	0	0	0	0	1	0	0	0	NA	NA	0	0	1	1451	1	808
2	86	5	0	0	0	1	1	1	1	0	0	0	1	0	carvedilol	NA	0	0	0	2004	0	2004
1	86	10	0	0	1	0	0	0	1	0	0	0	0	0	NA	NA	0	1	1	251	1	61
1	86	4	0	0	0	1	0	0	0	0	0	0	0	0	NA	NA	0	0	1	135	1	135
1	86	4	0	0	1	0	1	0	0	0	0	0	0	0	NA	NA	0	1	1	750	1	732
2	85	7	0	0	1	0	0	0	0	1	0	0	1	0	NA	NA	0	0	1	683	1	683
2	86	6	0	0	1	0	0	0	0	0	0	0	1	0	NA	NA	0	0	1	1374	1	1374
1	86	5	0	0	1	0	1	1	1	0	1	0	0	0	nebivolol	NA	0	0	1	1799	1	1799
2	86	4	0	0	0	0	1	0	0	0	0	0	0	0	NA	NA	0	0	1	501	1	472
2	86	8	0	0	1	0	1	0	1	1	0	1	0	1	NA	NA	0	0	1	1176	1	1176
2	86	8	1	0	1	0	0	0	0	0	0	0	0	0	NA	NA	0	0	1	1519	1	1519
2	86	6	0	0	0	0	1	1	1	1	0	0	1	0	carvedilol	NA	1	0	1	41	1	41
2	86	5	0	0	0	0	0	1	0	0	0	0	0	0	carvedilol	NA	0	0	1	1465	1	1465
1	86	4	0	0	1	0	0	0	0	0	0	1	1	0	NA	NA	0	0	0	1859	0	1859
1	86	3	0	1	0	0	1	0	1	0	0	0	1	0	NA	doxazosin	0	0	1	44	1	9
2	86	6	0	0	1	0	1	1	0	0	0	0	0	0	carvedilol	NA	0	0	1	445	1	355
2	85	3	0	0	1	0	0	0	0	0	0	0	0	0	NA	NA	0	0	1	1742	1	1742
1	86	5	0	0	1	0	1	0	0	0	0	0	0	0	NA	NA	0	0	1	340	1	340
2	86	3	0	0	1	0	0	0	1	0	0	0	0	0	NA	NA	0	0	1	72	1	72
1	86	10	0	1	0	0	0	1	1	0	1	0	1	0	nebivolol	doxazosin	0	0	1	576	1	575
2	86	5	0	0	1	0	0	1	1	0	1	0	0	0	bisoprolol	NA	0	1	0	2104	0	2104
2	86	6	0	0	0	0	0	1	0	0	0	0	1	0	carvedilol	NA	0	0	1	522	1	522
2	86	9	0	0	1	0	0	0	1	0	0	0	1	0	NA	NA	0	0	0	1858	1	123
1	86	14	0	0	1	0	0	0	1	0	0	0	0	0	NA	NA	0	0	1	132	1	132
2	93	3	0	0	1	0	1	1	1	0	0	0	1	0	carvedilol	NA	0	0	1	479	1	74
2	86	8	0	0	0	0	0	1	0	1	0	1	0	0	carvedilol	NA	0	0	1	678	1	678
2	86	6	0	0	1	0	0	0	1	0	0	0	0	1	NA	NA	0	0	0	1986	0	1986
2	86	7	0	0	1	0	0	0	0	0	0	0	0	0	NA	NA	0	0	1	118	1	118
2	93	6	0	0	0	1	0	1	0	0	0	0	0	0	other	NA	0	0	1	752	1	752
1	86	6	0	0	1	0	1	1	0	0	0	1	1	0	nebivolol	NA	0	0	1	485	1	485
2	86	7	0	0	1	0	1	0	1	1	0	1	1	0	NA	NA	0	0	1	1777	1	1777
2	86	5	0	0	1	0	0	0	1	0	0	0	1	1	NA	NA	0	1	0	2075	0	2075
2	86	5	0	0	1	0	1	0	1	0	0	0	0	0	NA	NA	0	0	1	1573	1	1573
2	86	3	0	0	1	0	1	1	1	0	0	0	0	0	carvedilol	NA	0	0	1	156	1	156
2	86	13	0	0	1	0	0	0	1	0	0	0	0	1	NA	NA	0	0	1	254	1	254
1	85	6	0	1	1	0	0	0	0	0	0	0	0	0	NA	doxazosin	0	0	1	8	1	8
2	86	11	0	0	1	0	1	1	1	1	0	0	0	0	carvedilol	NA	0	0	0	1988	0	1988
2	86	7	0	0	1	0	1	0	0	0	0	0	0	0	NA	NA	0	0	1	1711	1	308
2	86	5	0	0	1	0	1	0	1	0	1	0	0	0	NA	NA	0	0	1	367	1	367
2	86	6	0	0	1	0	1	0	0	1	0	0	1	0	NA	NA	0	0	1	1000	1	1000
1	93	6	0	0	1	0	1	0	0	0	0	0	0	0	NA	NA	0	0	1	1084	1	1084
1	86	6	0	0	1	0	0	0	1	0	0	0	1	1	NA	NA	0	0	1	427	1	427
2	93	11	0	0	1	0	0	0	0	1	0	1	0	0	NA	NA	0	0	1	60	1	60
2	86	5	0	0	1	0	0	0	0	0	0	0	0	0	NA	NA	0	0	1	846	1	846
2	86	5	0	0	0	1	0	0	1	1	0	0	1	0	NA	NA	0	0	1	302	1	302
2	86	8	0	0	1	0	0	0	0	0	0	0	0	1	NA	NA	0	0	1	170	1	170
2	86	6	0	0	1	0	1	0	0	0	1	0	1	0	NA	NA	0	0	0	2041	0	2041
1	85	13	0	0	0	0	1	1	1	1	0	1	0	0	carvedilol	NA	0	0	0	2118	1	1881
1	86	5	0	0	1	0	1	0	1	0	0	0	0	0	NA	NA	0	0	1	339	1	339
2	86	8	0	0	1	0	0	1	0	1	0	1	1	1	nebivolol	NA	0	1	0	1957	0	1957
2	86	7	0	0	0	0	0	1	1	0	0	0	1	0	carvedilol	NA	0	1	1	1247	1	760
1	99	8	0	0	1	0	0	0	1	0	0	0	0	0	NA	NA	0	0	1	691	1	691
2	85	9	0	0	1	0	0	1	0	0	0	0	0	0	carvedilol	NA	0	0	1	1202	1	1202
1	86	10	0	0	1	0	1	0	0	0	0	0	1	0	NA	NA	0	0	1	526	1	526
2	85	6	0	0	1	0	0	0	1	0	0	0	0	0	NA	NA	0	0	0	2134	0	2134
2	86	18	0	0	0	0	0	1	1	0	0	1	1	0	metoprolol	NA	0	0	0	2087	1	1165
2	85	8	0	0	1	0	1	1	1	0	1	1	0	0	bisoprolol	NA	0	0	1	874	1	854
2	93	8	0	0	1	0	0	1	1	0	0	0	0	0	bisoprolol	NA	0	0	1	1267	1	1267
2	86	8	1	0	0	0	0	1	0	1	0	0	0	0	carvedilol	NA	0	0	1	497	1	491
2	86	2	0	0	1	0	0	0	0	0	0	0	0	0	NA	NA	0	0	0	1941	0	1941
1	86	14	0	0	0	0	1	0	1	1	0	0	0	1	NA	NA	0	1	1	142	1	142
2	86	17	0	0	1	0	1	1	1	0	0	0	0	1	carvedilol	NA	1	0	1	1010	1	1010
1	86	2	0	0	1	0	0	0	0	0	0	0	0	0	NA	NA	0	0	0	2081	0	2081
2	86	20	1	0	1	0	1	0	1	0	0	0	0	0	NA	NA	0	0	1	696	1	696
2	93	9	0	0	0	1	0	0	1	0	1	0	1	0	NA	NA	0	0	1	280	1	280
2	86	4	0	0	1	0	0	0	0	0	0	0	0	1	NA	NA	0	0	1	1220	1	240
1	85	9	0	0	1	0	0	0	1	0	0	0	0	0	NA	NA	0	0	1	1092	1	59
2	93	7	0	0	0	0	1	0	0	0	0	0	0	0	NA	NA	0	0	1	984	1	984
2	86	4	0	0	1	0	0	0	0	0	1	0	0	1	NA	NA	0	0	1	314	1	263
2	85	6	0	0	1	0	1	1	0	0	0	0	0	0	carvedilol	NA	0	0	1	943	1	943
2	86	2	0	0	1	0	0	1	1	0	0	0	1	0	carvedilol	NA	0	0	0	1935	0	1935
1	86	10	0	0	1	0	1	1	0	0	0	0	0	1	carvedilol	NA	0	0	1	1782	1	1782
2	93	3	0	0	1	0	0	1	1	0	0	0	1	1	carvedilol	NA	0	1	1	594	1	594
1	86	7	0	0	1	0	1	0	0	0	0	0	1	1	NA	NA	0	0	1	1348	1	1073
2	86	8	0	0	1	0	0	1	0	1	1	1	1	1	carvedilol	NA	0	0	1	1153	1	458
2	86	6	0	0	0	0	0	1	1	0	0	0	1	0	metoprolol	NA	0	0	1	651	1	651
1	86	10	0	0	0	0	1	1	1	0	0	0	0	0	metoprolol	NA	0	0	1	110	1	66
2	86	6	0	0	1	0	0	0	1	0	0	1	0	0	NA	NA	0	0	1	1228	1	1228
2	86	7	0	0	1	0	0	1	0	0	1	1	0	0	metoprolol	NA	0	0	1	1345	1	670
2	86	6	0	0	1	1	1	1	1	0	1	0	1	0	metoprolol	NA	0	0	1	1513	1	1513
1	85	15	0	0	0	0	1	1	1	0	0	0	0	0	carvedilol	NA	0	0	1	1017	1	1017
2	85	6	0	0	1	0	0	0	1	0	0	0	1	0	NA	NA	0	0	1	1461	1	224
1	86	13	0	0	1	0	1	0	1	0	0	0	0	0	NA	NA	0	0	1	1604	1	1604
1	86	6	0	0	1	0	1	1	1	0	0	0	0	0	carvedilol	NA	0	0	1	3	1	3
1	86	5	0	0	1	0	0	0	1	0	0	0	1	1	NA	NA	0	1	1	535	1	535
2	86	6	0	0	1	0	0	0	1	1	0	0	0	1	NA	NA	0	0	0	1959	0	1959
1	86	6	0	0	0	1	0	0	0	0	1	0	0	0	NA	NA	0	0	1	42	1	42
2	86	11	0	0	1	1	0	0	1	0	0	0	0	0	NA	NA	0	1	1	1	1	1
2	86	5	0	0	1	0	1	1	1	1	0	0	1	0	carvedilol	NA	0	0	1	1678	1	1678
2	85	2	0	0	1	0	0	0	1	0	1	0	0	1	NA	NA	0	0	1	722	1	722
2	86	14	0	0	0	0	0	1	0	0	0	0	0	0	carvedilol	NA	0	1	1	546	1	546
2	86	7	0	0	0	0	0	1	1	0	0	0	0	0	bisoprolol	NA	0	0	1	774	1	774
2	86	4	0	0	1	0	0	1	0	0	0	0	0	1	nebivolol	NA	0	0	1	407	1	406
1	86	5	0	0	0	0	1	0	0	0	0	0	0	0	NA	NA	0	0	1	237	1	237
1	86	5	0	1	1	0	0	0	1	0	0	0	1	0	NA	doxazosin	0	0	0	1799	0	1799
2	86	7	0	0	0	1	1	1	1	0	1	0	1	0	carvedilol	NA	0	0	1	631	1	631
2	86	8	0	0	1	0	1	0	0	0	1	0	0	0	NA	NA	0	0	1	29	1	29
1	86	9	0	0	0	0	1	1	0	0	0	0	1	0	carvedilol	NA	0	0	0	1815	0	1815
2	86	4	0	0	0	0	0	1	1	0	0	1	1	1	metoprolol	NA	0	0	1	101	1	101
1	86	5	0	0	0	0	1	0	1	0	0	0	1	0	NA	NA	0	0	0	1940	0	1940
1	86	12	0	0	1	0	0	1	0	0	0	0	0	0	nebivolol	NA	0	1	0	2062	0	2062
2	85	2	0	0	0	0	1	0	0	0	0	1	0	0	NA	NA	0	0	1	34	1	34
1	86	12	0	0	0	0	0	1	1	0	0	1	0	0	carvedilol	NA	0	0	1	1789	1	1789
2	86	2	0	0	0	0	1	0	1	0	0	0	0	0	NA	NA	0	0	1	5	1	5
2	85	8	0	0	0	0	1	0	0	0	0	0	0	0	NA	NA	0	0	1	1036	1	1036
2	86	5	0	0	1	0	1	1	1	0	0	0	1	1	carvedilol	NA	0	0	1	31	1	31
2	86	9	0	0	1	0	0	0	1	0	0	1	1	1	NA	NA	0	0	1	1135	1	329
1	86	14	0	0	0	0	1	1	0	1	0	1	0	0	metoprolol	NA	0	0	1	1038	1	1038
2	93	6	0	0	0	1	0	0	0	0	0	0	1	0	NA	NA	0	0	1	1231	1	1231
1	100	7	0	0	0	0	1	0	0	1	0	0	0	0	NA	NA	0	0	1	361	1	346
2	86	5	0	0	1	0	0	0	0	0	0	0	0	0	NA	NA	0	0	0	1860	0	1860
1	86	9	0	0	1	0	1	0	1	0	0	0	1	0	NA	NA	0	0	1	96	1	96
2	86	16	0	0	1	0	1	0	1	0	0	0	0	0	NA	NA	0	0	1	289	1	289
1	86	13	0	0	1	0	1	1	1	0	0	1	0	0	carvedilol	NA	0	0	1	770	1	770
2	86	7	0	0	0	1	0	0	0	0	1	0	1	0	NA	NA	0	1	0	1936	1	704
2	85	13	0	0	1	0	0	0	0	0	0	0	1	0	NA	NA	0	0	1	1254	1	1070
2	86	6	0	0	1	0	0	0	1	0	0	0	0	0	NA	NA	0	0	1	13	1	13
2	86	3	0	0	1	0	0	0	1	0	0	0	1	0	NA	NA	0	0	0	2031	0	2031
2	86	9	0	0	1	0	0	1	0	0	0	0	1	1	carvedilol	NA	1	0	0	1936	0	1936
2	86	17	0	0	0	0	0	1	1	0	0	1	0	0	carvedilol	NA	0	0	0	1989	1	309
1	85	6	0	0	0	1	1	0	1	0	1	0	1	0	NA	NA	0	0	1	1715	1	962
2	86	8	0	0	1	0	0	1	1	1	0	0	0	0	nebivolol	NA	0	0	1	390	1	390
2	86	14	0	0	1	0	0	0	0	0	0	0	0	0	NA	NA	0	0	1	48	1	48
2	86	7	0	0	0	0	0	1	1	0	0	0	0	0	other	NA	0	0	1	38	1	38
1	86	17	0	0	1	0	1	0	0	0	0	0	0	0	NA	NA	0	0	1	1069	1	1041
2	86	14	0	0	1	0	0	0	1	0	0	0	0	0	NA	NA	0	0	0	1874	0	1874
2	86	3	0	0	0	1	1	0	0	0	0	0	0	1	NA	NA	0	0	1	1843	1	1843
2	86	8	0	0	0	1	1	1	1	0	1	0	1	1	carvedilol	NA	0	0	0	1839	0	1839
2	93	3	0	0	1	0	0	1	1	0	0	0	1	0	nebivolol	NA	0	0	1	9	1	9
2	86	6	0	0	0	0	1	1	0	0	0	0	0	0	carvedilol	NA	0	1	0	1956	0	1956
2	86	4	0	0	0	0	1	0	0	0	0	1	1	0	NA	NA	0	0	0	2041	0	2041
2	93	7	0	0	1	0	0	0	0	1	0	0	0	0	NA	NA	0	0	1	149	1	149
2	86	13	0	0	0	1	0	0	0	0	0	0	1	1	NA	NA	0	0	1	17	1	17
2	85	2	0	0	1	0	0	0	0	0	0	0	0	0	NA	NA	0	0	0	2104	1	1521
1	86	8	0	0	1	0	0	0	0	0	0	0	0	0	NA	NA	0	0	1	726	1	726
2	85	19	0	0	0	0	0	1	1	1	0	0	0	0	carvedilol	NA	0	0	0	2138	1	1303
2	86	26	0	0	1	0	1	1	1	1	0	1	1	1	carvedilol	NA	0	0	1	92	1	92
1	86	7	0	0	1	0	1	0	0	0	0	1	0	0	NA	NA	0	0	0	1858	0	1858
2	86	3	0	0	1	0	0	1	1	0	0	0	1	1	carvedilol	NA	0	1	1	1310	1	1310
2	86	8	0	0	0	0	0	1	1	1	0	0	0	0	carvedilol	NA	1	0	1	582	1	582
2	86	6	0	0	1	0	1	1	1	0	0	0	0	1	carvedilol	NA	0	0	1	1549	1	1549
2	86	13	0	0	0	1	0	0	0	0	0	0	0	0	NA	NA	0	0	0	1788	1	1021
1	86	4	0	0	0	0	1	0	1	0	0	0	0	0	NA	NA	0	0	1	226	1	226
2	86	4	0	0	0	1	0	0	0	0	1	0	1	0	NA	NA	0	0	0	2052	0	2052
2	86	6	0	0	0	0	0	1	0	0	0	0	0	1	carvedilol	NA	0	0	1	1100	1	603
2	86	2	0	0	1	0	0	0	0	0	0	0	1	0	NA	NA	0	0	1	373	1	373
2	86	7	0	0	0	0	1	0	1	0	0	1	1	0	NA	NA	0	0	1	29	1	29
2	86	3	0	0	1	0	0	0	1	0	0	0	0	1	NA	NA	0	0	1	195	1	195
2	86	7	0	0	1	0	0	0	1	0	1	0	0	0	NA	NA	0	0	0	2003	0	2003
2	86	9	1	0	0	0	1	0	1	0	0	0	0	0	NA	NA	0	0	1	307	1	307
2	86	7	0	0	1	0	1	0	1	0	0	0	0	0	NA	NA	0	0	1	393	1	393
2	86	8	0	0	1	0	0	0	1	0	1	0	0	1	NA	NA	0	0	0	2083	0	2083
2	86	5	0	0	1	0	0	1	1	0	0	0	1	1	nebivolol	NA	0	0	1	1860	1	1860
2	86	6	0	0	1	0	0	1	0	0	0	0	1	0	carvedilol	NA	0	0	1	121	1	121
1	86	3	0	0	0	0	0	1	0	0	0	0	1	0	carvedilol	NA	0	0	0	1962	0	1962
1	86	12	0	1	1	0	0	0	1	0	1	0	1	0	NA	doxazosin	0	0	1	664	1	663
2	86	6	0	0	1	0	0	0	0	0	0	0	0	0	NA	NA	0	0	0	1964	0	1964
2	86	5	0	0	0	1	1	1	0	0	0	0	0	0	carvedilol	NA	0	1	1	737	1	313
2	85	5	0	0	1	0	1	1	0	1	0	0	0	1	carvedilol	NA	0	0	0	2112	1	654
2	86	16	0	0	0	0	1	1	1	1	0	0	1	1	metoprolol	NA	0	0	1	1156	1	1122
2	86	3	0	0	0	0	1	0	1	0	1	1	1	0	NA	NA	0	1	0	2067	0	2067
2	86	5	0	0	1	0	0	0	1	0	0	0	0	1	NA	NA	0	0	1	552	1	552
2	86	4	0	0	0	0	1	0	1	0	0	0	0	1	NA	NA	0	1	1	450	1	425
1	85	8	0	0	0	0	1	1	1	0	0	0	0	0	carvedilol	NA	0	0	1	1177	1	1177
1	86	6	0	0	1	0	0	1	0	0	0	0	1	0	metoprolol	NA	0	1	0	1983	0	1983
2	86	2	0	0	1	0	1	1	0	0	0	0	0	1	other	NA	0	0	0	2055	0	2055
1	85	9	0	0	1	0	0	0	0	0	1	0	1	0	NA	NA	0	0	1	1462	1	1462
1	86	11	0	0	0	0	0	1	0	0	0	0	0	0	nebivolol	NA	0	0	1	992	1	992
2	86	11	0	0	0	1	0	0	0	1	0	0	0	0	NA	NA	0	0	0	2077	1	988
1	86	13	0	0	1	0	0	1	0	0	0	0	0	0	other	NA	0	1	1	1462	1	1462
1	86	7	0	0	0	0	1	1	1	0	0	0	0	0	carvedilol	NA	0	0	1	99	1	99
1	93	3	0	0	1	1	0	0	1	0	0	0	1	0	NA	NA	0	0	1	22	1	22
2	86	2	0	0	0	0	1	1	0	0	0	0	1	1	carvedilol	NA	0	0	0	1966	0	1966
2	86	14	0	0	1	0	0	0	1	0	0	0	0	0	NA	NA	0	0	1	885	1	590
2	86	12	0	0	1	0	0	0	0	0	1	0	0	0	NA	NA	0	0	0	1804	0	1804
2	86	7	0	0	0	1	0	0	0	0	0	0	1	0	NA	NA	0	0	0	2048	0	2048
1	93	6	0	0	1	0	0	0	1	1	0	0	0	0	NA	NA	0	0	1	409	1	409
2	86	7	0	0	1	0	0	1	0	0	1	1	0	0	carvedilol	NA	0	0	1	53	1	53
2	86	5	0	0	1	0	1	0	0	1	0	0	0	0	NA	NA	0	0	1	400	1	400
2	86	6	0	0	0	0	1	0	1	0	0	0	0	0	NA	NA	0	0	1	104	1	104
1	86	11	0	0	0	0	1	0	1	1	0	1	1	0	NA	NA	0	1	1	1463	1	1463
2	86	7	0	0	1	0	1	1	1	0	0	0	1	1	nebivolol	NA	0	1	1	1684	1	995
1	86	3	0	0	1	0	0	0	0	0	0	0	0	0	NA	NA	0	0	1	1409	1	1409
2	86	10	0	0	1	0	1	0	1	0	0	0	1	0	NA	NA	0	0	0	1986	0	1986
1	86	6	0	0	1	0	1	0	1	0	1	0	0	0	NA	NA	0	0	1	810	1	810
1	86	5	0	0	1	0	1	1	0	0	0	0	0	0	carvedilol	NA	0	0	1	704	1	704
2	86	12	0	0	0	0	0	1	0	0	0	0	0	0	nebivolol	NA	0	0	0	1818	0	1818
1	85	11	0	0	1	0	0	0	0	1	0	0	1	0	NA	NA	0	1	0	2104	0	2104
2	86	6	0	0	0	0	1	0	1	0	0	0	0	0	NA	NA	0	0	1	318	1	318
2	86	2	0	0	1	0	1	1	1	0	0	0	1	0	bisoprolol	NA	0	0	1	907	1	906
1	86	9	0	0	0	0	1	0	1	0	0	0	1	0	NA	NA	0	0	1	461	1	207
2	93	10	0	0	1	1	1	1	0	0	1	0	1	1	carvedilol	NA	0	0	1	594	1	594
2	86	6	0	0	0	0	1	1	1	0	0	0	1	0	carvedilol	NA	0	0	1	147	1	147
2	85	8	0	0	1	0	0	0	1	0	0	0	0	1	NA	NA	0	0	1	32	1	32
2	86	11	0	0	1	0	1	1	1	0	0	0	0	0	carvedilol	NA	0	0	1	1776	1	1776
1	86	6	0	0	1	0	0	0	0	0	0	0	0	0	NA	NA	0	0	0	2082	0	2082
1	86	15	0	0	0	0	1	1	1	1	1	0	1	1	carvedilol	NA	0	0	1	553	1	537
2	86	7	0	0	1	0	0	0	1	0	0	0	0	1	NA	NA	0	0	1	74	1	74
2	85	6	0	0	1	0	0	1	1	0	0	0	1	0	carvedilol	NA	0	0	1	1158	1	1158
1	86	3	0	1	0	1	1	0	0	0	0	0	0	0	NA	doxazosin	0	0	1	1738	1	993
2	100	11	0	0	0	0	1	1	1	0	0	0	1	0	carvedilol	NA	0	0	1	27	1	27
2	86	6	0	0	0	0	1	0	1	1	0	1	0	0	NA	NA	0	0	0	2017	0	2017
2	86	4	0	0	0	0	0	1	0	0	0	0	0	0	nebivolol	NA	0	0	1	1145	1	1145
1	93	8	0	1	0	0	1	0	1	1	0	0	0	0	NA	doxazosin	0	0	1	583	1	583
2	86	8	0	0	1	0	0	0	0	0	0	0	0	0	NA	NA	0	0	0	1971	0	1971
2	86	7	0	0	1	0	1	0	0	0	1	0	0	0	NA	NA	0	0	0	1977	0	1977
1	86	13	0	0	1	0	1	0	0	0	1	0	0	0	NA	NA	0	0	0	1992	1	1139
2	86	5	0	0	1	0	0	1	0	0	0	0	0	0	bisoprolol	NA	0	0	1	722	1	722
1	86	8	0	0	1	0	0	0	0	0	0	0	0	0	NA	NA	0	0	0	1845	1	1089
2	85	5	0	0	1	0	1	1	0	0	0	1	1	0	metoprolol	NA	0	1	1	883	1	883
2	86	6	1	0	1	0	1	0	1	0	0	0	1	0	NA	NA	0	1	0	1835	0	1835
1	85	12	0	0	1	0	1	0	1	0	1	1	0	1	NA	NA	0	0	1	733	1	733
2	86	22	0	0	1	0	1	1	1	0	0	0	0	0	carvedilol	NA	0	0	0	1838	0	1838
2	86	8	0	0	1	0	0	0	1	0	0	0	0	0	NA	NA	0	0	1	279	1	279
2	85	6	0	0	1	0	0	1	1	0	0	0	1	1	carvedilol	NA	0	0	1	197	1	197
2	85	4	0	0	0	0	0	1	0	0	0	1	0	1	other	NA	0	0	1	742	1	742
2	93	12	0	0	1	0	0	1	0	0	0	0	0	0	nebivolol	NA	0	0	1	1726	1	215
2	85	7	0	0	1	0	0	0	1	0	0	0	1	0	NA	NA	0	1	0	2089	0	2089
2	86	7	0	0	1	1	0	0	1	0	0	0	0	0	NA	NA	0	0	1	576	1	507
2	86	7	0	0	1	0	0	0	1	0	0	0	0	0	NA	NA	0	0	0	1794	0	1794
2	85	8	1	0	0	0	1	1	1	0	0	0	1	0	metoprolol	NA	1	0	1	279	1	279
2	86	5	0	0	0	0	1	0	0	0	0	0	0	0	NA	NA	0	0	1	15	1	15
2	93	5	0	0	0	0	1	0	0	1	0	0	0	0	NA	NA	0	0	1	87	1	87
1	93	8	0	0	1	0	0	1	1	0	0	1	0	0	carvedilol	NA	0	0	1	1677	1	1677
2	85	5	0	0	1	0	0	0	1	0	1	0	1	0	NA	NA	0	0	1	1559	1	1559
2	85	9	0	0	1	0	0	0	0	0	0	0	1	0	NA	NA	0	0	1	361	1	361
2	93	8	0	0	1	0	1	1	1	1	0	0	0	0	carvedilol	NA	0	1	1	980	1	980
1	86	2	0	0	0	0	1	0	1	0	0	0	0	0	NA	NA	0	0	1	205	1	205
2	85	5	0	0	1	0	0	0	1	0	1	0	0	0	NA	NA	0	0	1	243	1	243
2	85	3	0	0	1	0	1	1	1	0	1	0	0	0	other	NA	0	0	0	2124	1	1039
2	93	5	0	0	1	0	0	0	0	0	0	0	0	0	NA	NA	0	0	1	1553	1	1553
2	85	7	0	0	1	0	0	0	1	0	0	0	0	0	NA	NA	0	0	1	1059	1	1059
2	85	5	0	0	0	0	1	0	0	0	1	0	1	0	NA	NA	0	0	1	876	1	876
1	86	2	0	1	0	1	0	0	1	0	0	1	0	0	NA	doxazosin	0	0	0	1865	1	864
2	86	10	0	0	0	0	1	1	0	1	1	1	1	0	nebivolol	NA	0	1	0	1789	0	1789
1	85	6	0	0	0	0	1	0	1	0	0	1	1	0	NA	NA	0	0	1	1030	1	893
2	85	16	0	0	1	0	1	0	1	0	1	0	0	1	NA	NA	0	0	1	384	1	337
2	85	5	0	0	1	0	1	0	1	1	0	0	1	0	NA	NA	0	0	1	194	1	130
1	86	8	0	0	1	0	0	0	0	1	0	0	0	1	NA	NA	0	1	1	198	1	194
2	86	7	0	0	0	0	1	0	0	1	0	0	0	0	NA	NA	0	0	1	696	1	696
2	93	9	0	0	0	1	1	1	0	0	0	0	0	0	carvedilol	NA	0	0	1	937	1	937
2	86	5	0	0	0	0	1	0	0	0	0	0	0	0	NA	NA	0	0	1	1288	1	548
2	86	5	0	0	0	1	1	1	1	0	0	0	0	0	other	NA	0	0	1	1580	1	1580
2	85	8	0	0	0	0	1	1	0	0	0	0	0	1	metoprolol	NA	0	0	1	90	1	90
1	86	10	0	1	1	0	1	0	1	0	1	0	0	0	NA	doxazosin	0	0	1	373	1	373
1	85	8	0	0	1	0	1	0	1	0	0	0	0	0	NA	NA	0	0	1	214	1	214
2	86	6	0	0	1	0	0	0	0	0	0	0	0	0	NA	NA	0	1	0	2041	0	2041
1	86	9	0	0	1	0	0	0	0	0	0	0	0	0	NA	NA	0	0	0	1954	0	1954
1	85	7	0	0	1	0	1	0	1	0	0	0	0	0	NA	NA	0	0	1	980	1	972
1	85	7	0	0	0	0	0	1	1	0	0	0	0	0	carvedilol	NA	0	0	1	505	1	505
2	86	10	0	0	1	0	0	0	1	0	0	1	0	0	NA	NA	0	0	1	1845	1	1845
2	86	6	0	0	0	1	0	1	0	0	0	0	0	0	bisoprolol	NA	0	0	1	325	1	325
2	85	5	0	0	0	0	1	1	1	0	1	1	0	0	metoprolol	NA	0	0	0	2083	0	2083
1	86	4	0	0	1	0	0	0	0	0	0	0	0	0	NA	NA	1	0	1	908	1	435
1	86	7	0	0	1	0	0	1	0	0	0	1	0	0	carvedilol	NA	0	0	1	163	1	163
1	85	7	0	0	0	1	0	0	0	1	0	0	0	0	NA	NA	0	0	0	2133	0	2133
2	93	4	0	0	0	1	0	0	0	0	0	0	0	0	NA	NA	0	0	1	342	1	342
1	85	6	0	0	1	0	0	0	0	0	0	0	0	1	NA	NA	0	0	1	901	1	901
2	86	7	0	0	1	0	0	0	0	0	0	0	0	0	NA	NA	0	0	1	857	1	857
2	86	14	0	0	0	0	1	0	1	0	0	0	0	0	NA	NA	0	0	1	868	1	841
1	86	6	0	0	1	0	1	1	1	0	0	0	0	0	carvedilol	NA	0	0	0	1870	1	460
2	85	7	0	0	0	0	1	0	1	0	0	0	1	0	NA	NA	0	0	1	326	1	326
2	86	6	0	0	1	0	0	1	0	0	0	0	1	0	carvedilol	NA	0	0	1	292	1	292
1	85	4	0	0	1	0	1	1	0	0	0	0	0	1	nebivolol	NA	0	0	1	727	1	727
2	86	7	1	0	1	0	1	1	1	1	0	0	1	0	carvedilol	NA	0	1	1	194	1	194
2	86	11	0	0	1	0	0	0	1	1	1	1	0	0	NA	NA	0	0	1	241	1	241
1	86	8	0	0	1	0	1	1	1	1	0	1	0	0	carvedilol	NA	0	0	1	3	1	3
2	85	8	0	0	0	0	0	1	1	1	1	0	1	1	nebivolol	NA	0	0	1	367	1	367
2	93	5	0	0	0	0	1	0	0	1	0	0	0	0	NA	NA	0	0	1	396	1	396
2	86	4	0	0	1	0	0	0	0	1	0	0	0	0	NA	NA	0	0	1	819	1	78
2	85	8	0	0	1	0	0	1	0	0	0	0	0	0	carvedilol	NA	0	0	1	1321	1	1321
2	86	8	0	0	0	0	1	1	0	0	0	0	1	0	carvedilol	NA	0	0	0	2039	0	2039
1	86	4	0	0	0	0	0	1	0	0	0	0	0	0	carvedilol	NA	0	0	1	1127	1	1127
2	93	18	0	0	1	0	1	1	0	0	0	0	1	0	other	NA	0	0	1	235	1	73
2	85	11	0	0	1	0	0	1	1	0	0	1	1	0	carvedilol	NA	0	1	0	2126	0	2126
1	86	6	0	0	0	0	1	1	1	1	1	0	0	0	carvedilol	NA	0	0	1	997	1	997
2	85	11	0	0	0	0	0	1	0	0	0	0	0	0	other	NA	0	1	0	2090	1	1174
2	86	5	0	0	1	0	1	0	0	0	0	0	1	0	NA	NA	0	0	1	542	1	516
1	85	3	0	0	1	0	0	1	1	0	0	0	1	1	bisoprolol	NA	0	0	1	936	1	367
1	86	6	0	0	1	0	0	0	0	0	0	0	1	0	NA	NA	0	0	0	1989	1	1260
2	86	6	0	0	0	1	1	1	1	0	0	1	0	0	carvedilol	NA	0	0	1	1312	1	395
2	93	10	0	0	0	0	0	1	1	1	0	0	0	0	carvedilol	NA	0	0	1	219	1	219
1	85	5	0	0	1	0	0	1	1	1	0	0	0	0	carvedilol	NA	1	0	1	146	1	146
2	86	5	0	0	0	1	0	1	0	1	0	0	1	1	carvedilol	NA	0	0	1	660	1	563
2	86	6	0	1	1	0	0	1	1	0	0	0	0	0	nebivolol	doxazosin	0	1	0	1957	0	1957
2	86	14	0	0	1	0	0	1	0	0	1	1	0	1	bisoprolol	NA	0	0	1	1305	1	1305
1	86	11	0	1	0	0	1	0	0	0	0	0	0	0	NA	doxazosin	0	0	1	1489	1	291
2	86	3	0	0	0	0	1	0	1	1	1	0	0	0	NA	NA	0	0	1	1444	1	1444
2	86	5	0	0	1	0	0	1	0	1	0	0	1	0	metoprolol	NA	0	0	0	1838	0	1838
2	86	7	0	0	1	0	0	1	1	0	0	0	0	1	nebivolol	NA	0	1	1	47	1	47
2	85	6	0	0	1	0	0	0	1	0	1	0	0	1	NA	NA	0	0	1	42	1	33
2	85	11	0	0	0	0	1	1	1	0	0	0	0	0	metoprolol	NA	0	0	1	177	1	177
2	92	5	0	0	1	0	1	0	0	0	1	0	0	0	NA	NA	0	0	1	1486	1	1486
1	86	19	1	0	0	0	1	0	0	0	0	1	0	0	NA	NA	0	0	1	297	1	27
1	85	8	0	0	1	0	0	1	1	0	0	0	0	0	carvedilol	NA	0	0	1	871	1	870
2	86	9	0	0	1	0	0	1	0	0	0	0	0	1	carvedilol	NA	0	0	0	2034	0	2034
2	86	7	0	0	0	0	0	1	1	0	0	0	0	1	carvedilol	NA	0	0	0	1829	0	1829
2	85	10	0	0	1	0	0	0	0	1	0	0	1	0	NA	NA	0	0	1	2022	1	2022
2	86	8	0	0	0	0	1	0	0	0	0	0	0	0	NA	NA	0	0	1	1160	1	1160
1	86	9	0	0	1	0	1	0	1	0	1	0	0	0	NA	NA	0	0	1	974	1	974
1	86	4	0	0	0	0	1	1	1	0	1	0	0	0	carvedilol	NA	0	1	1	195	1	195
2	86	5	0	0	0	1	1	1	0	1	0	0	0	0	carvedilol	NA	0	1	0	1929	0	1929
2	85	3	0	0	0	1	0	1	0	0	0	0	0	0	metoprolol	NA	0	0	0	2143	0	2143
2	86	9	0	0	1	0	1	0	1	0	0	0	0	1	NA	NA	0	0	1	1321	1	434
2	86	6	0	0	0	0	0	1	1	1	0	0	0	0	carvedilol	NA	0	0	1	796	1	291
2	93	6	0	0	0	0	1	1	0	0	1	0	1	0	carvedilol	NA	0	0	1	1272	1	1272
2	85	3	0	0	1	0	1	1	1	0	0	0	1	0	bisoprolol	NA	0	0	1	324	1	324
2	85	15	0	0	1	0	1	0	1	1	0	0	0	0	NA	NA	0	0	1	17	1	17
1	86	4	0	1	0	1	0	0	1	0	1	0	1	0	NA	doxazosin	0	0	0	1866	0	1866
1	86	3	0	0	1	0	0	1	1	0	1	0	1	0	carvedilol	NA	1	1	1	444	1	444
2	86	3	0	0	1	0	1	0	1	0	0	0	1	0	NA	NA	0	0	1	1785	1	1750
2	85	8	0	0	1	0	1	1	1	1	0	0	1	0	nebivolol	NA	0	0	1	5	1	5
1	86	4	0	0	0	0	1	0	1	0	1	0	1	0	NA	NA	0	0	0	1920	0	1920
1	85	2	0	0	1	0	1	1	1	0	0	0	0	1	bisoprolol	NA	0	0	1	1139	1	1139
2	85	11	0	0	1	0	0	0	0	0	0	0	1	0	NA	NA	0	0	0	2107	0	2107
1	86	12	0	0	1	0	1	0	1	0	0	0	1	0	NA	NA	0	0	0	2034	0	2034
2	85	6	0	0	1	0	0	0	0	0	1	0	1	1	NA	NA	0	0	1	529	1	529
2	93	7	0	0	1	0	1	1	1	1	0	0	0	0	carvedilol	NA	0	0	1	820	1	820
2	85	7	0	0	1	0	0	0	0	0	1	0	0	0	NA	NA	0	0	1	1389	1	1297
2	85	7	0	0	0	0	0	1	0	0	0	0	0	0	metoprolol	NA	0	0	1	1499	1	797
2	93	8	0	0	0	0	1	1	1	0	0	0	0	0	carvedilol	NA	0	0	1	1774	1	38
1	86	19	0	0	0	0	1	1	0	0	0	0	0	0	metoprolol	NA	0	0	1	20	1	20
1	86	7	0	0	1	0	0	0	0	0	0	0	0	0	NA	NA	0	0	1	626	1	626
1	85	7	0	0	1	0	0	1	0	0	0	0	0	0	carvedilol	NA	0	0	1	18	1	18
1	86	2	0	0	0	1	0	0	0	0	0	0	1	0	NA	NA	0	0	1	1025	1	888
2	86	9	0	0	1	0	0	0	1	0	0	0	0	0	NA	NA	0	0	1	1335	1	382
2	85	9	0	0	0	0	0	1	0	0	0	0	1	0	carvedilol	NA	0	0	1	921	1	917
2	86	3	0	0	1	0	1	1	0	0	0	1	1	1	carvedilol	NA	0	0	1	1631	1	1630
2	86	6	0	0	1	0	0	1	0	0	0	1	1	0	carvedilol	NA	0	0	1	915	1	915
2	93	7	0	0	1	0	0	0	0	0	0	0	0	1	NA	NA	0	0	1	210	1	210
2	93	3	0	0	0	0	0	1	1	0	0	0	0	0	other	NA	0	0	1	518	1	508
2	93	4	0	0	0	1	0	0	1	0	1	0	0	0	NA	NA	0	0	1	1103	1	1100
2	86	8	0	0	1	0	0	0	1	0	0	0	1	0	NA	NA	1	0	1	445	1	157
1	85	7	0	0	0	0	0	1	1	0	0	1	0	1	bisoprolol	NA	0	0	0	2124	1	1469
2	86	12	0	0	1	0	1	1	0	0	0	0	0	0	carvedilol	NA	0	0	1	887	1	884
2	93	5	0	0	0	0	0	1	1	0	0	0	0	0	carvedilol	NA	0	0	1	1530	1	1530
1	85	9	0	0	1	0	0	0	0	0	0	0	0	0	NA	NA	0	1	1	394	1	155
2	86	11	0	0	0	0	0	1	1	0	0	0	0	0	carvedilol	NA	0	0	0	1991	0	1991
2	86	4	0	0	1	0	1	0	0	0	0	0	0	0	NA	NA	0	1	0	2039	0	2039
2	86	16	0	0	0	0	0	1	1	0	1	0	0	1	metoprolol	NA	0	0	1	590	1	590
2	86	14	1	0	1	0	0	0	1	0	0	0	0	1	NA	NA	0	0	1	975	1	973
2	86	6	0	0	1	0	0	1	0	0	0	0	1	0	carvedilol	NA	0	0	0	1940	0	1940
2	86	4	0	0	0	0	0	1	0	0	0	0	1	0	carvedilol	NA	0	0	0	2058	0	2058
2	86	4	0	0	1	0	1	0	1	0	0	0	1	1	NA	NA	0	1	0	1984	0	1984
2	86	6	0	0	1	0	0	0	0	0	0	0	0	0	NA	NA	0	0	1	695	1	695
1	85	13	0	1	1	0	0	0	1	0	0	0	0	0	NA	doxazosin	0	0	1	18	1	18
2	86	7	0	0	0	0	1	0	1	0	0	0	1	0	NA	NA	0	0	1	157	1	157
1	85	3	0	1	1	0	1	1	1	0	0	0	1	0	carvedilol	doxazosin	0	0	0	2097	1	1137
2	86	7	0	0	0	1	0	0	0	0	1	1	0	1	NA	NA	0	0	0	1807	0	1807
2	86	6	0	0	0	1	0	0	0	0	0	0	1	0	NA	NA	0	0	0	1943	1	1830
2	85	4	0	0	1	0	0	0	0	1	0	0	0	0	NA	NA	0	0	1	246	1	246
2	85	6	0	0	0	0	1	1	0	0	0	0	0	0	nebivolol	NA	0	0	1	1519	1	436
2	86	3	0	0	1	0	0	1	1	0	0	0	0	0	metoprolol	NA	0	0	1	932	1	915
2	86	18	0	1	0	1	0	0	0	0	1	0	0	1	NA	doxazosin	0	0	1	50	1	50
2	86	7	0	0	1	0	0	1	0	0	0	0	0	0	carvedilol	NA	0	0	0	1912	0	1912
2	86	5	0	0	1	0	0	0	1	0	0	0	0	0	NA	NA	0	0	0	2062	0	2062
2	86	3	0	0	1	0	0	0	0	0	0	0	0	0	NA	NA	0	0	1	1381	1	527
1	86	8	0	1	0	1	0	0	1	0	0	0	0	0	NA	doxazosin	0	0	1	1148	1	1148
2	86	4	0	0	0	0	0	1	0	1	0	0	1	0	carvedilol	NA	0	0	1	482	1	482
2	86	9	0	0	1	0	0	1	1	0	1	0	0	0	carvedilol	NA	0	0	1	553	1	553
1	86	3	0	0	1	0	0	0	1	0	0	0	1	1	NA	NA	0	0	0	2026	0	2026
1	86	2	0	0	0	0	1	0	1	0	0	0	0	0	NA	NA	0	0	1	617	1	617
2	86	11	0	0	1	0	0	0	1	0	0	0	1	0	NA	NA	0	0	1	18	1	18
2	86	2	0	0	1	0	1	0	1	0	1	0	1	1	NA	NA	0	0	1	1358	1	1358
2	85	17	0	0	0	0	0	1	0	0	0	0	0	0	carvedilol	NA	0	0	0	2067	0	2067
2	86	4	0	0	1	0	0	0	1	0	0	0	1	0	NA	NA	0	0	0	1986	0	1986
1	85	3	0	0	1	0	1	0	0	0	0	0	0	0	NA	NA	0	0	1	642	1	642
2	86	7	0	0	0	0	1	0	0	0	1	0	0	1	NA	NA	0	1	1	1451	1	1451
1	86	6	0	0	0	0	1	1	0	0	1	0	0	0	carvedilol	NA	0	0	1	243	1	243
2	86	5	0	0	0	1	0	0	0	0	0	0	0	0	NA	NA	0	0	0	1915	0	1915
2	93	5	0	0	0	1	0	1	1	0	1	0	0	0	bisoprolol	NA	0	0	1	815	1	815
1	93	15	0	1	1	0	1	0	1	0	0	0	1	0	NA	doxazosin	0	1	1	7	1	7
1	85	8	0	0	0	0	1	0	1	1	1	0	0	0	NA	NA	0	0	1	184	1	184
2	86	5	0	0	1	0	0	0	0	0	0	0	0	0	NA	NA	0	0	0	1984	0	1984
2	85	7	0	0	1	0	1	0	1	0	0	0	1	1	NA	NA	0	0	1	564	1	396
2	86	5	0	0	1	0	0	0	0	0	0	0	0	0	NA	NA	0	1	1	97	1	97
1	86	8	0	0	1	0	1	0	1	0	0	1	0	0	NA	NA	0	0	0	2054	0	2054
1	93	3	0	0	1	0	0	0	1	0	1	0	0	0	NA	NA	0	0	1	1050	1	1050
2	86	6	0	0	0	0	0	1	1	0	0	0	0	0	bisoprolol	NA	0	0	1	1358	1	972
1	86	22	0	0	1	0	0	0	1	0	1	0	0	1	NA	NA	0	0	1	178	1	178
1	86	7	0	0	1	0	1	1	1	0	0	0	1	0	carvedilol	NA	0	0	0	1956	0	1956
2	85	9	0	0	1	0	0	0	0	0	1	0	0	0	NA	NA	0	0	1	1715	1	1715
1	86	9	0	0	1	0	0	0	0	0	0	0	0	1	NA	NA	0	0	0	1852	0	1852
1	86	13	0	0	0	0	0	1	0	0	0	0	1	1	nebivolol	NA	0	0	1	331	1	331
1	93	8	0	0	0	0	0	1	0	0	0	0	0	0	nebivolol	NA	0	0	1	22	1	22
2	86	8	0	0	0	0	1	1	1	0	0	0	1	0	carvedilol	NA	0	0	0	1964	0	1964
2	86	3	0	0	1	0	0	1	1	0	0	0	0	0	carvedilol	NA	0	0	0	2018	0	2018
2	86	6	0	0	1	0	0	0	1	1	0	0	0	1	NA	NA	0	0	0	2046	1	731
2	85	7	0	0	0	1	0	0	0	1	0	0	1	0	NA	NA	0	0	0	2123	1	920
2	85	7	0	0	1	0	0	0	1	0	0	0	0	0	NA	NA	0	0	0	2124	1	244
2	86	8	0	0	1	0	0	0	1	1	0	0	1	1	NA	NA	0	0	1	1890	1	1890
2	93	2	0	0	1	0	0	0	0	1	1	0	0	0	NA	NA	0	0	1	506	1	482
2	93	9	0	0	1	0	1	1	0	0	0	0	0	0	carvedilol	NA	0	0	1	359	1	157
1	86	11	0	0	1	0	1	1	1	0	0	0	1	0	carvedilol	NA	0	0	1	122	1	122
2	86	4	0	1	1	0	0	0	1	0	0	0	0	0	NA	doxazosin	0	0	1	532	1	469
2	99	5	0	0	0	0	1	0	0	0	0	0	0	0	NA	NA	0	0	1	882	1	882
1	85	11	0	0	0	0	1	0	1	0	0	0	0	0	NA	NA	0	0	1	440	1	440
1	86	7	0	0	0	0	0	1	1	0	0	0	0	0	carvedilol	NA	0	0	1	361	1	15
2	85	8	0	0	0	0	1	0	0	0	0	0	0	0	NA	NA	0	0	1	1223	1	962
2	86	5	0	0	1	0	0	0	0	0	1	0	0	0	NA	NA	0	0	1	1617	1	1136
1	85	6	0	0	1	0	1	0	1	0	0	1	0	0	NA	NA	0	0	1	1759	1	1759
2	85	6	0	0	0	0	1	0	0	1	0	0	0	0	NA	NA	0	0	1	112	1	112
1	86	3	0	0	1	0	0	1	1	0	0	0	1	0	nebivolol	NA	0	0	1	380	1	380
1	85	8	0	0	0	0	0	1	0	1	1	0	0	0	carvedilol	NA	0	0	1	815	1	546
2	86	9	0	0	1	1	0	0	1	0	1	0	1	0	NA	NA	0	0	1	271	1	271
2	85	7	1	0	1	0	1	0	1	1	0	1	0	1	NA	NA	0	0	1	1031	1	1031
2	86	11	0	0	1	0	1	0	1	0	1	0	1	0	NA	NA	0	1	1	1400	1	1400
1	100	4	0	0	1	0	1	1	1	0	0	0	0	0	metoprolol	NA	0	0	1	44	1	44
2	85	9	0	0	1	0	1	1	1	0	1	0	1	0	carvedilol	NA	1	0	1	142	1	142
2	86	11	0	0	1	0	0	0	1	1	0	0	0	1	NA	NA	0	0	1	74	1	74
2	86	7	0	0	1	0	0	0	1	0	0	0	0	0	NA	NA	0	0	1	476	1	224
2	86	7	0	0	0	0	1	1	0	0	0	0	0	0	carvedilol	NA	0	0	0	1978	0	1978
2	92	7	0	0	0	0	0	1	0	0	0	0	0	0	carvedilol	NA	0	0	1	101	1	101
2	85	10	0	0	0	0	1	0	1	0	0	0	0	0	NA	NA	0	0	1	1269	1	1269
2	86	13	1	0	1	0	1	1	0	0	1	0	1	0	metoprolol	NA	0	0	1	1485	1	1485
2	86	8	0	0	1	0	1	1	1	1	0	1	0	0	carvedilol	NA	0	0	1	61	1	61
2	86	5	0	0	1	0	0	0	1	0	0	1	0	0	NA	NA	0	0	1	132	1	11
2	85	3	0	0	0	0	1	0	0	0	0	0	1	0	NA	NA	0	0	1	427	1	427
2	85	5	0	0	1	0	0	0	1	0	0	0	1	0	NA	NA	0	0	1	205	1	205
2	86	7	0	0	1	0	0	0	0	0	0	0	0	0	NA	NA	0	0	1	877	1	872
2	86	7	0	0	0	0	0	1	0	1	0	0	0	0	carvedilol	NA	0	0	1	928	1	853
1	86	3	0	0	0	0	1	0	0	0	0	0	0	0	NA	NA	0	0	1	1363	1	1363
1	85	7	1	0	1	0	0	1	1	0	0	0	0	0	carvedilol	NA	0	0	1	1726	1	1726
2	86	7	0	0	0	1	1	1	0	0	0	0	1	0	carvedilol	NA	0	0	0	1926	0	1926
1	86	7	1	0	1	0	1	1	1	0	0	0	1	0	carvedilol	NA	0	1	1	87	1	87
1	85	12	1	0	1	0	1	0	1	1	0	0	0	0	NA	NA	0	0	1	934	1	102
2	85	10	0	0	1	0	1	1	1	0	0	0	0	0	nebivolol	NA	0	0	1	192	1	192
1	86	6	0	0	1	0	0	0	1	0	1	0	1	1	NA	NA	0	0	1	1583	1	1150
2	86	6	0	0	1	0	0	0	1	0	1	0	0	0	NA	NA	0	0	0	1928	0	1928
1	85	7	0	1	0	1	1	1	1	0	0	0	0	1	nebivolol	doxazosin	0	0	1	573	1	514
1	85	2	1	0	0	0	1	0	1	0	0	0	1	0	NA	NA	0	0	1	203	1	203
2	93	12	0	0	1	0	0	1	1	0	0	0	0	0	nebivolol	NA	0	0	1	651	1	651
2	86	22	0	0	0	0	0	1	0	0	1	0	1	1	carvedilol	NA	0	0	1	640	1	619
2	93	12	0	0	0	0	1	0	0	0	0	0	0	0	NA	NA	0	0	1	549	1	549
2	86	3	0	0	0	0	0	1	1	0	0	0	0	0	metoprolol	NA	0	0	1	696	1	696
2	86	5	0	0	0	0	0	1	0	0	0	0	0	0	carvedilol	NA	0	0	0	2004	1	519
2	86	9	0	0	0	0	0	1	0	0	0	0	0	0	metoprolol	NA	0	0	1	1577	1	1577
2	86	11	0	0	1	0	0	0	1	0	0	1	0	0	NA	NA	0	0	0	1891	0	1891
2	86	6	0	0	1	0	0	1	0	0	0	0	0	0	nebivolol	NA	0	0	1	4	1	4
1	86	6	0	0	0	0	1	0	0	0	0	0	0	0	NA	NA	0	0	1	153	1	153
1	85	6	0	0	1	0	0	0	0	0	0	0	0	0	NA	NA	0	0	0	2102	0	2102
2	86	5	0	0	1	0	0	0	0	0	0	0	1	0	NA	NA	0	0	1	1520	1	1520
2	86	6	0	0	1	0	0	0	0	0	0	0	1	0	NA	NA	0	0	1	1486	1	1486
2	85	14	0	0	0	0	0	1	1	0	0	0	0	0	carvedilol	NA	0	0	1	570	1	559
2	85	4	0	0	0	0	1	1	1	1	0	0	0	1	metoprolol	NA	0	0	1	32	1	32
2	86	3	0	0	1	0	1	0	0	0	0	0	0	0	NA	NA	0	0	1	1203	1	1203
2	86	7	0	0	1	0	0	1	1	0	1	0	0	0	other	NA	0	0	0	2035	1	950
2	86	22	0	0	1	0	0	0	0	0	0	0	1	1	NA	NA	0	0	1	1839	1	1839
1	86	6	0	0	0	0	0	1	0	0	0	0	0	0	nebivolol	NA	0	0	1	936	1	936
2	86	9	0	0	0	0	1	1	0	0	0	0	1	0	carvedilol	NA	0	1	1	58	1	58
1	86	6	0	0	1	0	0	0	0	0	0	0	0	0	NA	NA	0	0	1	1548	1	1548
1	85	3	0	0	1	0	0	0	0	0	0	0	1	0	NA	NA	0	0	0	2137	1	85
2	85	9	0	0	1	0	0	0	1	0	0	0	1	0	NA	NA	0	0	1	604	1	604
2	86	9	0	0	1	0	1	1	1	0	0	0	0	0	metoprolol	NA	0	0	1	304	1	304
2	85	6	0	0	0	0	1	0	1	0	0	0	0	1	NA	NA	0	0	0	2131	0	2131
2	86	7	0	0	0	0	1	1	1	0	0	0	0	0	carvedilol	NA	0	0	1	237	1	237
2	93	8	0	0	1	0	0	1	0	0	0	0	1	0	carvedilol	NA	0	0	1	108	1	108
1	85	7	0	0	0	0	1	0	1	0	0	0	1	0	NA	NA	1	0	1	45	1	45
2	93	12	0	0	1	0	0	0	1	0	0	0	0	0	NA	NA	0	0	1	463	1	447
1	86	5	0	1	0	0	1	0	0	0	0	0	0	0	NA	doxazosin	0	0	1	662	1	229
2	93	21	0	0	1	0	1	0	0	0	0	0	0	0	NA	NA	0	1	1	1134	1	1134
2	86	11	0	0	1	0	0	0	1	1	0	0	0	1	NA	NA	0	0	1	643	1	639
1	85	12	0	0	0	0	1	1	1	1	0	1	0	0	carvedilol	NA	0	0	1	1342	1	1342
2	85	7	0	0	1	0	1	0	1	0	0	0	1	0	NA	NA	0	0	1	1254	1	1247
2	85	9	0	0	0	1	0	0	1	0	1	0	1	0	NA	NA	0	0	1	319	1	319
1	86	5	0	0	1	0	0	0	1	1	0	0	1	0	NA	NA	0	1	1	1050	1	1050
2	86	14	0	0	1	0	0	0	1	0	1	0	0	1	NA	NA	0	0	1	339	1	339
2	85	5	0	0	1	0	0	1	1	0	1	1	0	0	other	NA	0	0	0	2140	0	2140
2	85	6	0	0	1	1	1	0	0	0	0	0	1	0	NA	NA	0	1	1	1323	1	1323
2	86	8	0	0	1	0	1	1	1	1	0	0	1	0	carvedilol	NA	0	1	0	1859	0	1859
1	86	6	0	0	1	0	0	1	1	0	0	0	0	0	carvedilol	NA	0	0	1	365	1	364
2	86	14	0	0	0	0	1	0	0	0	0	0	1	0	NA	NA	0	0	1	2003	1	2000
2	86	5	0	0	1	0	0	1	0	0	0	0	0	0	carvedilol	NA	0	0	1	208	1	205
2	85	5	0	0	1	0	0	0	1	0	1	0	0	0	NA	NA	0	0	0	2077	0	2077
2	86	8	0	0	0	0	1	1	0	1	0	0	0	0	carvedilol	NA	0	0	1	106	1	106
1	85	9	0	0	0	0	0	1	0	0	0	0	0	0	carvedilol	NA	0	0	1	117	1	101
2	86	16	0	0	0	0	1	0	1	0	0	0	0	0	NA	NA	0	0	1	78	1	78
2	85	12	0	0	1	0	0	0	1	0	0	0	1	0	NA	NA	0	0	0	2089	0	2089
2	86	13	0	0	1	0	0	1	1	0	0	0	0	0	carvedilol	NA	0	0	1	67	1	67
2	85	2	0	0	1	0	1	0	1	0	0	0	0	0	NA	NA	0	0	1	2	1	2
2	86	7	0	0	1	0	1	0	1	0	0	0	0	1	NA	NA	0	0	1	801	1	801
2	93	14	0	0	1	0	1	0	1	0	0	0	1	0	NA	NA	0	1	1	1166	1	1166
2	85	5	0	0	0	0	1	0	1	0	0	1	0	0	NA	NA	0	0	1	1689	1	1689
2	86	2	0	0	0	1	1	0	0	0	1	0	1	0	NA	NA	0	0	0	1822	1	951
2	85	6	0	0	0	0	0	1	1	0	1	0	1	1	metoprolol	NA	0	1	0	2102	1	1723
1	86	11	0	0	0	0	0	1	1	0	0	1	0	0	metoprolol	NA	0	0	1	1307	1	596
1	85	5	0	0	0	0	0	1	0	0	0	0	0	0	carvedilol	NA	0	0	1	1285	1	1284
1	86	9	0	1	1	0	0	1	0	0	0	0	0	0	carvedilol	doxazosin	0	0	1	816	1	666
1	86	5	0	0	1	0	0	1	0	0	0	1	1	0	carvedilol	NA	0	0	0	1879	0	1879
2	85	21	0	0	0	0	0	1	0	0	0	0	0	0	carvedilol	NA	0	1	1	829	1	829
1	86	3	0	0	0	0	1	0	1	0	0	1	1	0	NA	NA	0	0	1	1171	1	1171
2	85	10	0	0	1	0	0	1	1	0	0	0	0	0	carvedilol	NA	0	0	1	385	1	385
1	86	7	0	0	0	1	0	0	1	0	0	1	0	0	NA	NA	0	1	1	474	1	474
1	86	7	0	0	0	0	0	1	1	0	0	0	0	1	carvedilol	NA	0	0	0	1828	0	1828
2	85	4	0	0	1	0	0	0	1	0	0	0	0	0	NA	NA	0	0	1	173	1	173
1	86	7	0	0	0	0	0	1	1	0	1	0	0	0	carvedilol	NA	0	0	0	1858	0	1858
2	86	15	0	0	0	0	0	1	1	0	0	0	1	1	metoprolol	NA	0	0	1	57	1	57
2	86	3	0	0	0	0	1	1	1	0	0	1	0	0	carvedilol	NA	0	0	1	328	1	259
2	85	14	0	0	1	0	0	1	1	0	0	0	0	0	carvedilol	NA	0	0	1	1159	1	696
1	86	5	0	0	1	0	1	0	1	0	1	0	0	0	NA	NA	0	0	1	1873	1	1873
2	85	13	0	0	0	0	1	0	0	0	0	0	0	0	NA	NA	0	0	0	2035	0	2035
2	86	8	0	0	1	0	1	1	1	0	0	1	0	0	carvedilol	NA	0	0	0	1985	0	1985
2	86	4	0	0	1	0	1	0	1	0	0	1	0	1	NA	NA	0	0	1	1138	1	1103
2	86	12	1	0	1	0	0	0	1	1	1	0	1	1	NA	NA	0	0	1	156	1	156
2	86	8	0	0	0	1	1	0	0	0	1	0	0	0	NA	NA	0	0	1	1386	1	1386
1	85	9	0	0	0	0	1	0	1	0	0	0	0	0	NA	NA	0	0	1	153	1	89
2	86	4	0	0	1	0	0	1	1	0	0	0	0	0	metoprolol	NA	0	0	1	1537	1	1537
1	86	5	0	0	1	0	1	0	1	0	0	0	1	0	NA	NA	0	0	1	1043	1	1043
2	86	12	0	0	1	0	0	0	0	0	0	0	0	0	NA	NA	0	0	0	1894	0	1894
2	85	5	0	0	1	0	0	0	1	0	0	1	0	0	NA	NA	0	0	1	2009	1	2009
2	85	8	0	0	1	0	1	0	0	0	0	0	0	1	NA	NA	0	0	1	167	1	163
2	85	9	0	0	1	0	0	0	0	0	0	0	0	0	NA	NA	0	0	0	2138	1	1277
2	86	8	0	0	1	0	0	0	0	0	0	0	1	1	NA	NA	0	0	1	4	1	4
2	86	5	0	0	1	0	0	0	0	0	0	0	0	1	NA	NA	0	0	1	1284	1	102
1	85	11	0	0	0	0	1	1	0	1	0	1	0	0	carvedilol	NA	0	0	1	39	1	39
1	85	18	0	0	0	0	1	1	0	1	0	0	1	0	carvedilol	NA	0	1	1	591	1	591
1	86	7	0	0	1	0	1	1	1	0	0	0	0	1	carvedilol	NA	0	0	1	5	1	5
1	86	6	0	0	0	1	0	0	1	0	0	0	1	0	NA	NA	0	0	0	1907	0	1907
2	85	7	0	0	1	0	0	0	1	0	0	0	0	1	NA	NA	0	0	1	546	1	90
2	85	11	0	0	1	0	0	0	1	0	0	0	1	1	NA	NA	0	0	1	227	1	227
2	85	19	1	0	1	0	0	0	1	0	1	0	1	0	NA	NA	0	0	0	2035	0	2035
2	86	11	0	0	0	1	1	1	0	1	0	0	0	0	carvedilol	NA	0	0	1	1656	1	1656
2	85	4	0	0	0	0	0	1	0	0	0	0	0	0	carvedilol	NA	0	1	1	405	1	3
2	86	7	0	0	0	0	0	1	1	0	0	0	0	0	carvedilol	NA	0	1	1	764	1	764
1	86	11	0	0	1	0	0	0	1	0	0	1	1	1	NA	NA	0	0	1	1143	1	1143
2	86	4	0	0	1	0	0	0	0	0	1	1	1	1	NA	NA	0	0	0	1851	0	1851
2	85	6	0	0	1	0	0	0	1	0	0	0	0	0	NA	NA	0	0	1	1228	1	1118
2	86	13	0	0	1	0	1	0	0	1	0	1	1	0	NA	NA	0	0	1	287	1	287
2	86	7	0	0	0	0	1	1	0	1	0	0	1	0	nebivolol	NA	0	0	1	170	1	170
2	86	6	0	0	0	0	1	1	1	0	1	0	1	0	carvedilol	NA	0	0	1	1656	1	1656
1	85	7	0	0	0	0	0	1	1	0	0	0	0	0	carvedilol	NA	0	0	1	1441	1	1441
1	86	6	0	0	0	0	1	1	1	0	0	0	1	1	nebivolol	NA	0	1	1	386	1	386
1	86	10	0	0	1	0	0	0	0	0	0	1	1	0	NA	NA	1	0	1	8	1	8
2	93	9	0	0	1	0	0	0	0	1	0	0	0	1	NA	NA	0	0	1	275	1	275
2	86	25	0	0	1	0	0	1	1	1	0	0	0	0	carvedilol	NA	0	0	1	205	1	194
2	85	7	0	0	0	1	1	0	0	0	0	0	0	0	NA	NA	0	1	1	20	1	20
2	93	6	0	0	1	0	1	1	0	0	0	0	0	0	carvedilol	NA	0	0	1	150	1	150
2	86	20	0	0	1	0	1	0	1	0	1	0	1	0	NA	NA	0	1	1	2	1	2
2	86	3	0	0	1	0	1	1	1	0	1	0	1	0	nebivolol	NA	0	0	0	1821	0	1821
1	86	5	0	0	1	0	0	0	0	1	0	0	0	0	NA	NA	0	0	0	1972	0	1972
2	85	8	0	0	0	0	0	1	1	0	0	0	1	0	carvedilol	NA	1	0	1	137	1	137
2	86	9	0	0	1	0	0	1	1	0	0	0	0	0	nebivolol	NA	0	1	1	1095	1	1095
1	86	4	0	0	0	0	1	1	1	0	0	0	0	0	carvedilol	NA	0	0	0	1828	0	1828
2	86	19	0	0	1	0	1	0	0	1	0	0	0	0	NA	NA	0	0	1	883	1	883
2	93	3	0	0	0	0	0	1	1	0	0	0	0	0	carvedilol	NA	0	0	1	213	1	213
2	85	15	0	0	1	0	0	0	1	0	1	1	1	1	NA	NA	0	0	1	450	1	450
2	85	9	0	0	0	0	0	1	1	0	0	0	0	0	carvedilol	NA	0	0	0	2062	0	2062
2	86	8	0	0	0	1	0	1	1	0	0	0	1	1	nebivolol	NA	0	0	1	1479	1	1479
2	93	3	0	0	1	0	0	1	0	0	1	0	0	0	carvedilol	NA	0	0	1	590	1	590
2	86	10	1	0	1	0	0	0	1	0	0	1	0	0	NA	NA	0	1	1	471	1	471
2	86	5	0	0	1	0	0	1	0	0	0	0	0	0	carvedilol	NA	0	0	0	1991	0	1991
2	86	6	0	0	1	0	0	0	1	0	1	0	0	1	NA	NA	0	0	1	198	1	198
2	85	4	0	0	0	0	1	1	1	0	0	0	0	0	carvedilol	NA	0	0	1	1801	1	1801
2	86	2	0	0	1	0	0	0	0	0	0	0	0	0	NA	NA	0	0	0	1877	0	1877
2	86	5	0	0	0	0	1	0	0	1	0	0	1	1	NA	NA	0	1	1	247	1	247
2	85	4	0	0	1	0	0	0	1	0	1	0	0	0	NA	NA	0	0	1	1176	1	526
2	86	8	0	0	1	0	0	1	1	1	0	0	0	1	other	NA	0	1	0	1884	0	1884
2	85	5	0	0	1	0	0	1	1	0	1	0	1	0	carvedilol	NA	0	0	0	2076	0	2076
2	85	5	0	0	0	1	0	0	1	0	1	0	1	1	NA	NA	0	1	1	845	1	845
2	86	3	1	0	1	0	1	0	0	0	0	0	0	0	NA	NA	0	0	1	1420	1	1420
2	85	5	0	0	1	0	0	1	1	0	0	0	1	1	carvedilol	NA	0	0	1	512	1	450
2	85	7	0	0	1	0	0	0	0	0	0	0	0	0	NA	NA	0	0	1	345	1	36
2	86	5	0	0	0	0	1	1	0	0	0	0	0	1	carvedilol	NA	0	0	1	827	1	88
2	86	7	0	0	1	0	0	1	0	0	0	0	0	0	carvedilol	NA	0	0	1	943	1	943
2	86	7	1	0	0	1	0	0	0	0	0	0	1	0	NA	NA	0	1	0	1955	0	1955
2	86	6	0	0	1	0	0	0	0	0	0	0	1	0	NA	NA	0	0	1	1262	1	181
1	86	6	0	0	1	0	1	1	1	0	0	0	0	0	carvedilol	NA	0	0	0	1804	0	1804
1	85	7	0	0	1	0	0	1	0	0	0	0	0	0	carvedilol	NA	0	0	0	2108	0	2108
1	86	14	0	0	1	0	0	0	0	0	0	0	1	0	NA	NA	0	0	1	8	1	8
2	85	5	0	0	0	0	1	1	1	1	0	0	0	0	carvedilol	NA	0	0	1	1314	1	384
1	93	23	0	0	1	0	0	0	0	1	0	0	0	0	NA	NA	0	0	1	230	1	230
2	85	7	0	0	1	0	0	1	1	1	1	0	1	0	other	NA	0	0	1	1921	1	1921
2	85	15	0	0	1	0	1	0	1	0	1	0	0	0	NA	NA	0	0	0	2027	0	2027
2	86	17	0	0	1	0	1	0	0	0	0	0	0	0	NA	NA	0	0	1	1232	1	715
2	85	7	0	0	1	0	1	0	1	1	0	1	1	0	NA	NA	0	0	1	1819	1	1819
2	86	6	0	0	1	0	1	1	0	0	1	0	0	0	metoprolol	NA	0	0	1	1705	1	1705
1	85	5	0	0	1	0	1	1	1	0	0	0	1	1	carvedilol	NA	0	0	1	885	1	885
1	86	7	0	0	1	1	0	1	1	0	1	0	1	0	nebivolol	NA	0	0	1	579	1	579
2	86	3	0	0	1	1	0	1	1	0	0	1	0	1	carvedilol	NA	0	0	1	1131	1	1131
1	86	4	0	0	1	0	1	1	1	0	0	0	1	1	carvedilol	NA	0	0	1	30	1	30
2	86	6	0	0	1	0	0	0	0	0	0	0	0	0	NA	NA	0	0	1	1225	1	1225
2	85	7	0	0	1	0	0	0	0	0	0	0	1	1	NA	NA	0	0	1	704	1	688
1	86	7	0	0	1	0	0	1	1	0	1	0	1	0	carvedilol	NA	0	0	1	369	1	369
2	86	7	0	0	0	1	1	0	0	0	0	0	0	0	NA	NA	0	0	0	1979	0	1979
1	85	5	0	0	1	0	0	0	0	1	0	0	1	0	NA	NA	0	1	1	1451	1	209
2	85	4	0	0	1	0	1	0	1	0	0	0	1	1	NA	NA	0	1	1	1926	1	1926
1	86	3	0	0	1	1	0	0	1	0	1	0	0	1	NA	NA	0	0	1	953	1	953
2	86	9	0	0	0	0	1	1	1	0	1	1	0	1	carvedilol	NA	0	0	1	451	1	451
1	86	5	0	0	1	0	0	0	1	0	1	0	0	0	NA	NA	0	1	1	1000	1	1000
2	86	4	0	0	0	0	1	0	0	0	0	0	0	0	NA	NA	0	0	0	1943	0	1943
1	85	3	0	0	1	0	0	0	0	0	1	0	1	0	NA	NA	0	0	0	2074	1	884
2	85	4	0	0	0	0	0	1	0	0	0	0	1	0	metoprolol	NA	0	0	1	818	1	818
1	85	0	0	0	0	1	0	0	1	0	0	0	1	0	NA	NA	0	1	1	958	1	914
1	93	4	0	0	1	0	0	1	1	0	0	0	1	0	nebivolol	NA	0	0	1	1211	1	1004
2	93	8	0	0	0	0	1	0	0	1	1	0	0	0	NA	NA	0	0	1	1291	1	1291
1	85	7	0	0	0	0	0	1	1	0	0	1	1	0	metoprolol	NA	0	1	0	2045	1	49
1	86	3	0	0	1	0	1	0	1	0	0	0	1	0	NA	NA	0	0	0	1969	0	1969
2	86	12	0	0	1	0	0	0	0	0	0	0	0	0	NA	NA	0	0	1	267	1	267
2	92	7	0	0	1	0	1	0	0	1	0	0	0	0	NA	NA	0	0	1	79	1	79
2	85	7	1	0	0	0	0	1	1	0	0	0	0	1	carvedilol	NA	0	1	1	44	1	44
2	85	6	0	0	1	0	1	0	1	1	0	0	0	1	NA	NA	0	0	0	2138	0	2138
1	85	5	1	0	1	1	0	0	1	0	0	1	1	0	NA	NA	0	0	1	1362	1	1362
1	85	14	0	0	1	0	1	0	0	1	0	0	0	0	NA	NA	0	0	0	2062	0	2062
2	85	29	1	0	0	0	1	1	1	0	0	0	1	1	other	NA	0	0	1	609	1	609
2	86	7	0	0	1	0	1	0	0	0	1	0	0	0	NA	NA	0	0	1	761	1	761
2	86	13	0	0	1	0	1	1	1	1	0	0	1	0	bisoprolol	NA	0	0	1	1640	1	1640
1	85	8	0	0	1	0	1	0	0	0	0	0	1	0	NA	NA	0	0	0	2014	0	2014
1	85	6	0	0	1	0	0	0	0	1	1	0	0	0	NA	NA	0	0	1	753	1	36
2	86	5	0	0	1	0	1	0	1	1	0	0	1	0	NA	NA	0	0	1	1295	1	1295
1	92	6	0	1	0	0	0	1	1	1	0	0	0	0	carvedilol	doxazosin	0	0	1	353	1	353
1	85	6	0	0	1	0	1	0	1	0	0	1	0	1	NA	NA	0	0	1	67	1	67
1	93	3	0	0	0	1	0	0	1	1	0	0	1	0	NA	NA	0	0	0	2068	0	2068
1	85	15	0	0	0	0	0	1	0	0	0	0	0	1	nebivolol	NA	0	0	1	722	1	722
2	85	8	0	0	1	0	0	0	1	0	0	0	0	0	NA	NA	0	1	1	1324	1	1322
2	85	2	0	0	1	0	0	0	0	0	0	0	0	0	NA	NA	0	0	0	2082	0	2082
2	86	7	0	0	1	0	1	1	1	0	0	0	1	0	carvedilol	NA	0	0	1	344	1	344
2	85	5	0	0	0	0	0	1	0	0	0	0	0	0	carvedilol	NA	0	0	0	2118	0	2118
2	86	7	0	0	1	0	0	0	0	0	0	0	0	1	NA	NA	0	0	0	1900	0	1900
1	86	5	0	0	1	0	1	0	0	0	0	0	1	0	NA	NA	0	0	1	98	1	98
2	85	4	0	0	1	0	0	0	0	0	1	0	0	0	NA	NA	0	0	0	2018	0	2018
2	86	8	0	0	0	0	0	1	1	1	0	1	0	1	nebivolol	NA	0	0	1	1080	1	1072
2	85	10	0	0	0	0	1	1	0	0	0	0	0	0	nebivolol	NA	0	0	1	1029	1	544
2	86	6	0	0	1	0	0	0	0	0	0	0	0	0	NA	NA	0	0	1	405	1	34
2	86	7	0	0	1	0	0	1	1	0	1	0	0	1	nebivolol	NA	0	0	1	1465	1	1465
1	86	3	0	0	1	0	0	0	1	0	0	0	1	0	NA	NA	0	0	1	1871	1	1828
2	86	7	0	0	1	0	0	0	0	0	0	0	0	0	NA	NA	0	0	0	1842	0	1842
2	86	4	0	0	0	0	0	1	1	0	1	0	1	0	metoprolol	NA	0	1	1	876	1	876
1	85	9	0	0	1	0	1	0	1	0	1	0	0	0	NA	NA	0	0	1	65	1	65
1	86	7	0	0	0	1	0	0	1	0	0	1	0	0	NA	NA	0	0	1	889	1	882
2	92	5	0	0	1	0	0	1	0	0	0	0	0	0	carvedilol	NA	0	0	1	161	1	161
1	85	4	0	0	1	0	1	0	0	0	1	0	0	0	NA	NA	0	0	0	2046	0	2046
2	86	10	0	0	1	0	0	1	0	0	0	0	0	0	carvedilol	NA	0	1	1	811	1	811
2	85	7	0	0	0	1	1	0	0	1	0	0	0	1	NA	NA	0	0	0	2061	0	2061
2	85	2	0	0	0	0	1	0	1	0	0	0	0	0	NA	NA	0	0	1	282	1	282
2	85	7	0	0	1	0	1	0	1	1	0	1	0	0	NA	NA	0	0	1	771	1	771
1	86	7	0	0	0	1	0	0	0	1	0	0	0	0	NA	NA	0	0	1	1275	1	1275
1	85	5	0	0	0	0	1	0	1	1	0	0	0	0	NA	NA	0	0	1	92	1	92
2	86	7	0	0	0	0	0	1	1	0	0	0	0	0	carvedilol	NA	0	0	1	575	1	542
2	85	10	0	0	0	0	1	1	1	0	0	0	1	0	carvedilol	NA	0	0	1	48	1	48
2	85	5	0	0	0	0	1	1	1	0	0	0	0	0	carvedilol	NA	0	1	1	766	1	766
1	86	9	0	0	0	0	1	0	1	0	0	0	0	1	NA	NA	0	0	1	96	1	96
2	86	14	0	0	1	0	1	0	1	0	1	1	1	0	NA	NA	0	1	0	1983	0	1983
1	86	7	0	0	1	0	0	0	1	1	0	0	0	1	NA	NA	0	0	1	665	1	665
2	86	8	0	0	1	0	1	0	0	0	1	0	1	0	NA	NA	0	0	0	1846	0	1846
1	85	3	0	0	0	1	1	1	1	0	0	0	0	0	carvedilol	NA	0	0	0	2102	0	2102
2	85	7	0	0	1	0	0	1	0	0	0	0	1	1	nebivolol	NA	0	0	1	742	1	479
1	86	11	0	0	1	0	0	0	1	0	0	0	1	0	NA	NA	0	1	1	528	1	528
1	86	12	0	0	0	0	1	0	1	0	0	1	0	0	NA	NA	0	0	1	69	1	69
2	86	8	0	0	0	1	1	1	1	0	0	0	0	1	metoprolol	NA	0	0	1	1222	1	1222
2	86	5	0	0	1	0	1	0	1	0	1	0	1	1	NA	NA	1	0	1	1739	1	1739
1	85	12	0	0	0	0	1	1	1	0	0	0	1	0	carvedilol	NA	0	0	1	477	1	477
2	86	7	0	0	0	0	1	0	1	1	0	0	0	0	NA	NA	0	0	1	896	1	880
2	86	12	0	0	1	0	0	0	1	0	0	0	0	0	NA	NA	0	0	1	505	1	491
1	85	17	0	0	0	0	0	1	1	0	0	0	1	1	carvedilol	NA	0	0	1	246	1	246
2	93	9	0	0	1	0	0	0	0	0	0	0	0	0	NA	NA	0	0	1	23	1	23
2	86	4	0	0	1	0	0	1	1	1	0	1	0	1	carvedilol	NA	0	0	0	1842	0	1842
2	85	6	0	0	1	0	0	1	1	0	0	0	1	0	nebivolol	NA	0	0	1	95	1	94
2	85	3	0	0	0	1	1	1	1	1	0	0	1	0	nebivolol	NA	0	0	1	964	1	964
1	86	3	0	0	0	0	0	1	1	0	1	0	0	0	metoprolol	NA	0	1	1	22	1	22
2	93	6	0	0	1	1	0	0	1	0	1	0	0	0	NA	NA	0	0	1	506	1	506
1	85	6	0	1	0	0	1	0	0	0	1	1	0	0	NA	doxazosin	0	0	1	1962	1	1962
2	86	10	0	0	0	0	0	1	1	0	0	0	0	0	carvedilol	NA	0	0	1	72	1	59
2	85	6	0	0	1	0	1	1	1	0	0	1	0	0	carvedilol	NA	0	0	1	103	1	103
2	85	5	0	0	0	0	0	1	0	1	0	0	1	0	carvedilol	NA	0	0	1	563	1	556
2	85	3	0	0	1	0	0	1	1	1	0	1	0	1	other	NA	0	0	1	147	1	93
2	85	14	0	0	0	0	0	1	1	0	0	0	0	0	metoprolol	NA	0	0	0	2102	0	2102
2	86	5	0	0	1	0	1	0	0	0	0	0	1	0	NA	NA	0	0	0	1901	0	1901
2	93	24	0	0	0	0	0	1	1	1	0	0	0	0	nebivolol	NA	0	1	1	675	1	675
2	85	3	0	0	1	0	0	0	0	0	0	0	1	1	NA	NA	0	0	0	2122	0	2122
2	86	8	0	0	1	0	0	0	0	0	0	0	1	0	NA	NA	0	0	1	1460	1	1460
2	86	12	0	0	1	0	1	1	1	1	0	0	0	0	metoprolol	NA	0	0	1	886	1	234
2	86	5	0	0	0	0	1	0	0	0	0	0	0	0	NA	NA	0	0	1	100	1	100
1	86	11	0	0	1	0	0	1	0	0	0	0	0	0	nebivolol	NA	0	0	1	304	1	304
2	86	6	0	0	1	0	0	0	1	0	0	0	0	0	NA	NA	0	0	1	1647	1	632
2	86	21	0	0	1	0	0	0	0	0	1	0	0	1	NA	NA	0	0	1	25	1	25
2	93	11	0	0	0	0	1	0	1	1	0	0	0	0	NA	NA	0	0	1	94	1	94
1	85	4	0	0	1	0	0	0	1	0	0	0	0	1	NA	NA	0	0	1	122	1	122
2	86	11	0	0	1	0	1	1	0	0	0	0	1	0	metoprolol	NA	0	0	1	1036	1	1036
1	85	7	0	0	1	0	1	1	1	0	0	0	0	0	bisoprolol	NA	0	0	1	1704	1	1702
2	86	8	0	0	0	0	0	1	0	0	1	0	0	1	nebivolol	NA	0	0	1	651	1	651
2	85	5	0	0	1	0	0	0	0	0	0	0	0	0	NA	NA	0	0	1	2012	1	964
2	85	9	0	0	0	0	1	0	0	0	0	0	1	1	NA	NA	0	0	1	24	1	24
2	85	8	0	0	1	0	0	0	0	0	0	0	0	1	NA	NA	0	0	1	204	1	204
1	85	8	0	0	1	0	1	1	1	0	0	0	0	0	carvedilol	NA	0	0	0	2096	1	971
2	86	17	0	0	1	0	0	1	1	0	1	0	1	0	other	NA	0	0	1	446	1	446
1	86	8	0	0	1	0	0	0	0	0	0	0	0	0	NA	NA	0	1	1	643	1	215
1	86	5	0	0	0	0	0	1	1	0	1	0	0	1	nebivolol	NA	0	0	1	699	1	671
1	85	6	0	0	1	0	1	0	1	0	0	0	0	1	NA	NA	0	1	1	2026	1	2026
1	86	9	0	0	1	0	0	0	1	1	0	0	0	0	NA	NA	0	0	1	700	1	21
2	86	6	0	0	1	0	0	1	0	0	0	0	0	0	carvedilol	NA	0	0	1	1317	1	235
2	86	2	0	0	0	0	0	1	1	0	0	0	0	0	carvedilol	NA	0	0	1	565	1	565
2	85	7	0	0	1	0	1	0	1	1	0	0	0	0	NA	NA	0	0	1	604	1	506
2	85	6	0	0	1	0	1	1	1	0	0	0	0	1	nebivolol	NA	0	0	1	264	1	264
1	85	17	0	0	1	0	1	0	1	0	0	0	1	0	NA	NA	0	0	1	1743	1	1743
2	93	5	0	0	1	0	0	1	1	1	0	0	1	0	carvedilol	NA	0	0	1	66	1	66
2	85	3	0	0	1	0	1	0	0	0	1	0	0	0	NA	NA	0	0	1	219	1	219
2	86	11	0	1	0	1	1	0	1	0	1	0	1	0	NA	doxazosin	0	0	0	1961	0	1961
2	85	15	0	0	0	1	0	0	1	0	0	0	1	0	NA	NA	0	0	1	922	1	904
2	93	11	0	0	1	0	1	0	1	0	0	0	1	0	NA	NA	0	0	1	1023	1	295
2	85	13	0	0	0	0	1	0	1	0	0	0	0	0	NA	NA	0	0	0	2090	1	673
2	85	4	0	0	1	0	1	0	1	1	0	0	0	0	NA	NA	0	0	1	1963	1	1272
1	86	10	0	0	1	0	0	0	0	0	0	0	0	0	NA	NA	0	0	1	1158	1	417
1	85	8	0	0	0	0	0	1	1	0	0	0	0	0	metoprolol	NA	0	0	1	1580	1	1580
2	85	7	0	0	1	0	1	0	1	0	0	0	0	0	NA	NA	0	0	1	76	1	76
2	85	2	0	0	1	0	1	0	0	0	0	0	1	0	NA	NA	0	0	1	308	1	308
2	85	4	0	0	0	0	1	0	0	0	0	0	1	0	NA	NA	0	0	0	2101	0	2101
2	86	4	0	0	1	0	0	1	0	0	0	0	0	0	carvedilol	NA	0	0	1	458	1	458
1	85	4	0	0	1	0	0	1	1	0	0	0	1	0	carvedilol	NA	0	0	1	1777	1	1777
2	85	12	0	0	0	0	1	1	1	0	0	1	0	0	carvedilol	NA	0	1	1	300	1	48
2	85	10	0	0	1	0	0	0	0	0	0	0	1	0	NA	NA	0	1	1	175	1	175
1	85	5	0	0	1	0	0	0	1	0	0	0	0	0	NA	NA	0	0	0	2152	0	2152
2	86	4	0	0	1	0	1	0	1	0	1	0	1	1	NA	NA	0	0	1	1610	1	1610
2	85	5	0	0	0	0	0	1	1	0	0	0	0	0	metoprolol	NA	0	0	0	2132	0	2132
2	85	15	0	0	1	0	0	1	1	0	0	0	0	1	carvedilol	NA	0	0	1	90	1	90
1	85	12	0	0	1	0	1	1	0	0	1	0	0	0	carvedilol	NA	0	0	1	816	1	816
1	86	2	0	0	1	0	0	0	0	0	0	0	1	0	NA	NA	0	0	1	105	1	96
2	86	7	0	0	1	0	0	0	0	0	0	0	1	0	NA	NA	0	0	0	1864	0	1864
2	85	8	1	0	1	0	1	1	1	1	0	0	1	1	carvedilol	NA	1	1	0	2033	1	514
2	86	3	0	0	0	1	0	0	1	0	1	0	1	1	NA	NA	0	0	0	1794	0	1794
1	93	7	0	0	1	0	1	1	1	0	0	0	0	0	carvedilol	NA	0	0	1	233	1	233
1	93	15	0	0	1	0	0	0	1	0	0	0	0	0	NA	NA	0	0	1	508	1	477
2	85	4	0	0	1	0	0	0	0	0	0	0	0	0	NA	NA	0	0	0	2115	1	269
2	86	12	0	0	0	0	0	1	1	0	0	0	0	0	carvedilol	NA	0	0	1	807	1	807
2	85	5	0	0	0	0	1	1	1	0	0	0	1	0	carvedilol	NA	0	0	1	1507	1	1507
2	85	5	0	0	0	0	0	1	0	0	0	0	0	0	carvedilol	NA	0	0	0	2016	0	2016
2	85	8	0	0	1	0	1	0	0	1	0	0	0	0	NA	NA	0	0	1	341	1	295
2	86	7	0	0	1	0	0	0	1	0	1	0	1	0	NA	NA	0	0	0	1835	0	1835
2	85	11	0	0	1	0	0	0	1	0	0	0	1	0	NA	NA	0	1	0	2010	1	631
2	86	5	0	0	0	1	0	0	1	0	0	1	0	0	NA	NA	0	0	1	758	1	758
2	85	6	0	0	0	0	1	0	1	0	0	1	0	0	NA	NA	0	0	1	334	1	334
1	86	5	0	0	1	0	1	0	0	0	0	0	1	0	NA	NA	0	0	0	1817	0	1817
1	85	7	0	0	1	0	0	0	0	0	0	0	1	0	NA	NA	0	0	1	1249	1	1241
2	85	4	0	0	1	0	1	0	1	0	0	0	1	1	NA	NA	0	0	1	696	1	122
2	86	4	0	0	1	0	0	0	0	0	0	0	1	0	NA	NA	0	0	1	1491	1	1491
2	85	6	0	0	1	0	1	1	1	1	0	0	1	1	metoprolol	NA	0	0	0	2116	0	2116
1	86	12	0	0	1	0	1	1	1	0	0	1	0	0	carvedilol	NA	0	0	1	993	1	993
1	86	9	0	0	1	0	0	0	1	0	0	0	1	0	NA	NA	0	0	0	1891	0	1891
1	85	4	1	0	0	0	1	1	1	0	0	0	0	0	nebivolol	NA	0	1	1	1625	1	283
2	85	6	0	0	1	1	0	0	1	0	0	1	1	0	NA	NA	0	0	1	432	1	432
1	86	12	0	0	0	1	0	1	1	0	1	0	0	1	carvedilol	NA	0	0	1	200	1	200
2	85	7	0	0	1	0	0	0	0	0	0	0	0	0	NA	NA	0	0	1	639	1	639
2	85	6	0	1	1	0	0	0	0	1	1	0	0	0	NA	doxazosin	0	0	1	755	1	755
2	86	13	0	0	1	0	0	0	1	0	0	0	1	1	NA	NA	0	0	1	382	1	382
2	85	11	0	0	1	0	0	1	1	0	0	0	1	0	nebivolol	NA	0	0	0	2009	1	1109
1	86	7	0	0	0	0	1	0	0	0	0	0	1	1	NA	NA	0	1	1	68	1	68
2	86	5	0	0	1	0	0	0	1	0	0	0	1	0	NA	NA	1	0	1	1408	1	1408
2	86	6	0	0	0	0	0	1	0	0	0	0	0	0	carvedilol	NA	0	0	1	1776	1	1776
2	85	11	0	0	1	1	1	0	1	0	1	1	1	0	NA	NA	0	0	1	2101	1	2101
2	86	8	0	0	0	1	1	1	1	0	0	1	0	0	nebivolol	NA	0	0	1	16	1	16
2	85	7	0	0	0	0	1	1	0	0	0	0	0	0	carvedilol	NA	0	0	1	48	1	44
2	86	7	0	0	1	0	1	0	0	0	0	0	1	0	NA	NA	1	0	1	24	1	24
2	93	16	0	0	1	0	0	0	1	0	0	0	0	0	NA	NA	0	1	1	1475	1	1475
2	85	8	0	0	1	0	0	1	0	0	1	1	0	0	metoprolol	NA	0	1	1	452	1	388
1	92	4	0	0	1	0	0	1	0	1	0	0	0	1	carvedilol	NA	0	0	1	606	1	606
2	85	7	0	0	1	0	0	1	1	0	0	0	0	1	nebivolol	NA	0	0	1	267	1	267
1	86	5	0	0	1	0	0	1	1	0	0	1	1	0	other	NA	0	0	1	1524	1	671
2	86	7	0	0	0	0	1	1	1	0	1	0	0	1	carvedilol	NA	0	1	1	351	1	351
2	85	10	0	0	1	0	1	1	1	0	0	0	1	0	nebivolol	NA	0	0	1	135	1	135
1	85	10	0	0	0	0	0	1	0	0	0	0	1	0	nebivolol	NA	1	0	1	915	1	915
2	86	7	0	0	1	0	0	1	1	0	0	0	1	0	carvedilol	NA	1	0	1	466	1	445
2	86	7	0	0	1	0	0	1	0	0	0	0	1	1	metoprolol	NA	0	0	1	1635	1	1635
2	85	10	1	0	0	0	1	1	1	0	1	0	0	0	other	NA	0	0	0	2076	0	2076
2	85	8	0	0	0	0	1	0	1	0	0	0	1	0	NA	NA	0	1	1	1418	1	1418
1	85	3	0	0	1	0	0	0	1	0	1	0	0	0	NA	NA	0	0	1	785	1	785
1	85	5	0	0	0	1	0	1	1	0	0	0	1	1	carvedilol	NA	0	0	1	1049	1	1049
2	85	3	0	0	0	1	0	0	0	0	0	0	0	0	NA	NA	0	0	0	2004	0	2004
2	86	9	0	0	1	0	0	1	1	0	1	0	1	1	bisoprolol	NA	0	0	1	1491	1	1491
2	86	5	0	0	1	0	0	1	0	0	0	0	0	0	metoprolol	NA	0	0	1	1369	1	1369
2	86	9	0	0	1	0	0	0	1	1	0	0	1	0	NA	NA	0	0	0	1900	0	1900
2	86	10	0	0	1	0	0	0	0	0	0	0	0	0	NA	NA	1	0	1	188	1	188
2	85	7	0	0	1	0	0	1	1	0	1	0	0	0	metoprolol	NA	0	0	1	405	1	405
2	85	5	0	0	1	1	0	1	1	0	1	0	1	1	carvedilol	NA	0	1	1	2100	1	2100
2	85	3	0	0	1	0	1	1	1	0	1	0	0	1	carvedilol	NA	0	0	0	2075	0	2075
1	85	5	0	0	1	0	0	0	1	0	0	0	0	1	NA	NA	0	0	0	2032	0	2032
2	86	3	0	0	1	0	0	0	1	0	0	0	0	0	NA	NA	0	0	1	918	1	408
2	85	13	0	0	1	0	1	1	0	1	0	0	0	1	metoprolol	NA	0	0	1	1459	1	1030
2	86	9	0	0	1	0	0	1	0	0	0	0	0	0	carvedilol	NA	0	0	1	69	1	69
2	85	12	0	0	0	1	1	0	1	1	0	0	1	0	NA	NA	0	0	1	1461	1	819
1	85	9	0	0	0	0	0	1	0	0	0	1	1	0	carvedilol	NA	0	0	1	976	1	976
2	86	7	0	0	0	0	0	1	0	0	1	0	0	0	other	NA	0	0	0	1940	0	1940
2	85	8	0	0	1	0	0	0	1	0	0	0	0	0	NA	NA	0	0	1	311	1	291
1	85	15	0	1	0	0	0	1	1	0	0	0	0	0	metoprolol	doxazosin	0	0	1	52	1	18
2	85	8	0	0	1	0	0	0	0	0	0	0	0	0	NA	NA	0	0	1	1481	1	1481
2	85	10	0	0	1	1	1	1	0	0	0	0	0	0	nebivolol	NA	0	0	1	539	1	532
2	85	4	0	0	1	0	0	0	1	0	1	0	0	0	NA	NA	0	0	1	1035	1	1035
1	85	10	0	0	1	0	1	1	0	0	0	0	0	0	carvedilol	NA	0	0	1	773	1	340
2	86	4	0	0	1	0	1	0	0	1	0	0	0	0	NA	NA	0	0	1	25	1	25
2	93	3	0	0	1	0	0	0	0	0	0	0	0	0	NA	NA	0	0	1	329	1	329
2	86	4	0	0	1	0	0	0	1	0	0	0	1	0	NA	NA	0	0	1	581	1	581
2	85	13	0	0	0	0	0	1	1	1	0	0	0	0	carvedilol	NA	0	0	1	214	1	214
1	108	12	0	0	1	0	0	1	1	0	0	0	0	0	carvedilol	NA	0	0	1	36	1	36
1	85	10	0	0	1	0	0	0	0	0	0	0	1	0	NA	NA	0	0	0	2091	1	1095
2	85	5	0	0	1	0	0	0	1	0	0	0	1	0	NA	NA	0	0	0	2055	0	2055
2	86	5	0	0	1	0	1	0	1	1	0	0	1	0	NA	NA	0	0	1	1179	1	1179
2	85	20	0	0	0	1	1	1	1	0	1	0	1	0	bisoprolol	NA	0	1	1	731	1	731
2	86	14	0	0	1	0	0	0	0	0	0	0	0	0	NA	NA	0	0	1	949	1	865
2	86	5	0	0	0	0	0	1	0	0	1	0	0	0	carvedilol	NA	0	0	0	1887	0	1887
2	86	6	0	0	1	0	0	0	0	0	0	0	0	0	NA	NA	0	0	0	1964	0	1964
2	85	3	0	0	0	0	1	0	0	0	0	0	0	1	NA	NA	0	0	0	2143	1	116
2	85	5	0	0	1	0	0	0	0	0	0	0	1	0	NA	NA	0	0	1	179	1	179
2	85	5	0	0	1	0	0	1	1	0	0	1	1	0	other	NA	0	0	1	1404	1	1404
1	85	9	0	0	1	0	0	0	1	0	0	0	0	0	NA	NA	0	0	1	1705	1	648
2	85	8	0	0	0	0	0	1	0	0	0	0	0	0	carvedilol	NA	0	0	1	1884	1	678
1	86	9	0	1	1	1	0	0	0	0	1	1	0	0	NA	doxazosin	0	0	0	1804	0	1804
1	85	3	0	0	0	0	0	1	0	1	0	0	1	0	other	NA	0	0	1	363	1	357
1	85	7	0	0	0	0	1	0	1	0	1	0	0	0	NA	NA	0	0	1	1145	1	1145
1	93	6	0	1	1	0	0	0	1	0	0	0	0	0	NA	doxazosin	0	0	1	1019	1	41
1	86	5	0	0	1	0	0	1	0	0	0	0	0	0	nebivolol	NA	0	0	1	330	1	330
2	85	5	0	0	1	0	0	0	0	1	1	0	0	0	NA	NA	0	0	0	1989	0	1989
2	86	9	0	0	0	0	0	1	0	0	0	0	0	0	other	NA	0	0	1	977	1	168
2	86	6	0	0	1	0	0	1	0	0	0	0	0	0	carvedilol	NA	0	0	1	1167	1	1165
2	86	4	0	0	1	0	0	0	0	0	0	0	1	1	NA	NA	0	1	1	1046	1	507
2	93	10	0	0	0	1	0	1	1	0	0	0	0	0	carvedilol	NA	0	0	1	444	1	444
1	85	3	0	0	0	1	0	0	0	0	0	0	1	0	NA	NA	0	0	1	745	1	745
2	85	10	0	0	1	0	1	0	0	0	0	0	0	0	NA	NA	0	0	0	2132	0	2132
2	85	6	0	0	1	0	1	1	1	0	0	0	0	0	carvedilol	NA	0	0	1	1122	1	778
2	86	5	0	0	0	0	1	0	1	0	0	1	0	0	NA	NA	0	0	1	5	1	4
2	86	14	0	0	0	1	1	0	1	1	0	1	0	1	NA	NA	0	0	1	323	1	323
1	85	12	0	0	1	0	0	0	0	0	0	0	1	0	NA	NA	0	0	0	2102	0	2102
2	85	6	0	0	1	0	0	0	1	0	0	0	1	0	NA	NA	0	0	1	15	1	15
2	85	8	0	0	1	0	0	0	0	0	0	0	1	0	NA	NA	0	0	1	1493	1	1493
2	85	6	0	0	1	0	0	0	0	1	0	0	0	0	NA	NA	0	0	1	297	1	289
2	85	7	0	0	0	0	0	1	1	0	0	0	0	1	carvedilol	NA	0	0	1	1393	1	1261
2	86	21	1	0	0	0	1	0	0	1	0	0	0	0	NA	NA	0	0	1	35	1	35
2	93	7	0	0	1	0	0	1	0	0	0	0	0	0	carvedilol	NA	0	0	1	156	1	156
2	85	9	0	0	1	0	1	0	1	0	0	0	1	0	NA	NA	0	0	1	124	1	124
2	100	11	0	0	1	0	0	0	0	0	0	0	0	0	NA	NA	0	0	1	1173	1	1173
1	86	9	0	0	1	0	1	0	1	0	0	0	0	0	NA	NA	0	0	1	213	1	178
1	85	7	0	0	0	0	1	1	0	0	0	0	0	1	carvedilol	NA	0	0	0	1986	1	342
2	85	7	0	0	0	1	1	0	1	0	0	0	0	0	NA	NA	0	0	1	1971	1	1178
2	85	5	0	1	1	1	0	1	1	0	1	0	1	0	bisoprolol	doxazosin	0	1	1	1490	1	799
2	85	10	0	0	0	1	1	0	0	0	0	0	0	0	NA	NA	0	0	1	2084	1	2084
2	86	4	0	0	1	0	1	0	1	0	0	0	0	0	NA	NA	0	0	1	11	1	11
2	85	6	0	0	0	0	1	0	1	1	0	0	0	0	NA	NA	0	0	1	210	1	210
2	86	2	0	0	1	1	0	0	1	0	1	0	0	1	NA	NA	0	0	0	1925	0	1925
2	85	10	0	0	1	0	1	1	0	0	0	0	0	0	carvedilol	NA	0	0	1	1574	1	1574
1	85	6	0	0	0	1	1	0	0	0	0	0	0	0	NA	NA	0	0	1	890	1	204
2	85	7	0	0	0	0	1	1	0	1	0	0	0	0	carvedilol	NA	0	1	1	1139	1	673
2	86	5	0	0	1	0	1	0	0	0	0	0	1	1	NA	NA	0	0	0	1825	0	1825
2	86	6	0	0	0	0	0	1	0	0	0	0	1	0	carvedilol	NA	0	1	1	235	1	235
2	86	4	0	0	0	0	1	1	1	0	0	0	0	0	carvedilol	NA	0	0	0	1857	0	1857
2	93	8	0	0	1	0	1	1	0	1	0	0	0	0	carvedilol	NA	0	0	1	758	1	758
2	85	5	0	0	0	1	1	1	1	1	1	0	0	0	carvedilol	NA	0	0	1	245	1	245
2	86	7	0	0	0	0	0	1	0	0	0	0	0	0	other	NA	0	0	1	1295	1	1295
1	85	5	0	0	0	0	1	0	1	1	0	1	0	0	NA	NA	0	0	1	1431	1	63
2	86	5	0	0	0	1	0	0	1	0	1	0	0	0	NA	NA	0	0	1	1579	1	1579
1	86	8	0	0	0	1	0	1	1	0	1	0	0	0	bisoprolol	NA	0	1	1	1061	1	1042
2	86	7	0	0	1	0	0	0	1	0	0	0	0	0	NA	NA	0	0	1	64	1	64
2	85	7	0	0	1	0	1	1	1	0	1	0	0	0	carvedilol	NA	0	0	1	582	1	582
2	86	11	0	0	1	0	1	0	1	1	1	0	0	0	NA	NA	0	0	1	899	1	899
2	86	10	1	0	0	1	0	0	1	0	0	1	0	1	NA	NA	0	0	1	1757	1	458
2	86	4	0	0	0	1	1	1	1	0	0	0	0	0	carvedilol	NA	0	1	1	366	1	366
1	86	12	0	0	0	0	0	1	1	0	0	0	1	0	carvedilol	NA	0	0	1	514	1	411
1	86	6	0	0	0	0	0	1	0	0	0	0	1	0	metoprolol	NA	0	0	1	149	1	149
2	86	3	0	0	1	0	0	0	1	0	0	0	1	0	NA	NA	0	0	1	635	1	635
2	86	12	0	0	1	0	0	1	0	1	0	0	0	0	carvedilol	NA	0	0	1	1713	1	1713
2	85	3	0	0	1	0	0	0	1	0	0	0	0	0	NA	NA	0	0	1	1960	1	1960
1	86	6	0	0	1	0	1	0	1	0	0	1	0	0	NA	NA	0	0	1	783	1	783
2	86	7	0	0	1	0	1	1	1	0	0	0	0	0	metoprolol	NA	0	1	1	17	1	17
2	86	9	0	0	1	0	1	0	0	0	1	0	0	0	NA	NA	0	0	1	1731	1	1731
2	85	10	0	0	1	0	0	0	1	0	0	0	0	0	NA	NA	0	0	0	2147	0	2147
2	86	9	0	0	1	0	0	0	0	0	0	0	1	1	NA	NA	0	0	1	1868	1	1868
2	93	7	0	0	0	0	1	0	1	0	0	0	0	0	NA	NA	0	1	1	486	1	3
2	86	18	1	0	1	0	0	1	0	1	1	0	0	0	carvedilol	NA	0	0	0	1803	0	1803
2	85	4	0	0	1	1	0	1	1	0	1	0	1	0	carvedilol	NA	0	0	0	2032	0	2032
2	86	13	0	0	1	0	0	1	1	0	1	0	0	0	other	NA	0	0	1	916	1	916
2	86	10	0	0	1	0	0	1	1	0	0	1	0	0	carvedilol	NA	0	0	1	32	1	32
2	86	7	0	0	0	0	0	1	1	1	0	0	0	0	carvedilol	NA	1	0	1	1493	1	651
1	85	7	1	0	1	0	0	1	0	0	0	0	0	0	carvedilol	NA	0	0	1	2	1	2
2	85	2	0	0	0	1	0	0	0	0	0	0	0	0	NA	NA	0	0	1	1242	1	1242
2	93	11	0	0	0	0	1	0	0	0	0	0	0	0	NA	NA	0	1	1	297	1	297
1	86	4	0	0	0	0	1	0	1	0	0	0	1	0	NA	NA	0	0	1	154	1	154
1	86	5	0	0	0	1	1	1	1	0	1	0	0	0	other	NA	0	0	1	1172	1	1172
2	86	9	0	0	1	0	1	0	1	0	0	0	0	0	NA	NA	0	0	0	1793	0	1793
2	85	2	0	0	0	0	0	1	0	0	0	0	0	1	carvedilol	NA	0	0	1	1810	1	1810
2	86	5	0	0	0	1	0	0	0	0	0	0	0	0	NA	NA	0	0	1	649	1	649
2	85	8	0	0	1	0	0	1	1	0	0	0	0	0	carvedilol	NA	0	0	1	980	1	980
2	85	6	0	0	0	0	0	1	1	0	1	0	0	0	carvedilol	NA	0	0	1	115	1	115
2	85	6	0	0	1	0	0	1	1	1	0	1	1	0	metoprolol	NA	0	1	1	541	1	541
2	85	3	0	0	1	0	1	0	1	0	1	0	0	0	NA	NA	0	0	0	2102	0	2102
2	85	5	0	0	0	1	0	0	1	0	0	0	1	0	NA	NA	0	0	0	2010	1	998
2	86	19	0	0	1	0	1	0	0	0	0	0	0	0	NA	NA	0	0	1	36	1	36
1	85	11	0	0	1	0	0	0	1	0	0	0	1	0	NA	NA	0	0	1	119	1	119
1	85	4	0	0	1	0	1	0	0	0	0	0	1	0	NA	NA	0	0	0	2009	1	806
2	86	0	0	0	0	0	1	1	1	0	0	0	0	0	carvedilol	NA	0	0	1	392	1	392
2	85	7	0	0	1	1	1	1	1	1	0	0	0	0	carvedilol	NA	0	0	1	1175	1	1175
1	100	7	0	0	1	0	1	0	1	0	0	0	0	0	NA	NA	0	0	1	34	1	34
2	85	10	0	0	1	1	0	1	1	1	0	0	1	0	carvedilol	NA	0	0	0	1996	0	1996
2	85	8	0	0	0	0	0	1	0	0	0	0	1	0	carvedilol	NA	0	1	1	1036	1	1036
1	86	8	0	0	1	0	1	0	1	0	0	0	0	0	NA	NA	0	0	1	35	1	35
1	86	3	0	0	0	0	1	1	1	0	0	0	0	0	carvedilol	NA	0	0	1	1021	1	325
2	85	5	0	0	1	0	0	1	1	0	0	0	0	0	other	NA	0	0	1	510	1	510
2	92	6	0	0	1	0	1	1	1	0	1	0	1	1	metoprolol	NA	0	0	1	806	1	806
2	85	5	0	0	0	1	1	0	1	0	1	1	1	0	NA	NA	0	1	1	1633	1	1633
1	86	4	0	1	0	0	0	1	1	0	0	0	0	0	carvedilol	doxazosin	0	1	1	1134	1	1134
1	86	9	0	0	0	0	1	1	1	1	0	1	0	0	metoprolol	NA	0	0	0	1788	0	1788
2	85	8	1	0	1	0	0	0	0	0	0	0	0	0	NA	NA	0	0	1	1023	1	1020
1	86	20	0	0	1	0	0	1	1	0	0	0	1	0	carvedilol	NA	1	1	1	223	1	191
1	93	5	0	0	0	0	1	0	1	0	0	0	1	0	NA	NA	0	0	1	1882	1	832
2	85	8	0	0	1	0	0	0	1	0	0	0	1	0	NA	NA	0	0	1	976	1	976
2	86	9	0	0	0	0	1	1	0	0	0	0	0	0	carvedilol	NA	0	0	0	1870	1	788
2	86	4	0	0	1	0	0	1	0	0	0	0	0	0	carvedilol	NA	0	0	0	1905	1	583
2	85	6	0	0	0	0	1	0	1	1	0	0	0	1	NA	NA	0	0	1	1492	1	1492
2	85	6	0	0	1	0	0	0	0	0	0	0	0	1	NA	NA	0	0	1	441	1	441
2	92	9	0	0	1	0	1	1	1	0	1	1	1	0	carvedilol	NA	0	0	1	1797	1	1797
2	93	7	0	0	1	0	0	0	1	0	1	1	1	0	NA	NA	0	0	1	1881	1	1881
1	85	8	0	0	0	0	1	0	1	0	0	0	0	0	NA	NA	0	0	1	998	1	998
1	85	6	0	0	1	0	0	0	0	0	0	0	0	1	NA	NA	0	1	1	4	1	4
1	85	9	0	0	0	0	1	0	1	0	0	0	0	0	NA	NA	0	0	1	46	1	46
2	85	8	0	0	1	0	1	1	1	0	0	1	1	0	carvedilol	NA	0	1	1	1575	1	1575
2	85	3	0	0	1	0	1	1	1	0	0	1	1	0	other	NA	0	1	0	2103	0	2103
1	85	4	0	0	1	0	0	0	1	1	0	0	1	0	NA	NA	1	0	1	76	1	76
1	85	8	0	0	1	0	0	0	0	0	0	0	1	0	NA	NA	0	0	1	958	1	958
1	93	5	0	0	1	0	0	1	0	0	0	0	0	0	carvedilol	NA	0	0	1	131	1	131
2	86	8	0	0	0	0	1	0	1	1	0	0	0	0	NA	NA	0	0	1	532	1	6
2	85	6	0	0	0	1	1	0	1	0	1	1	1	0	NA	NA	0	1	0	2026	0	2026
2	85	2	0	0	1	0	0	0	0	0	0	0	0	0	NA	NA	0	0	1	74	1	74
2	85	6	0	0	0	0	1	0	1	0	0	0	0	0	NA	NA	0	1	1	558	1	558
2	85	14	0	0	1	0	0	1	1	0	0	0	0	1	carvedilol	NA	1	1	1	888	1	37
2	86	5	0	0	1	0	1	0	1	0	0	0	1	0	NA	NA	0	0	1	4	1	4
2	85	5	0	0	0	1	1	0	0	0	0	0	1	0	NA	NA	0	0	0	2090	0	2090
2	86	13	0	0	1	0	0	1	0	1	0	0	1	1	nebivolol	NA	0	0	1	1069	1	1069
1	93	15	0	0	1	0	0	1	1	0	0	1	0	0	carvedilol	NA	0	0	1	357	1	310
1	85	7	0	0	1	0	0	0	1	0	0	1	0	0	NA	NA	0	0	0	2068	0	2068
[truncated: 51,318 more rows]
