# Supplementary material for: Impact of Alpha-Adrenergic Receptor Antagonists on outcomes in patients with heart failure. A post-hoc analysis using National Health Fund database
Source: Research Square preprint supplement (doi:10.21203/rs.3.rs-259923/v1), 2021-02-26
Supplement: Supplementary file 1 [file e9b53f319f0d61361a9bdc3c.pdf]

**Impact of Alpha-Adrenergic Receptor Antagonists on outcomes in patients with heart failure. A post-hoc analysis using National Health Fund database.**

Bartosz Symonides, Jacek Lewandowski, Andrzej Śliwczyński

## Supplemental Fig. S1

Primary (a) and secondary (b) endpoints in men only subgroup.

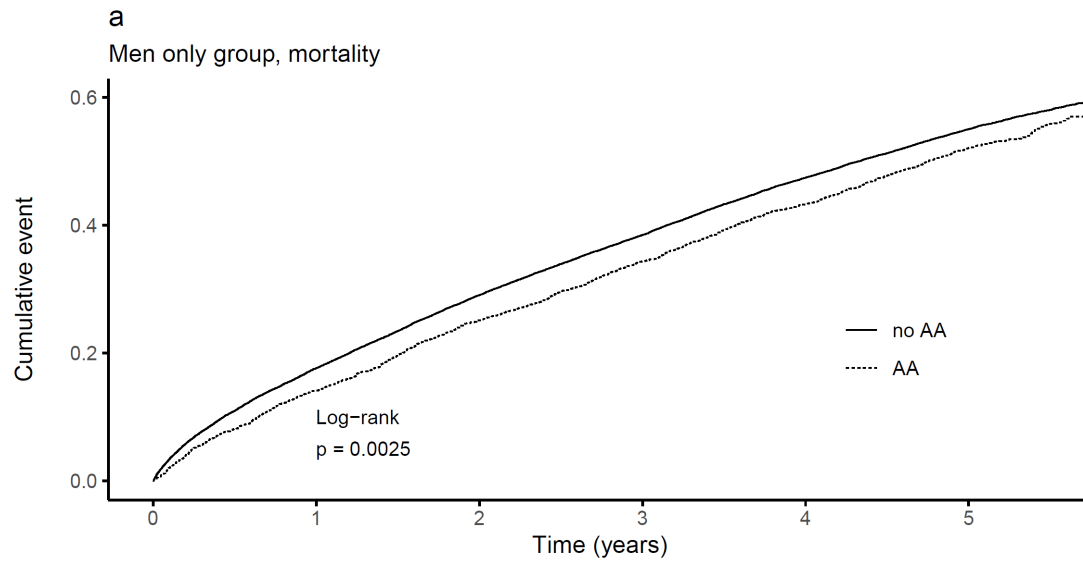

|       |       |       |       |       |       |      |
|-------|-------|-------|-------|-------|-------|------|
| no AA | 21645 | 17830 | 15360 | 13318 | 11385 | 8836 |
| AA    | 1906  | 1637  | 1427  | 1252  | 1082  | 817  |

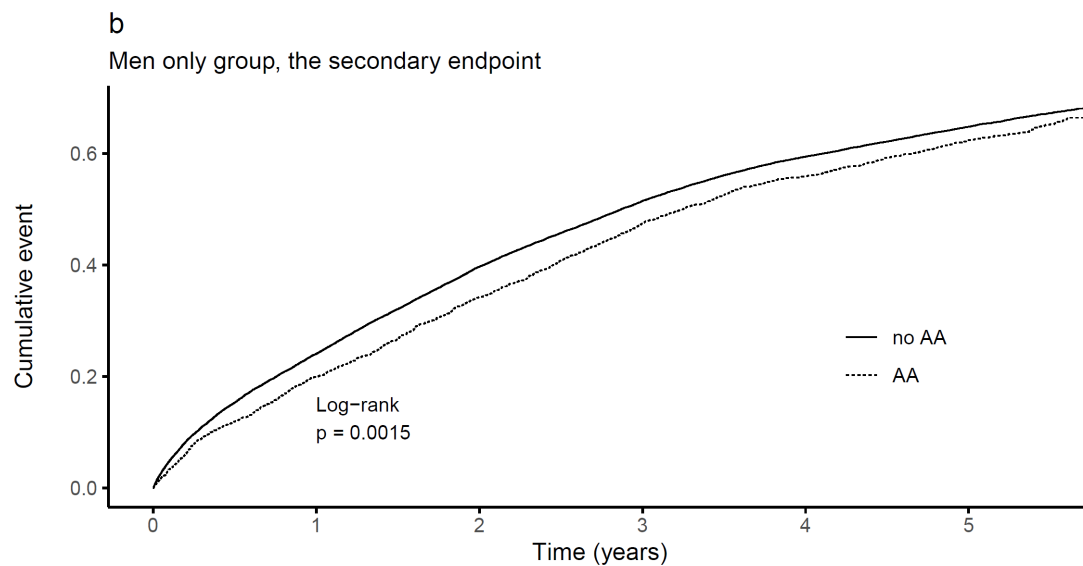

|       |       |       |       |       |      |      |
|-------|-------|-------|-------|-------|------|------|
| no AA | 21645 | 16442 | 13057 | 10501 | 8786 | 6893 |
| AA    | 1906  | 1526  | 1253  | 1003  | 841  | 641  |

AA - alpha-adrenolytics

## Supplemental Fig. S2

Cox analysis for primary (a) and secondary (b) endpoints in men only subgroup.

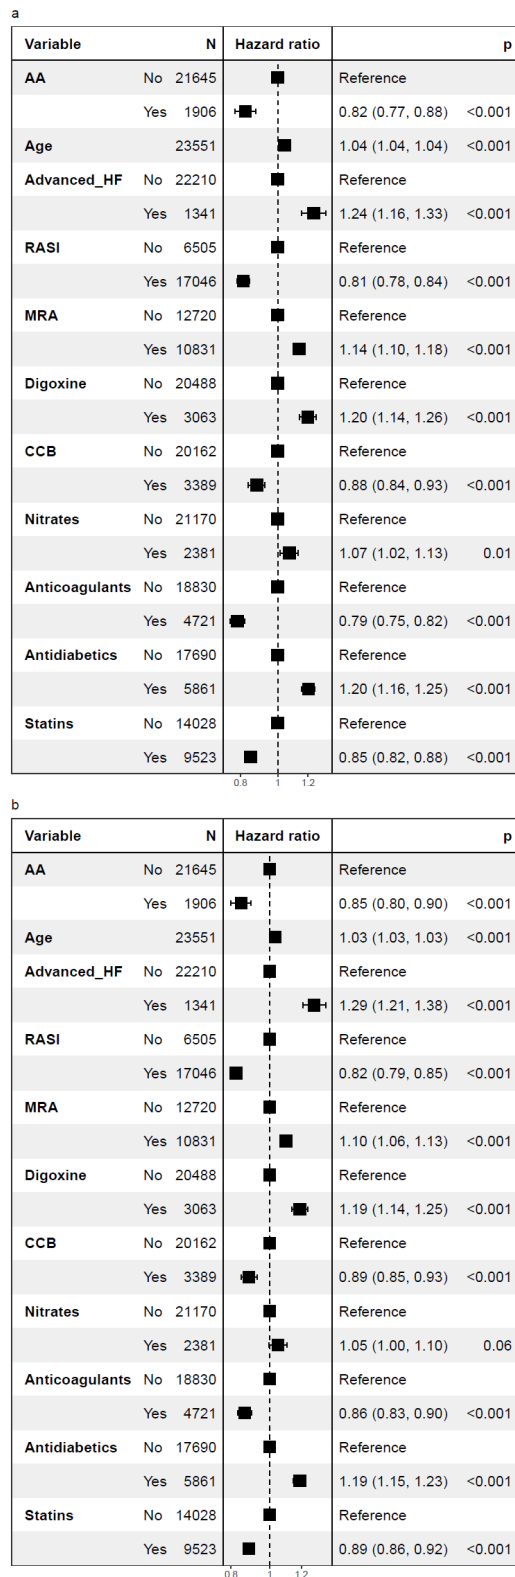

AA - alpha-adrenolytics; RASI - renin angiotensin system inhibitors (converting enzyme inhibitor and/or angiotensin receptor blocker); MRA - aldosterone receptor antagonists; CCB - dihydropyridine calcium channel blockers.
